# Supplementary material for: Mechanism of the cadherin–catenin F-actin catch bond interaction
Source: eLife. 2022 Aug 1;11:e80130. doi: 10.7554/eLife.80130 (PMC9402232; doi:10.7554/eLife.80130)
Supplement: Figure 3—figure supplement 3—source data 1. [file elife-80130-fig3-figsupp3-data1.xlsx]

## Sheet: Sheet1
	file name	step forces	step lifetimes
0	200802_abd_cell3_db2b3.npz	[15.1196]	[0.958]
1	200719_acatnolnk_cell2_db3b3.npz	[-9.8431]	[0.704]
2	200719_acatnolnk_cell2_db3b3.npz	[5.417]	[8.263]
3	200719_acatnolnk_cell2_db3b3.npz	[-8.22]	[12.114]
4	200720_acatABDnolink_cell1_db2b2.npz	[18.68]	[0.074]
5	200809_abd_cell4_db3b11.npz	[-15.2339]	[2.011]
6	200721_acatabd_cell4_db4b8.npz	[12.1595]	[3.556]
7	200808_abd_cell4_db2b4.npz	[-10.9055]	[0.831]
8	200721_acatabd_cell1_db2b3.npz	[11.3137]	[0.025]
9	200721_acatabd_cell1_db2b3.npz	[-13.2677]	[0.113]
10	200721_acatabd_cell1_db2b3.npz	[-12.1683]	[0.071]
11	200721_acatabd_cell1_db2b3.npz	[-12.7064]	[3.438]
12	200721_acatabd_cell1_db2b3.npz	[-13.5613]	[0.328]
13	200721_acatabd_cell1_db2b3.npz	[-13.1848]	[0.248]
14	200721_acatabd_cell1_db2b3.npz	[-12.471]	[0.216]
15	200721_acatabd_cell1_db2b3.npz	[-12.6693]	[0.509]
16	200721_acatabd_cell1_db2b3.npz	[-10.7152]	[0.266]
17	200721_acatabd_cell1_db2b3.npz	[-8.515]	[0.041]
18	200809_abd_cell4_db2b7.npz	[16.453]	[0.031]
19	200829_abd_cell1_db3b5.npz	[13.9814]	[0.251]
20	200807_abd_cell1_db2b8.npz	[7.0338]	[0.91]
21	200807_abd_cell1_db2b8.npz	[13.5645]	[0.057]
22	200807_abd_cell1_db2b8.npz	[12.4696]	[2.084]
23	200807_abd_cell1_db2b8.npz	[7.367]	[4.313]
24	200807_abd_cell1_db2b8.npz	[-10.3243]	[0.209]
25	200807_abd_cell1_db2b8.npz	[-10.217]	[0.069]
26	200807_abd_cell1_db2b8.npz	[12.4046]	[1.409]
27	200807_abd_cell1_db2b8.npz	[-11.2651]	[0.692]
28	200807_abd_cell1_db2b8.npz	[12.7221]	[0.378]
29	200807_abd_cell1_db2b8.npz	[-10.1686]	[3.313]
30	200807_abd_cell1_db2b8.npz	[13.4926]	[0.208]
31	200807_abd_cell1_db2b8.npz	[-11.3693]	[1.509]
32	200807_abd_cell1_db2b8.npz	[-11.1668]	[5.103]
33	200807_abd_cell1_db2b8.npz	[3.4145]	[0.013]
34	200807_abd_cell6_db1b10.npz	[-5.1904]	[0.177]
35	200807_abd_cell6_db1b10.npz	[-12.2289]	[1.468]
36	200807_abd_cell6_db1b10.npz	[13.9888]	[0.187]
37	200807_abd_cell6_db1b10.npz	[12.9302]	[0.004]
38	200807_abd_cell6_db1b10.npz	[13.8182]	[1.408]
39	200807_abd_cell6_db1b10.npz	[12.6923]	[0.962]
40	200807_abd_cell6_db1b10.npz	[11.4661]	[0.127]
41	200805_abd_cell2_db1b1.npz	[-3.2368]	[0.107]
42	200807_abd_cell1_db3b9.npz	[12.8274]	[0.129]
43	200727_acatabd_cell3_db5b7.npz	[-0.1149]	[0.115]
44	200727_acatabd_cell3_db5b7.npz	[-12.0808]	[0.044]
45	200727_acatabd_cell3_db5b7.npz	[-11.7277]	[0.633]
46	200727_acatabd_cell3_db5b7.npz	[-11.6985]	[0.02]
47	200801_abd_new_gfpslips_db4b9.npz	[-12.8418]	[4.515]
48	200829_abd_cell2_d3db13.npz	[-11.0037]	[0.115]
49	200807_abd_cell3_db3b10.npz	[9.3958]	[0.643]
50	200807_abd_cell3_db3b10.npz	[-9.7428]	[0.01]
51	200807_abd_cell3_db3b10.npz	[8.3433]	[7.322]
52	200807_abd_cell3_db3b10.npz	[1.3527]	[0.072]
53	200807_abd_cell3_db3b10.npz	[9.6904]	[8.544]
54	200807_abd_cell3_db3b10.npz	[8.7934]	[0.528]
55	200809_abd_cell1_db3b10.npz	[13.7486]	[3.772]
56	200809_abd_cell1_db3b10.npz	[12.2443]	[12.751]
57	200809_abd_cell1_db3b10.npz	[7.0433]	[25.886]
58	200809_abd_cell1_db3b11.npz	[10.7842]	[3.665]
59	200802_abd_cell4_db1b1.npz	[13.0389]	[0.004]
60	200808_abd_cell2_db1b3.npz	[8.1206]	[0.45]
61	200806_abd_cell3_db1b4.npz	[6.8515]	[0.147]
62	200806_abd_cell3_db1b4.npz	[-11.4344]	[1.43]
63	200806_abd_cell3_db1b4.npz	[-12.0179]	[0.613]
64	200807_abd_cell2_db2b4.npz	[16.5057]	[1.577]
65	200807_abd_cell6_db1b10b.npz	[-12.1196]	[0.02]
66	200807_abd_cell6_db1b10b.npz	[-11.9396]	[0.02]
67	200807_abd_cell6_db1b10b.npz	[14.4905]	[1.319]
68	200807_abd_cell6_db1b10b.npz	[-5.7352]	[0.103]
69	200807_abd_cell6_db1b10b.npz	[-8.2565]	[0.294]
70	200807_abd_cell6_db1b10b.npz	[-10.2361]	[0.921]
71	200807_abd_cell6_db1b10b.npz	[-10.7287]	[6.555]
72	200807_abd_cell6_db1b10b.npz	[-5.6108]	[0.016]
73	200807_abd_cell6_db1b10b.npz	[-10.8278]	[5.661]
74	200807_abd_cell6_db1b10b.npz	[12.0099]	[2.203]
75	200801_abd_new_gfpslips_cell2_db3b10.npz	[-7.1068]	[0.248]
76	200801_abd_new_gfpslips_cell2_db3b10.npz	[7.8999]	[1.397]
77	200801_abd_new_gfpslips_cell2_db3b10.npz	[-10.8347]	[0.636]
78	200801_abd_new_gfpslips_cell2_db3b10.npz	[-11.1633]	[0.62]
79	200801_abd_new_gfpslips_cell2_db3b10.npz	[-11.9777]	[0.03]
80	200721_acatabd_cell4_db5b9.npz	[-11.6136]	[17.279]
81	200802_abd_cell3_db1b1.npz	[-14.6767]	[0.043]
82	200719_acatnolnk_cell2_db4b4.npz	[16.5359]	[1.388]
83	200807_abd_cell6_db1b9.npz	[6.1187]	[0.264]
84	200807_abd_cell6_db1b9.npz	[-13.2894]	[0.482]
85	200829_abd_cell2_d3_db11.npz	[12.7722]	[2.792]
86	200829_abd_cell2_d3_db11.npz	[14.3878]	[4.727]
87	200829_abd_cell2_d3_db11.npz	[15.1732]	[4.853]
88	200806_abd_cell3_db3b10.npz	[-8.3299]	[1.062]
89	200722_acatABD_cell1_db4b5.npz	[-13.5476]	[0.527]
90	200722_acatABD_cell1_db4b5.npz	[-13.3385]	[0.051]
91	200722_acatABD_cell1_db4b5.npz	[-12.6433]	[0.592]
92	200806_abd_cell3_db1b3.npz	[-12.0151]	[0.086]
93	200807_abd_cell1_db2b8b.npz	[10.6293]	[0.731]
94	200807_abd_cell1_db2b8b.npz	[10.579]	[0.237]
95	200807_abd_cell1_db2b8b.npz	[11.9122]	[0.609]
96	200807_abd_cell1_db2b8b.npz	[-8.9819]	[0.04]
97	200807_abd_cell1_db2b8b.npz	[5.8292]	[0.249]
98	200807_abd_cell1_db2b8b.npz	[-8.7485]	[0.662]
99	200807_abd_cell1_db2b8b.npz	[8.5742]	[0.51]
100	200807_abd_cell1_db2b8b.npz	[12.5462]	[1.669]
101	200807_abd_cell1_db2b8b.npz	[9.7879]	[4.259]
102	200807_abd_cell1_db2b8b.npz	[12.839]	[0.204]
103	200807_abd_cell1_db2b8b.npz	[3.2355]	[0.196]
104	200807_abd_cell1_db2b8b.npz	[9.9277]	[1.24]
105	200807_abd_cell1_db2b8b.npz	[9.9972]	[1.625]
106	200807_abd_cell1_db2b8b.npz	[10.995]	[0.035]
107	200807_abd_cell1_db2b8b.npz	[10.0001]	[0.698]
108	200807_abd_cell1_db2b8b.npz	[12.5039]	[0.043]
109	200807_abd_cell1_db2b8b.npz	[-9.3659]	[0.687]
110	200807_abd_cell1_db2b8b.npz	[-7.3354]	[0.529]
111	200722_acatABD_cell1_db2b2.npz	[-13.1896]	[0.015]
112	200802_abd_cell4_db2b3.npz	[-2.9203]	[3.748]
113	200802_abd_cell4_db2b3.npz	[-8.7723]	[0.003]
114	200807_abd_cell6_db1b10.npz	[13.1799]	[0.798]
115	200807_abd_cell6_db1b10.npz	[13.9554]	[2.225]
116	200807_abd_cell6_db1b10.npz	[-2.7958]	[0.013]
117	200807_abd_cell6_db1b10.npz	[14.1063]	[2.87]
118	200806_abd_cell3_db3b13.npz	[-12.0558]	[1.065]
119	200806_abd_cell3_db3b13.npz	[-12.0414]	[2.352]
120	200806_abd_cell3_db3b13.npz	[-12.2663]	[0.336]
121	200806_abd_cell3_db3b13.npz	[-13.0838]	[0.141]
122	200806_abd_cell3_db3b13.npz	[-13.004]	[0.256]
123	200806_abd_cell3_db3b13.npz	[-12.7796]	[0.343]
124	200806_abd_cell3_db3b13.npz	[14.5808]	[0.027]
125	200806_abd_cell3_db3b13.npz	[-2.8942]	[0.18]
126	200806_abd_cell3_db3b13.npz	[-13.4949]	[0.125]
127	200806_abd_cell3_db3b13.npz	[-13.3385]	[0.292]
128	200806_abd_cell3_db3b13.npz	[14.2642]	[0.131]
129	200806_abd_cell3_db3b13.npz	[14.9987]	[0.021]
130	200806_abd_cell3_db3b13.npz	[-13.6234]	[0.625]
131	200806_abd_cell3_db3b13.npz	[-13.1462]	[2.62]
132	200806_abd_cell3_db3b13.npz	[7.7267]	[0.047]
133	200806_abd_cell3_db3b13.npz	[-13.203]	[2.1]
134	200809_abd_cell2_db3b5.npz	[-9.0295]	[1.126]
135	200807_abd_cell6_db1b10b.npz	[-11.4281]	[0.093]
136	200807_abd_cell6_db1b10b.npz	[-11.5871]	[0.4]
137	200807_abd_cell6_db1b10b.npz	[-10.9765]	[0.086]
138	200807_abd_cell6_db1b10b.npz	[-11.9964]	[0.035]
139	200807_abd_cell6_db1b10b.npz	[13.8075]	[1.823]
140	200807_abd_cell6_db1b10b.npz	[-12.0469]	[0.029]
141	200807_abd_cell6_db1b10b.npz	[12.5896]	[1.173]
142	200807_abd_cell6_db1b10b.npz	[-11.5659]	[0.295]
143	200807_abd_cell6_db1b10b.npz	[15.0284]	[1.524]
144	200807_abd_cell6_db1b10b.npz	[-11.7093]	[0.044]
145	200807_abd_cell6_db1b10b.npz	[13.5314]	[0.34]
146	200807_abd_cell6_db1b10b.npz	[13.7523]	[1.332]
147	200807_abd_cell6_db1b10b.npz	[-11.1668]	[0.052]
148	200807_abd_cell6_db1b10b.npz	[-5.9161]	[0.023]
149	200807_abd_cell6_db1b10b.npz	[-9.1592]	[0.022]
150	200807_abd_cell6_db1b10b.npz	[-8.1224]	[0.046]
151	200807_abd_cell6_db1b10b.npz	[-10.5749]	[0.005]
152	200807_abd_cell6_db1b10b.npz	[-12.5396]	[0.021]
153	200807_abd_cell6_db1b10b.npz	[-11.867]	[0.072]
154	200807_abd_cell1_db3b10.npz	[13.7791]	[0.111]
155	200807_abd_cell1_db2b7b.npz	[11.2494]	[0.005]
156	200807_abd_cell1_db2b7b.npz	[-9.7561]	[0.923]
157	200807_abd_cell1_db2b7b.npz	[13.6328]	[0.007]
158	200807_abd_cell1_db2b7b.npz	[13.9135]	[0.098]
159	200807_abd_cell1_db2b7b.npz	[14.1452]	[0.063]
160	200807_abd_cell1_db2b7b.npz	[14.3835]	[0.03]
161	200807_abd_cell1_db2b7b.npz	[14.3189]	[0.025]
162	200807_abd_cell1_db2b7b.npz	[14.3909]	[0.011]
163	200807_abd_cell1_db2b7b.npz	[14.6363]	[0.295]
164	200807_abd_cell1_db2b7b.npz	[-11.1091]	[1.198]
165	200807_abd_cell1_db2b7b.npz	[-10.5926]	[6.663]
166	200807_abd_cell1_db2b7b.npz	[15.0581]	[0.255]
167	200807_abd_cell1_db2b7b.npz	[14.6317]	[0.076]
168	200807_abd_cell1_db2b7b.npz	[-10.7602]	[0.496]
169	200807_abd_cell1_db2b7b.npz	[8.6236]	[0.457]
170	200807_abd_cell1_db2b7b.npz	[-8.2195]	[9.803]
171	200807_abd_cell1_db2b7b.npz	[-10.0626]	[16.258]
172	200807_abd_cell1_db2b7b.npz	[13.3206]	[3.449]
173	200807_abd_cell1_db2b7b.npz	[7.4348]	[0.005]
174	200807_abd_cell1_db2b7b.npz	[11.3986]	[0.009]
175	200807_abd_cell1_db2b7b.npz	[-10.7285]	[1.542]
176	200807_abd_cell1_db2b7b.npz	[-7.9294]	[0.433]
177	200807_abd_cell1_db2b7b.npz	[-2.6662]	[0.117]
178	200807_abd_cell1_db2b7b.npz	[-10.1423]	[10.509]
179	200807_abd_cell1_db2b7b.npz	[-9.9441]	[7.158]
180	200807_abd_cell1_db2b7b.npz	[-7.7704]	[3.399]
181	200808_abd_cell3_db2b15.npz	[-8.021]	[0.024]
182	200808_abd_cell3_db2b15.npz	[-6.8816]	[0.007]
183	200808_abd_cell3_db2b15.npz	[-9.2823]	[0.01]
184	200721_acatabd_cell1_db2b7b.npz	[19.6044]	[0.054]
185	200721_acatabd_cell1_db2b7b.npz	[-15.0123]	[0.258]
186	200721_acatabd_cell1_db2b7b.npz	[20.2657]	[0.006]
187	200721_acatabd_cell1_db2b7b.npz	[18.8417]	[0.009]
188	200806_abd_cell3_flippeddb3b22.npz	[-10.8655]	[0.009]
189	200806_abd_cell3_flippeddb3b22.npz	[-10.5148]	[0.092]
190	200806_abd_cell3_flippeddb3b22.npz	[-12.159]	[0.249]
191	200806_abd_cell3_flippeddb3b22.npz	[-11.6576]	[0.733]
192	200807_abd_cell6_db1b2.npz	[-11.8557]	[0.006]
193	200807_abd_cell6_db1b2.npz	[13.3811]	[0.056]
194	200807_abd_cell6_db1b2.npz	[15.427]	[0.209]
195	200807_abd_cell6_db1b2.npz	[12.9129]	[0.015]
196	200807_abd_cell6_db1b2.npz	[-13.1397]	[1.747]
197	200807_abd_cell6_db1b2.npz	[3.03]	[0.097]
198	200807_abd_cell6_db1b2.npz	[15.2192]	[3.989]
199	200809_abd_cell2_db7b15.npz	[13.2098]	[0.02]
200	200807_abd_cell4_db4b11.npz	[13.2148]	[2.645]
201	200809_abd_cell1_db1b3.npz	[16.6717]	[2.232]
202	200809_abd_cell1_db1b3.npz	[-12.7737]	[0.097]
203	200809_abd_cell1_db1b3.npz	[-15.2886]	[0.834]
204	200809_abd_cell1_db1b3.npz	[-16.1744]	[1.669]
205	200721_acatabd_cell2_db1b1.npz	[13.9727]	[0.384]
206	200721_acatabd_cell2_db1b1.npz	[14.8126]	[0.059]
207	200807_abd_cell4_db4b10.npz	[15.8477]	[0.046]
208	200807_abd_cell4_db4b10.npz	[-8.565]	[0.497]
209	200807_abd_cell5_db3b9.npz	[15.9816]	[0.097]
210	200807_abd_cell5_db3b9.npz	[14.5496]	[0.678]
211	200807_abd_cell6_db1b3.npz	[-14.1235]	[0.063]
212	200719_acatnolnk_cell1_db4b6.npz	[13.1496]	[0.326]
213	200720_acatABDnolink_cell3_db2b3.npz	[-12.9866]	[0.313]
214	200720_acatABDnolink_cell3_db2b3.npz	[15.3682]	[0.052]
215	200720_acatABDnolink_cell3_db2b3.npz	[-11.54]	[4.62]
216	200720_acatABDnolink_cell3_db2b3.npz	[-11.4855]	[43.248]
217	200806_abd_cell3_flippeddb3b22b.npz	[11.4273]	[0.55]
218	200806_abd_cell3_flippeddb3b22b.npz	[15.5122]	[0.441]
219	200806_abd_cell3_flippeddb3b22b.npz	[-5.251]	[0.137]
220	200806_abd_cell3_flippeddb3b22b.npz	[16.9972]	[0.109]
221	200806_abd_cell3_flippeddb3b22b.npz	[-10.9278]	[0.024]
222	200806_abd_cell3_flippeddb3b22b.npz	[16.3796]	[0.326]
223	200806_abd_cell3_flippeddb3b22b.npz	[-8.3853]	[0.575]
224	200806_abd_cell3_flippeddb3b22b.npz	[-9.9615]	[0.606]
225	200806_abd_cell3_flippeddb3b22b.npz	[-10.7445]	[0.013]
226	200806_abd_cell3_flippeddb3b22b.npz	[15.6838]	[5.962]
227	200806_abd_cell3_flippeddb3b22b.npz	[16.5273]	[0.271]
228	200806_abd_cell3_flippeddb3b22b.npz	[16.7761]	[0.016]
229	200806_abd_cell3_flippeddb3b22b.npz	[-11.291]	[0.521]
230	200806_abd_cell3_flippeddb3b22b.npz	[-3.5099]	[0.016]
231	200807_abd_cell1_db2b7.npz	[15.2293]	[0.601]
232	200807_abd_cell1_db2b7.npz	[15.2142]	[1.45]
233	200807_abd_cell1_db2b7.npz	[14.6815]	[0.194]
234	200807_abd_cell1_db2b7.npz	[14.8537]	[0.003]
235	200807_abd_cell1_db2b7.npz	[13.623]	[0.007]
236	200807_abd_cell1_db2b7.npz	[7.2754]	[0.085]
237	200807_abd_cell1_db2b7.npz	[12.1434]	[0.203]
238	200807_abd_cell1_db2b7.npz	[12.6281]	[1.949]
239	200807_abd_cell1_db2b7.npz	[-12.1775]	[4.877]
240	200807_abd_cell1_db2b7.npz	[-11.2748]	[0.277]
241	200807_abd_cell1_db2b7.npz	[-13.5252]	[0.005]
242	200807_abd_cell1_db2b7.npz	[-10.1843]	[0.359]
243	200807_abd_cell1_db2b7.npz	[13.8315]	[2.661]
244	200807_abd_cell1_db2b7.npz	[12.1612]	[2.409]
245	200807_abd_cell1_db2b7.npz	[9.0038]	[1.533]
246	200807_abd_cell1_db2b7.npz	[14.3744]	[3.667]
247	200807_abd_cell1_db2b7.npz	[-13.5241]	[0.02]
248	200807_abd_cell1_db2b7.npz	[15.5336]	[0.718]
249	200807_abd_cell1_db2b7.npz	[-12.13]	[3.141]
250	200807_abd_cell1_db2b7.npz	[-11.7226]	[1.457]
251	200807_abd_cell1_db2b7.npz	[14.4428]	[0.065]
252	200807_abd_cell1_db2b7.npz	[15.6582]	[0.045]
253	200807_abd_cell1_db2b7.npz	[16.1362]	[0.458]
254	200807_abd_cell1_db2b7.npz	[15.1678]	[1.395]
255	200807_abd_cell1_db2b7.npz	[14.9899]	[0.049]
256	200808_abd_cell3_db2b16.npz	[9.423]	[0.05]
257	200808_abd_cell3_db2b16.npz	[13.3495]	[0.05]
258	200801_abd_new_gfpslips_db1b1.npz	[11.0757]	[5.396]
259	200831_abd_cell3_db1b7.npz	[2.0482]	[0.149]
260	200831_abd_cell3_db1b7.npz	[12.6526]	[1.501]
261	200809_abd_cell3_db2b6d.npz	[13.3562]	[35.664]
262	200809_abd_cell3_db2b6d.npz	[13.3341]	[9.0]
263	200809_abd_cell3_db2b6d.npz	[14.1158]	[39.381]
264	200807_abd_cell6_db1b10b.npz	[-11.9021]	[6.491]
265	200807_abd_cell6_db1b10b.npz	[12.7653]	[0.938]
266	200807_abd_cell6_db1b10b.npz	[-10.9823]	[0.257]
267	200807_abd_cell6_db1b10b.npz	[13.4833]	[0.233]
268	200807_abd_cell6_db1b10b.npz	[-12.0017]	[0.104]
269	200807_abd_cell6_db1b10b.npz	[-9.7085]	[0.142]
270	200807_abd_cell6_db1b10b.npz	[4.8395]	[1.247]
271	200807_abd_cell6_db1b10b.npz	[13.5654]	[0.017]
272	200807_abd_cell6_db1b10b.npz	[11.0461]	[0.561]
273	200807_abd_cell6_db1b10b.npz	[13.9366]	[0.596]
274	200807_abd_cell6_db1b10b.npz	[12.3492]	[0.029]
275	200807_abd_cell6_db1b10b.npz	[-13.7821]	[0.052]
276	200807_abd_cell6_db1b10b.npz	[-11.0713]	[0.101]
277	200807_abd_cell6_db1b10b.npz	[-8.6068]	[0.008]
278	200807_abd_cell6_db1b10b.npz	[-10.9233]	[0.442]
279	200807_abd_cell6_db1b10b.npz	[-12.9817]	[0.113]
280	200807_abd_cell6_db1b10b.npz	[-10.9992]	[1.503]
281	200807_abd_cell6_db1b10b.npz	[12.3598]	[0.195]
282	200807_abd_cell6_db1b10b.npz	[-10.8069]	[0.076]
283	200807_abd_cell6_db1b10b.npz	[-10.9499]	[16.934]
284	200807_abd_cell6_db1b10b.npz	[12.5085]	[0.188]
285	200807_abd_cell6_db1b10b.npz	[12.7296]	[2.929]
286	200807_abd_cell6_db1b10b.npz	[-10.6364]	[0.158]
287	200809_abd_cell2_db7b16.npz	[14.2438]	[5.904]
288	200809_abd_cell2_db7b16.npz	[-11.1318]	[0.051]
289	200809_abd_cell2_db7b16.npz	[-7.4391]	[0.035]
290	200809_abd_cell2_db7b16.npz	[-13.3625]	[0.716]
291	200809_abd_cell2_db7b16.npz	[-12.2077]	[0.143]
292	200809_abd_cell2_db7b16.npz	[-12.2845]	[0.435]
293	200809_abd_cell2_db7b16.npz	[14.3179]	[5.856]
294	200807_abd_cell4_db4b12.npz	[-13.4706]	[0.009]
295	200721_acatabd_cell2_db1b2.npz	[13.5091]	[14.459]
296	200721_acatabd_cell2_db1b2.npz	[14.8727]	[0.052]
297	200721_acatabd_cell2_db1b2.npz	[-13.878]	[0.013]
298	200721_acatabd_cell2_db1b2.npz	[-12.7749]	[7.35]
299	200721_acatabd_cell2_db1b2.npz	[-12.781]	[2.623]
300	200721_acatabd_cell2_db1b2.npz	[-5.6794]	[0.232]
301	200721_acatabd_cell2_db1b2.npz	[14.8173]	[0.259]
302	200721_acatabd_cell2_db1b2.npz	[1.8764]	[0.089]
303	200721_acatabd_cell2_db1b2.npz	[-9.0003]	[8.883]
304	200720_acatABDnolink_cell3_db3b5b.npz	[3.2344]	[0.114]
305	200720_acatABDnolink_cell3_db3b5b.npz	[-12.2033]	[0.242]
306	200720_acatABDnolink_cell3_db3b5b.npz	[13.4838]	[18.93]
307	200808_abd_cell3_db2b10b.npz	[14.2412]	[0.004]
308	200808_abd_cell3_db2b10b.npz	[12.5592]	[0.009]
309	200808_abd_cell3_db2b10b.npz	[-11.2675]	[0.016]
310	200808_abd_cell3_db2b10b.npz	[10.2226]	[0.005]
311	200808_abd_cell3_db2b10b.npz	[8.9935]	[0.02]
312	200808_abd_cell3_db2b10b.npz	[11.0537]	[0.024]
313	200808_abd_cell3_db2b10b.npz	[11.8897]	[0.205]
314	200808_abd_cell3_db2b10b.npz	[-11.7227]	[0.016]
315	200808_abd_cell3_db2b10b.npz	[9.0904]	[0.011]
316	200808_abd_cell3_db2b10b.npz	[-7.5655]	[0.017]
317	200720_acatABDnolink_cell2_db1b1.npz	[-13.0556]	[1.297]
318	200806_abd_cell3_db3b21.npz	[-8.4116]	[1.684]
319	200806_abd_cell3_db3b21.npz	[2.7848]	[0.011]
320	200806_abd_cell3_db3b21.npz	[15.8351]	[0.071]
321	200806_abd_cell3_db3b21.npz	[-14.0315]	[1.266]
322	200806_abd_cell3_db3b21.npz	[13.8389]	[0.286]
323	200806_abd_cell3_db3b21.npz	[1.7729]	[0.032]
324	200808_abd_cell3_db2b9.npz	[5.6377]	[0.01]
325	200808_abd_cell3_db2b9.npz	[14.7242]	[0.068]
326	200721_acatabd_cell1_db2b7.npz	[-15.0029]	[1.559]
327	200721_acatabd_cell1_db2b7.npz	[18.5665]	[0.011]
328	200721_acatabd_cell1_db2b7.npz	[-12.7101]	[1.443]
329	200721_acatabd_cell1_db2b7.npz	[19.4676]	[0.014]
330	200721_acatabd_cell1_db2b7.npz	[18.9797]	[0.026]
331	200721_acatabd_cell1_db2b7.npz	[-15.1187]	[0.314]
332	200721_acatabd_cell1_db2b7.npz	[19.4212]	[0.028]
333	200721_acatabd_cell1_db2b7.npz	[-13.0185]	[0.634]
334	200721_acatabd_cell1_db2b7.npz	[-4.6788]	[0.45]
335	200721_acatabd_cell1_db2b7.npz	[19.5196]	[0.044]
336	200721_acatabd_cell1_db2b7.npz	[18.9967]	[0.089]
337	200721_acatabd_cell1_db2b7.npz	[10.0813]	[0.685]
338	200721_acatabd_cell1_db2b7.npz	[17.939]	[0.003]
339	200721_acatabd_cell1_db2b7.npz	[18.7486]	[0.08]
340	200721_acatabd_cell1_db2b7.npz	[-14.2836]	[0.345]
341	200721_acatabd_cell1_db2b7.npz	[-14.0147]	[0.349]
342	200721_acatabd_cell1_db2b7.npz	[17.8876]	[0.035]
343	200721_acatabd_cell1_db2b7.npz	[-13.4086]	[0.072]
344	200721_acatabd_cell1_db2b7.npz	[19.5994]	[0.054]
345	200721_acatabd_cell1_db2b7.npz	[17.6723]	[0.212]
346	200721_acatabd_cell1_db2b7.npz	[-14.9463]	[0.115]
347	200721_acatabd_cell1_db2b7.npz	[-14.3283]	[0.252]
348	200721_acatabd_cell1_db2b7.npz	[3.8341]	[0.013]
349	200721_acatabd_cell1_db2b7.npz	[-14.213]	[0.017]
350	200721_acatabd_cell1_db2b7.npz	[-13.7864]	[2.733]
351	200721_acatabd_cell1_db2b7.npz	[-13.6959]	[0.365]
352	200721_acatabd_cell1_db2b7.npz	[7.3551]	[0.017]
353	200721_acatabd_cell1_db2b7.npz	[-15.0531]	[0.201]
354	200721_acatabd_cell1_db2b7.npz	[19.8742]	[0.039]
355	200721_acatabd_cell1_db2b7.npz	[-14.2285]	[1.611]
356	200721_acatabd_cell1_db2b7.npz	[17.7146]	[0.054]
357	200721_acatabd_cell1_db2b7.npz	[-12.6949]	[0.044]
358	200721_acatabd_cell1_db2b7.npz	[16.4365]	[0.099]
359	200721_acatabd_cell1_db2b7.npz	[18.2204]	[0.191]
360	200721_acatabd_cell1_db2b7.npz	[17.7536]	[0.048]
361	200721_acatabd_cell1_db2b7.npz	[-13.4653]	[0.006]
362	200721_acatabd_cell1_db2b7.npz	[18.2445]	[0.218]
363	200721_acatabd_cell1_db2b7.npz	[18.689]	[0.029]
364	200721_acatabd_cell1_db2b7.npz	[18.7646]	[0.072]
365	200721_acatabd_cell1_db2b7.npz	[17.4962]	[0.017]
366	200721_acatabd_cell1_db2b7.npz	[-12.2949]	[1.449]
367	200721_acatabd_cell1_db2b7.npz	[-13.8216]	[0.092]
368	200721_acatabd_cell1_db2b7.npz	[19.025]	[0.023]
369	200721_acatabd_cell1_db2b7.npz	[17.488]	[0.018]
370	200721_acatabd_cell1_db2b7.npz	[16.5325]	[0.033]
371	200721_acatabd_cell1_db2b7.npz	[17.7409]	[0.128]
372	200721_acatabd_cell1_db2b7.npz	[18.243]	[0.115]
373	200721_acatabd_cell1_db2b7.npz	[17.312]	[0.007]
374	200806_abd_cell3_db3b19.npz	[-17.1679]	[0.056]
375	200806_abd_cell3_db3b19.npz	[17.7777]	[0.046]
376	200806_abd_cell3_db3b19.npz	[18.6229]	[0.087]
377	200806_abd_cell3_db3b19.npz	[19.3501]	[0.041]
378	200721_acatabd_cell4_db1b1.npz	[-11.2161]	[6.286]
379	200720_acatABDnolink_cell3_db2b4.npz	[14.4574]	[1.396]
380	200720_acatABDnolink_cell3_db2b4.npz	[-13.3455]	[0.066]
381	200720_acatABDnolink_cell3_db2b4.npz	[-12.678]	[0.243]
382	200720_acatABDnolink_cell3_db2b4.npz	[14.9511]	[5.219]
383	200809_abd_cell2_db7b13.npz	[8.1876]	[0.077]
384	200809_abd_cell2_db7b13.npz	[11.0553]	[0.161]
385	200808_abd_cell4_db3b9.npz	[-9.5444]	[3.313]
386	200808_abd_cell4_db3b9.npz	[-13.9152]	[0.189]
387	200721_acatabd_cell3_db2b7.npz	[-13.3719]	[1.008]
388	200721_acatabd_cell3_db2b7.npz	[-15.1954]	[0.097]
389	200721_acatabd_cell3_db2b7.npz	[-13.491]	[12.897]
390	200721_acatabd_cell3_db2b7.npz	[-3.47]	[0.187]
391	200808_abd_cell3_db2b12.npz	[-11.4931]	[0.012]
392	200806_abd_cell3_db3b18.npz	[-11.9249]	[4.725]
393	200806_abd_cell3_db3b18.npz	[-10.32]	[2.294]
394	200806_abd_cell3_db3b18.npz	[-12.5466]	[0.642]
395	200806_abd_cell3_db3b18.npz	[17.112]	[0.064]
396	200831_abd_cell3_db1b3.npz	[-10.7123]	[0.307]
397	200807_abd_cell1_db2b8.npz	[-10.1406]	[1.013]
398	200807_abd_cell1_db2b8.npz	[-3.9153]	[0.115]
399	200807_abd_cell1_db2b8.npz	[-3.5159]	[0.215]
400	200807_abd_cell1_db2b8.npz	[7.1273]	[0.006]
401	200807_abd_cell1_db2b8.npz	[-10.1693]	[0.815]
402	200807_abd_cell1_db2b8.npz	[13.3064]	[0.429]
403	200807_abd_cell1_db2b8.npz	[6.7064]	[0.017]
404	200807_abd_cell1_db2b8.npz	[-10.4964]	[0.676]
405	200807_abd_cell1_db2b8.npz	[-8.9053]	[0.604]
406	200807_abd_cell1_db2b8.npz	[4.245]	[0.003]
407	200807_abd_cell1_db2b8.npz	[-7.7283]	[7.599]
408	200807_abd_cell1_db2b8.npz	[-8.9294]	[0.095]
409	200808_abd_cell1_db1b7.npz	[12.5014]	[0.004]
410	200808_abd_cell3_db2b10.npz	[-10.1895]	[0.014]
411	200808_abd_cell3_db2b10.npz	[-9.5001]	[0.011]
412	200808_abd_cell3_db2b10.npz	[14.2645]	[0.108]
413	200809_abd_cell3_db2b6b.npz	[8.599]	[21.151]
414	200809_abd_cell3_db2b6b.npz	[11.3751]	[0.076]
415	200809_abd_cell3_db2b6b.npz	[12.4564]	[38.41]
416	200807_abd_cell6_db1b10.npz	[13.9521]	[0.173]
417	200807_abd_cell6_db1b10.npz	[13.8531]	[1.016]
418	200807_abd_cell6_db1b10.npz	[12.6081]	[5.304]
419	200807_abd_cell6_db1b10.npz	[-8.268]	[1.985]
420	200807_abd_cell6_db1b10.npz	[13.54]	[5.789]
421	200807_abd_cell6_db1b10.npz	[11.6602]	[0.017]
422	200807_abd_cell6_db1b10.npz	[15.0746]	[0.491]
423	200807_abd_cell6_db1b10.npz	[11.8286]	[3.239]
424	200807_abd_cell6_db1b10.npz	[-11.9846]	[5.923]
425	200807_abd_cell6_db1b10.npz	[-11.7715]	[0.027]
426	200802_abd_cell1_db2b6.npz	[-7.0433]	[2.408]
427	200802_abd_cell1_db2b6.npz	[-12.3382]	[0.252]
428	200802_abd_cell1_db2b6.npz	[9.5841]	[6.945]
429	200802_abd_cell1_db2b6.npz	[-6.2518]	[1.944]
430	200802_abd_cell1_db2b6.npz	[16.124]	[0.459]
431	200802_abd_cell1_db2b6.npz	[-11.9774]	[2.483]
432	200802_abd_cell1_db2b6.npz	[-11.7009]	[0.454]
433	200721_acatabd_cell2_db3b6.npz	[-5.6795]	[1.245]
434	200721_acatabd_cell2_db3b6.npz	[14.4744]	[0.136]
435	200721_acatabd_cell2_db3b6.npz	[-11.3335]	[0.616]
436	200721_acatabd_cell2_db3b6.npz	[14.7279]	[0.368]
437	200809_abd_cell3_db2b6c.npz	[-9.168]	[0.057]
438	200809_abd_cell3_db2b6c.npz	[13.6297]	[6.163]
439	200719_acatABDnolnk_cell1_db3b3.npz	[-13.4632]	[0.132]
440	200719_acatABDnolnk_cell1_db3b3.npz	[13.4767]	[0.001]
441	200802_abd_cell1_db1b3.npz	[-9.281]	[0.008]
442	200801_cell3_abd_db1b1.npz	[-14.5521]	[0.054]
443	200801_cell3_abd_db1b1.npz	[-15.3186]	[0.014]
444	200801_cell3_abd_db2b10.npz	[14.6766]	[0.344]
445	200807_abd_cell1_db2b8d.npz	[14.6833]	[0.057]
446	200807_abd_cell1_db2b8d.npz	[12.364]	[0.191]
447	200807_abd_cell1_db2b8d.npz	[11.5225]	[1.262]
448	200807_abd_cell1_db2b8d.npz	[-2.5362]	[0.026]
449	200807_abd_cell1_db2b8d.npz	[13.9284]	[3.346]
450	200807_abd_cell1_db2b8d.npz	[-9.4645]	[0.068]
451	200807_abd_cell1_db2b8d.npz	[14.1913]	[0.671]
452	200807_abd_cell1_db2b8d.npz	[-11.4684]	[6.309]
453	200807_abd_cell1_db2b8d.npz	[-10.9699]	[0.074]
454	200807_abd_cell5_db2b8.npz	[9.6426]	[0.033]
455	200807_abd_cell5_db2b8.npz	[-12.0593]	[0.004]
456	200727_acatabd_cell1_db2b5.npz	[-5.5141]	[2.907]
457	200721_acatabd_cell4_db2b5.npz	[5.6021]	[0.019]
458	200721_acatabd_cell4_db2b5.npz	[-8.4194]	[2.93]
459	200721_acatabd_cell4_db2b4.npz	[3.0867]	[1.123]
460	200829_abd_cell2_d2b8.npz	[9.0195]	[0.196]
461	200809_abd_cell1_db1b2e.npz	[-12.2979]	[0.233]
462	200802_abd_cell1_db3b7.npz	[-11.4768]	[7.517]
463	200802_abd_cell1_db3b7.npz	[-12.9219]	[2.276]
464	200802_abd_cell1_db3b7.npz	[11.6146]	[0.263]
465	200802_abd_cell1_db3b7.npz	[16.2741]	[0.227]
466	200802_abd_cell1_db3b7.npz	[-3.2414]	[0.011]
467	200802_abd_cell1_db3b7.npz	[-12.6073]	[0.319]
468	200802_abd_cell1_db3b7.npz	[-13.4221]	[0.013]
469	200807_abd_cell2_db3b8.npz	[15.6063]	[0.197]
470	200807_abd_cell2_db3b8.npz	[-10.9542]	[19.1]
471	200807_abd_cell2_db3b8.npz	[-12.9003]	[8.554]
472	200807_abd_cell5_db3b10.npz	[-6.6811]	[0.026]
473	200809_abd_cell1_db1b2d.npz	[13.1975]	[0.159]
474	200809_abd_cell1_db1b2d.npz	[12.6954]	[2.139]
475	200809_abd_cell1_db1b2d.npz	[-7.294]	[0.03]
476	200807_abd_cell5_db3b12.npz	[-13.9829]	[0.029]
477	200721_acatabd_cell1_db2b7.npz	[15.7151]	[0.033]
478	200721_acatabd_cell1_db2b7.npz	[-11.1076]	[2.034]
479	200721_acatabd_cell1_db2b7.npz	[-11.8348]	[0.076]
480	200721_acatabd_cell1_db2b7.npz	[-7.4251]	[0.768]
481	200721_acatabd_cell1_db2b7.npz	[-11.7085]	[0.062]
482	200721_acatabd_cell1_db2b7.npz	[15.8456]	[0.36]
483	200721_acatabd_cell1_db2b7.npz	[17.8402]	[0.004]
484	200721_acatabd_cell1_db2b7.npz	[-10.4782]	[0.624]
485	200721_acatabd_cell1_db2b7.npz	[7.6155]	[0.051]
486	200721_acatabd_cell1_db2b7.npz	[-11.8074]	[0.187]
487	200721_acatabd_cell1_db2b7.npz	[-10.7311]	[0.255]
488	200721_acatabd_cell1_db2b7.npz	[8.3914]	[0.002]
489	200721_acatabd_cell1_db2b7.npz	[-11.3271]	[0.447]
490	200721_acatabd_cell1_db2b7.npz	[-11.4199]	[0.133]
491	200721_acatabd_cell1_db2b7.npz	[17.2589]	[0.171]
492	200721_acatabd_cell1_db2b7.npz	[-12.5841]	[0.105]
493	200721_acatabd_cell1_db2b7.npz	[18.4217]	[0.017]
494	200721_acatabd_cell1_db2b7.npz	[-6.7664]	[0.112]
495	200721_acatabd_cell1_db2b7.npz	[18.8357]	[0.013]
496	200721_acatabd_cell1_db2b7.npz	[14.2572]	[0.041]
497	200721_acatabd_cell1_db2b7.npz	[18.7401]	[0.049]
498	200721_acatabd_cell1_db2b7.npz	[5.9932]	[0.005]
499	200721_acatabd_cell1_db2b7.npz	[17.0022]	[0.121]
500	200721_acatabd_cell1_db2b7.npz	[15.5607]	[0.083]
501	200721_acatabd_cell1_db2b7.npz	[-13.1963]	[0.079]
502	200721_acatabd_cell1_db2b7.npz	[17.9453]	[0.18]
503	200721_acatabd_cell1_db2b7.npz	[16.8551]	[0.088]
504	200721_acatabd_cell1_db2b7.npz	[17.6088]	[0.018]
505	200721_acatabd_cell1_db2b7.npz	[12.0232]	[0.43]
506	200721_acatabd_cell1_db2b7.npz	[17.0317]	[0.003]
507	200721_acatabd_cell1_db2b7.npz	[-13.3282]	[0.956]
508	200721_acatabd_cell1_db2b7.npz	[5.7454]	[0.005]
509	200721_acatabd_cell1_db2b7.npz	[-13.3614]	[0.05]
510	200721_acatabd_cell1_db2b7.npz	[6.0741]	[0.007]
511	200721_acatabd_cell1_db2b7.npz	[11.5109]	[0.052]
512	200721_acatabd_cell1_db2b7.npz	[-13.775]	[0.466]
513	200721_acatabd_cell1_db2b7.npz	[18.6424]	[0.034]
514	200721_acatabd_cell1_db2b7.npz	[-13.0076]	[0.041]
515	200721_acatabd_cell1_db2b7.npz	[16.6371]	[0.068]
516	200721_acatabd_cell1_db2b7.npz	[18.7034]	[0.047]
517	200721_acatabd_cell1_db2b7.npz	[20.3112]	[0.006]
518	200721_acatabd_cell1_db2b7.npz	[13.73]	[0.504]
519	200721_acatabd_cell1_db2b7.npz	[16.2763]	[0.114]
520	200721_acatabd_cell1_db2b7.npz	[-13.8518]	[0.289]
521	200721_acatabd_cell1_db2b7.npz	[10.5281]	[0.238]
522	200721_acatabd_cell1_db2b7.npz	[16.8905]	[0.15]
523	200801_abd_new_gfpslips_cell2_db3b7.npz	[15.6454]	[0.085]
524	200801_abd_new_gfpslips_cell2_db3b7.npz	[-14.3335]	[5.882]
525	200801_abd_new_gfpslips_cell2_db3b7.npz	[-8.2452]	[7.025]
526	200801_abd_new_gfpslips_cell2_db3b7.npz	[-13.6367]	[0.451]
527	200801_abd_new_gfpslips_cell2_db3b7.npz	[15.7482]	[2.964]
528	200801_abd_new_gfpslips_cell2_db3b7.npz	[-12.8305]	[2.762]
529	200801_abd_new_gfpslips_cell2_db3b7.npz	[14.5113]	[0.191]
530	200801_abd_new_gfpslips_cell2_db3b7.npz	[15.3349]	[2.201]
531	200801_abd_new_gfpslips_cell2_db3b7.npz	[12.4503]	[7.343]
532	200721_acatabd_cell4_db2b3.npz	[5.6035]	[0.006]
533	200721_acatabd_cell4_db2b3.npz	[-4.8445]	[18.727]
534	200721_acatabd_cell4_db2b3.npz	[4.3344]	[0.088]
535	200721_acatabd_cell4_db2b3.npz	[-4.7847]	[0.02]
536	200721_acatabd_cell4_db2b3.npz	[6.5185]	[0.005]
537	200721_acatabd_cell4_db2b3.npz	[-4.1207]	[0.195]
538	200720_acatABDnolink_cell3_db3b5.npz	[12.3529]	[2.238]
539	200720_acatABDnolink_cell3_db3b5.npz	[14.766]	[0.351]
540	200720_acatABDnolink_cell3_db3b5.npz	[14.1375]	[5.527]
541	200720_acatABDnolink_cell3_db3b5.npz	[-9.0147]	[0.058]
542	200720_acatABDnolink_cell3_db3b5.npz	[14.1801]	[0.259]
543	200720_acatABDnolink_cell3_db3b5.npz	[-11.6241]	[0.122]
544	200720_acatABDnolink_cell3_db3b5.npz	[14.826]	[5.832]
545	200720_acatABDnolink_cell3_db3b5.npz	[-10.9744]	[0.104]
546	200720_acatABDnolink_cell3_db3b5.npz	[15.0668]	[0.574]
547	200720_acatABDnolink_cell3_db3b5.npz	[12.9849]	[1.223]
548	200720_acatABDnolink_cell3_db3b5.npz	[13.5075]	[0.413]
549	200720_acatABDnolink_cell3_db3b5.npz	[14.8945]	[0.586]
550	200720_acatABDnolink_cell3_db3b5.npz	[-5.5134]	[0.606]
551	200720_acatABDnolink_cell3_db3b5.npz	[-11.5926]	[0.803]
552	200720_acatABDnolink_cell3_db3b5.npz	[13.2815]	[3.252]
553	200720_acatABDnolink_cell3_db3b5.npz	[-11.2394]	[7.708]
554	200720_acatABDnolink_cell3_db3b5.npz	[14.7897]	[1.008]
555	200720_acatABDnolink_cell3_db3b5.npz	[-11.7444]	[0.304]
556	200720_acatABDnolink_cell3_db3b5.npz	[-10.8489]	[0.155]
557	200720_acatABDnolink_cell3_db3b5.npz	[-10.9606]	[10.631]
558	200807_abd_cell3_db2b8.npz	[-5.5027]	[1.951]
559	200807_abd_cell3_db2b8.npz	[13.087]	[0.068]
560	200809_abd_cell1_db3b10b.npz	[10.9048]	[0.468]
561	200807_abd_cell1_db2b8d.npz	[-5.7408]	[1.754]
562	200807_abd_cell1_db2b8d.npz	[15.2167]	[0.018]
563	200807_abd_cell1_db2b8d.npz	[13.783]	[0.05]
564	200807_abd_cell1_db2b8d.npz	[14.8494]	[0.175]
565	200807_abd_cell1_db2b8d.npz	[-11.5447]	[0.15]
566	200807_abd_cell1_db2b8d.npz	[12.0555]	[1.747]
567	200807_abd_cell1_db2b8d.npz	[-4.3075]	[0.145]
568	200807_abd_cell1_db2b8d.npz	[-2.9294]	[0.017]
