# Supplementary material for: Mechanism of the cadherin–catenin F-actin catch bond interaction
Source: eLife. 2022 Aug 1;11:e80130. doi: 10.7554/eLife.80130 (PMC9402232; doi:10.7554/eLife.80130)
Supplement: Figure 3—figure supplement 3—source data 2. [file elife-80130-fig3-figsupp3-data2.xlsx]

## Sheet: Sheet1
	file name	step forces	step lifetimes
0	181115haloaEdb1b1_120-end.npz	[10.2297]	[0.014]
1	181115haloaEdb1b1_120-end.npz	[12.1724]	[0.007]
2	190811_acatfl_db1b1_118.5-end.npz	[10.5325]	[0.127]
3	190811_acatfl_db1b1_118.5-end.npz	[-8.2648]	[0.009]
4	190811_acatfl_db1b1_118.5-end.npz	[-5.6818]	[0.008]
5	190811_acatfl_db1b1_118.5-end.npz	[2.9518]	[0.042]
6	190811_acatfl_db1b1_118.5-end.npz	[4.9578]	[0.004]
7	190811_acatfl_db1b1_118.5-end.npz	[-6.8936]	[0.009]
8	181115haloaEdb3b4_0-67s.npz	[-3.5635]	[0.008]
9	190729_acatFL_db1b1_0-82s.npz	[-10.1156]	[0.025]
10	190729_acatFL_db1b1_0-82s.npz	[-8.2173]	[0.008]
11	190729_acatFL_db1b1_0-82s.npz	[-9.1389]	[0.05]
12	190729_acatFL_db1b1_0-82s.npz	[-6.3216]	[0.037]
13	190729_acatFL_db1b1_0-82s.npz	[7.1982]	[1.704]
14	190729_acatFL_db1b1_0-82s.npz	[-8.1941]	[0.102]
15	190729_acatFL_db1b1_0-82s.npz	[-6.6926]	[0.014]
16	190729_acatFL_db1b1_0-82s.npz	[-7.4787]	[0.04]
17	190729_acatFL_db1b1_0-82s.npz	[11.8226]	[0.005]
18	190729_acatFL_db1b1_0-82s.npz	[-5.9867]	[0.007]
19	190729_acatFL_db1b1_0-82s.npz	[7.659]	[0.059]
20	190729_acatFL_db1b1_0-82s.npz	[-7.7859]	[0.033]
21	190729_acatFL_db1b1_0-82s.npz	[8.1974]	[2.554]
22	190623_acatfl_db2b6.npz	[-7.2056]	[15.874]
23	190729_acatFL_db1b1_82-120s.npz	[-4.5468]	[0.019]
24	190729_acatFL_db1b1_82-120s.npz	[3.3995]	[0.073]
25	190729_acatFL_db1b1_82-120s.npz	[-6.8968]	[0.009]
26	190729_acatFL_db1b1_82-120s.npz	[-5.3259]	[0.037]
27	190812_acatFL_cell4_db2b6.npz	[9.3603]	[0.806]
28	190812_acatFL_cell4_db2b6.npz	[-7.3132]	[0.422]
29	190812_acatFL_cell4_db2b6.npz	[14.3972]	[0.017]
30	190812_acatFL_cell4_db2b6.npz	[13.205]	[0.004]
31	190812_acatFL_cell4_db2b6.npz	[3.4317]	[0.007]
32	190812_acatFL_cell4_db2b6.npz	[-5.7334]	[0.006]
33	190812_acatFL_cell4_db2b6.npz	[6.7894]	[0.455]
34	190812_acatFL_cell4_db2b6.npz	[2.6687]	[0.256]
35	190812_acatFL_cell4_db2b6.npz	[11.6941]	[0.046]
36	190812_acatFL_cell4_db2b6.npz	[-8.8237]	[8.484]
37	181115haloaEdb1b1_30-120s.npz	[6.8594]	[2.198]
38	181115haloaEdb1b1_30-120s.npz	[-2.007]	[0.047]
39	190814_acatFL_cell4_db3b3.npz	[10.4289]	[0.01]
40	190814_acatFL_cell4_db3b3.npz	[7.7452]	[0.005]
41	190814_acatFL_cell3_db2b2.npz	[5.9151]	[0.012]
42	190814_acatFL_cell3_db2b2.npz	[-4.2629]	[0.008]
43	190814_acatFL_cell3_db2b2.npz	[-4.828]	[0.021]
44	190814_acatFL_cell3_db2b2.npz	[-4.386]	[0.003]
45	190812_acatFL_cell4_db2b8_178-end.npz	[-6.298]	[0.105]
46	190812_acatFL_cell4_db2b8_178-end.npz	[-3.3515]	[0.012]
47	190812_acatFL_cell4_db2b8_178-end.npz	[6.3269]	[9.067]
48	190812_acatFL_cell4_db2b8_178-end.npz	[6.8383]	[4.569]
49	190814_acatFL_cell2_db1b1.npz	[11.5303]	[0.421]
50	190814_acatFL_cell2_db1b1.npz	[-8.3297]	[0.104]
51	181115cell2db1b2_250s-end.npz	[-5.5576]	[1.12]
52	181115cell2db1b2_250s-end.npz	[6.8133]	[0.165]
53	181115cell2db1b2_250s-end.npz	[5.963]	[0.011]
54	190812_acatFL_cell5_db1b1.npz	[-3.8896]	[0.039]
55	190812_acatFL_cell4_db1b4.npz	[-7.4332]	[0.056]
56	190812_acatFL_cell4_db1b4.npz	[-4.041]	[0.011]
57	190812_acatFL_cell4_db1b4.npz	[-5.1972]	[0.049]
58	190812_acatFL_cell4_db1b4.npz	[-7.9025]	[0.064]
59	190811_acatfl_db1b1_0-118.5.npz	[-7.4349]	[0.353]
60	190811_acatfl_db1b1_0-118.5.npz	[-3.7468]	[0.015]
61	190814_acatFL_cell4_db4b5.npz	[4.41]	[0.032]
62	190814_acatFL_cell4_db4b5.npz	[7.641]	[0.878]
63	190814_acatFL_cell4_db4b5.npz	[7.5806]	[0.051]
64	190814_acatFL_cell4_db4b5.npz	[-8.266]	[0.027]
65	190812_acatFL_cell3_db4b5.npz	[9.6803]	[0.01]
66	190812_acatFL_cell2_db1b1.npz	[10.3136]	[0.153]
67	190811_acatfl_cell3_db2b5.npz	[10.0156]	[0.128]
68	190629_FLacat_db3b3.npz	[8.1052]	[0.041]
69	190629_FLacat_db3b3.npz	[-8.5967]	[0.052]
70	190629_FLacat_db3b3.npz	[9.3157]	[0.006]
71	190629_FLacat_db3b3.npz	[-4.3273]	[0.027]
72	181115haloaEdb3b4_200-300s.npz	[-7.3834]	[0.027]
73	181115haloaEdb3b4_200-300s.npz	[-6.8897]	[0.036]
74	181115haloaEdb3b4_200-300s.npz	[2.8834]	[0.811]
75	181115haloaEdb3b4_200-300s.npz	[3.5514]	[0.051]
76	190812_acatFL_cell4_db1b3.npz	[6.2965]	[3.74]
77	190811_acatfl_cell2_db1b1.npz	[-9.7163]	[1.159]
78	190811_acatfl_cell2_db1b1.npz	[-4.1182]	[1.566]
79	190812_acatFL_cell4_db1b2_70.6-end.npz	[-6.5872]	[0.015]
80	190812_acatFL_cell4_db1b2_70.6-end.npz	[-3.3883]	[0.021]
81	190812_acatFL_cell4_db1b2_70.6-end.npz	[3.5448]	[0.032]
82	190814_acatFL_cell3_db1b1.npz	[-5.4773]	[0.021]
83	190814_acatFL_cell3_db1b1.npz	[-6.4294]	[0.085]
84	190812_acatFL_cell4_db1b2_0-70.6.npz	[-6.7027]	[0.072]
85	190806_acatFL_db1b1.npz	[10.6033]	[0.356]
86	190806_acatFL_db1b1.npz	[5.7242]	[2.774]
87	190806_acatFL_db1b1.npz	[-12.5143]	[0.006]
88	190806_acatFL_db1b1.npz	[-11.9256]	[0.111]
89	190811_acatfl_cell2_db1b2.npz	[9.2074]	[0.093]
90	190811_acatfl_cell2_db1b2.npz	[-10.3413]	[0.097]
91	190729_acatFL_db1b1_120-end.npz	[-4.436]	[0.021]
92	190729_acatFL_db1b1_120-end.npz	[6.9299]	[0.129]
93	190729_acatFL_db1b1_120-end.npz	[-7.6911]	[0.011]
94	190729_acatFL_db1b1_120-end.npz	[-6.9761]	[0.052]
95	190423_fullacatdb2b3.npz	[-8.2919]	[0.006]
96	190814_acatFL_db4b7.npz	[2.1911]	[0.035]
97	190814_acatFL_db4b7.npz	[-7.9505]	[0.382]
98	190814_acatFL_db4b7.npz	[10.0207]	[9.057]
99	190814_acatFL_db4b7.npz	[9.8774]	[0.034]
100	190814_acatFL_db4b7.npz	[-7.5715]	[0.098]
101	190410_haloacat_d6b7.npz	[-1.4909]	[0.135]
102	190410_haloacat_d6b7.npz	[7.5376]	[0.006]
103	190410_haloacat_d6b7.npz	[-9.3229]	[0.006]
104	190410_haloacat_d6b7.npz	[8.668]	[0.006]
105	190410_haloacat_d6b7.npz	[8.5133]	[0.003]
106	190729_acatFL_db2b4.npz	[-9.0371]	[0.472]
107	190410_haloacat_d4b5.npz	[7.1428]	[0.005]
108	190410_haloacat_d4b5.npz	[-4.864]	[0.043]
109	190410_haloacat_d4b5.npz	[4.3372]	[0.026]
110	181115haloaEdb3b3.npz	[7.6389]	[2.676]
111	181115haloaEdb3b3.npz	[7.9921]	[4.479]
112	181115haloaEdb3b3.npz	[-5.6787]	[0.029]
113	181115haloaEdb3b3.npz	[7.2577]	[1.032]
114	181115cell2db2b4.npz	[-3.2558]	[0.025]
115	181115haloaEdb3b4_67-200s.npz	[3.8035]	[0.139]
116	181115haloaEdb3b4_67-200s.npz	[-8.0505]	[0.013]
117	181115haloaEdb3b4_67-200s.npz	[-7.3955]	[0.101]
118	181115haloaEdb3b4_300-end.npz	[-2.6529]	[0.04]
119	181115haloaEdb3b4_300-end.npz	[-6.1296]	[0.179]
120	190812_acatFL_cell4_db2b8_0-178.npz	[-6.0441]	[0.159]
121	190812_acatFL_cell4_db2b8_0-178.npz	[-5.8494]	[0.374]
122	190812_acatFL_cell4_db2b8_0-178.npz	[-5.7004]	[0.905]
123	190812_acatFL_cell4_db2b8_0-178.npz	[-4.9375]	[0.004]
124	190812_acatFL_cell4_db2b8_0-178.npz	[6.6855]	[1.314]
125	190420_fullacat_db3b3.npz	[11.7614]	[0.07]
126	181115cell2db1b2_0-250s.npz	[-6.5241]	[0.008]
127	181115cell2db1b2_0-250s.npz	[2.6937]	[0.007]
128	181115cell2db1b2_0-250s.npz	[-6.8723]	[0.011]
129	181115cell2db1b2_0-250s.npz	[4.8519]	[0.033]
130	190814_acatFL_db1b3.npz	[-2.3673]	[0.084]
131	190814_acatFL_db1b3.npz	[-8.8156]	[5.489]
132	190811_acatfl_cell3_aodxcal1.npz	[-7.5233]	[0.622]
133	190811_acatfl_cell3_aodxcal1.npz	[-7.2362]	[1.16]
134	190811_acatfl_cell3_aodxcal1.npz	[-7.5121]	[1.648]
135	190814_acatFL_db1b4.npz	[-8.0809]	[2.072]
136	190814_acatFL_db1b4.npz	[-12.8513]	[0.918]
137	190814_acatFL_db1b4.npz	[-9.5903]	[0.011]
138	190814_acatFL_db1b4.npz	[-6.3546]	[0.39]
139	190814_acatFL_db1b4.npz	[5.0957]	[0.012]
