# Supplementary material for: Mechanism of the cadherin–catenin F-actin catch bond interaction
Source: eLife. 2022 Aug 1;11:e80130. doi: 10.7554/eLife.80130 (PMC9402232; doi:10.7554/eLife.80130)
Supplement: Figure 3—figure supplement 3—source data 3. [file elife-80130-fig3-figsupp3-data3.xlsx]

## Sheet: Sheet1
	file name	step forces	step lifetimes
0	181115haloaEdb1b1_120-end	[6.0562 5.3684]	[0.195, 0.007]
1	181115haloaEdb1b1_120-end	[5.473 5.0569 4.1955 4.9975 4.1782 5.0517 4.242 ]	[0.024, 0.066, 2.304, 0.112, 0.725, 0.118, 0.065]
2	190811_acatfl_db1b1_118.5-end	[12.1692 11.5434 11.02 10.3983 10.6133 11.4791 11.108 10.2684 9.8824 7.1356 3.7157]	[0.49, 0.837, 0.268, 3.958, 14.62, 31.413, 0.013, 0.028, 1.968, 0.013, 0.172]
3	190811_acatfl_db1b1_118.5-end	[10.2204 8.2519]	[0.012, 0.271]
4	190811_acatfl_db1b1_118.5-end	[9.5688 7.8206]	[0.045, 0.282]
5	190811_acatfl_db1b1_118.5-end	[6.2556 4.5091]	[0.049, 0.026]
6	190811_acatfl_db1b1_118.5-end	[10.2803 8.0466]	[0.093, 0.013]
7	190811_acatfl_db1b1_118.5-end	[3.1851 7.3627]	[0.016, 0.458]
8	190811_acatfl_db1b1_118.5-end	[10.4173 9.7108 7.6491 4.2156]	[0.014, 0.222, 4.789, 0.05]
9	190811_acatfl_db1b1_118.5-end	[9.1437 5.3865 3.4008]	[0.141, 0.273, 0.215]
10	190811_acatfl_db1b1_118.5-end	[8.3821 6.6773 5.5897]	[0.014, 0.032, 0.005]
11	190811_acatfl_db1b1_118.5-end	[8.9498 7.8392 6.1515 5.3309 1.0564]	[0.012, 0.049, 3.58, 1.609, 0.015]
12	190811_acatfl_db1b1_118.5-end	[9.1003 6.7925]	[0.036, 0.043]
13	190811_acatfl_db1b1_118.5-end	[8.797 8.1003]	[0.063, 0.703]
14	190811_acatfl_db1b1_118.5-end	[7.2187 5.5075 3.4797]	[0.02, 0.035, 2.168]
15	190623_acatfl_db2b4	[14.5326 11.5393 3.9712]	[0.063, 0.406, 0.01]
16	190623_acatfl_db2b4	[17.9888 17.0983]	[0.005, 0.008]
17	190623_acatfl_db2b4	[16.9301 16.7193 14.8048 11.0579 9.4455]	[0.022, 0.209, 0.229, 1.681, 1.688]
18	190623_acatfl_db2b4	[9.6169 7.2207]	[0.192, 12.343]
19	190623_acatfl_db2b4	[11.5195 11.2395 9.9698 8.2881 6.8203]	[0.209, 2.026, 3.33, 8.38, 24.214]
20	181115haloaEdb3b4_0-67s	[6.8484 6.2364]	[0.125, 1.558]
21	181115haloaEdb3b4_0-67s	[4.6133 4.6217]	[0.071, 0.015]
22	181115haloaEdb3b4_0-67s	[5.8391 5.5939]	[0.029, 0.014]
23	181115haloaEdb3b4_0-67s	[8.0266 7.3807 6.3128]	[0.009, 0.085, 0.164]
24	190814_acatFL_cell4_db4b10	[13.3118 11.7588]	[0.055, 0.534]
25	190729_acatFL_db1b1_0-82s	[10.7644 6.5267]	[0.01, 0.003]
26	190729_acatFL_db1b1_0-82s	[10.5106 8.3366]	[0.005, 0.02]
27	190729_acatFL_db1b1_0-82s	[8.9933 7.4568]	[0.023, 0.07]
28	190729_acatFL_db1b1_0-82s	[8.8253 7.7809]	[0.007, 0.384]
29	190729_acatFL_db1b1_0-82s	[10.9756 7.1933]	[0.011, 2.823]
30	190729_acatFL_db1b1_0-82s	[10.7162 8.5515]	[0.006, 0.129]
31	190729_acatFL_db1b1_0-82s	[11.5201 8.6355]	[0.008, 0.669]
32	190729_acatFL_db1b1_0-82s	[10.7109 7.558 ]	[0.006, 0.047]
33	190729_acatFL_db1b1_0-82s	[10.3621 9.2085 8.4652 6.7541]	[0.031, 0.111, 0.603, 0.043]
34	190729_acatFL_db1b1_0-82s	[10.3002 8.5314]	[0.063, 0.037]
35	190729_acatFL_db1b1_0-82s	[8.0242 7.6617 7.4164]	[0.031, 0.129, 0.642]
36	190729_acatFL_db1b1_0-82s	[9.0196 7.3669]	[0.055, 0.448]
37	190729_acatFL_db1b1_0-82s	[11.753 10.5546]	[0.016, 0.379]
38	190729_acatFL_db1b1_0-82s	[3.8177 2.4465]	[0.015, 0.013]
39	190729_acatFL_db1b1_0-82s	[10.0012 9.3354]	[0.032, 0.247]
40	190729_acatFL_db1b1_0-82s	[10.7759 9.0149]	[0.005, 0.215]
41	190729_acatFL_db1b1_0-82s	[10.8524 8.8722 7.7373]	[0.015, 0.026, 0.028]
42	190729_acatFL_db1b1_0-82s	[8.1615 7.9027 7.4167]	[0.062, 0.724, 0.041]
43	190729_acatFL_db1b1_82-120s	[8.709 7.4072]	[0.005, 0.003]
44	190729_acatFL_db1b1_82-120s	[10.9523 9.5597 8.1318]	[0.015, 0.041, 0.107]
45	190729_acatFL_db1b1_82-120s	[11.8742 9.8999 7.2401]	[0.006, 0.012, 0.864]
46	190729_acatFL_db1b1_82-120s	[9.0064 7.6579]	[0.148, 0.654]
47	190729_acatFL_db1b1_82-120s	[13.1872 10.4903 8.684 ]	[0.03, 0.045, 1.114]
48	190729_acatFL_db1b1_82-120s	[10.442 7.8539]	[0.019, 0.689]
49	190729_acatFL_db1b1_82-120s	[10.2571 7.7266]	[0.008, 0.028]
50	190729_acatFL_db1b1_82-120s	[10.7768 7.3482 6.3929]	[0.009, 1.356, 0.658]
51	190729_acatFL_db1b1_82-120s	[8.6304 6.7777]	[0.054, 0.014]
52	190729_acatFL_db1b1_82-120s	[10.3454 9.7013 8.7555]	[0.948, 0.017, 1.249]
53	190729_acatFL_db1b1_82-120s	[8.9288 7.9083 0.5081]	[0.128, 0.457, 0.005]
54	190729_acatFL_db1b1_82-120s	[11.8963 9.4286]	[0.009, 0.837]
55	190729_acatFL_db1b1_82-120s	[7.2496 5.9512]	[0.163, 0.033]
56	190729_acatFL_db1b1_82-120s	[10.156 8.0008]	[0.036, 3.045]
57	190729_acatFL_db1b1_82-120s	[7.803 8.2669 5.1801]	[0.006, 0.051, 0.103]
58	190729_acatFL_db1b1_82-120s	[9.3177 7.5486]	[0.006, 0.114]
59	190729_acatFL_db1b1_82-120s	[11.9993 10.4097]	[0.037, 0.337]
60	190729_acatFL_db1b1_82-120s	[9.5022 7.1461 6.2794]	[0.657, 0.014, 0.373]
61	190729_acatFL_db1b1_82-120s	[11.5222 10.9906 9.7842]	[0.009, 0.053, 0.02]
62	190812_acatFL_cell4_db2b6	[9.9682 9.3403]	[0.006, 0.01]
63	190812_acatFL_cell4_db2b6	[8.8977 7.7552]	[0.053, 2.39]
64	190812_acatFL_cell4_db2b6	[13.1313 11.3137]	[0.32, 0.504]
65	190812_acatFL_cell4_db2b6	[8.9306 7.532 ]	[0.019, 2.148]
66	190812_acatFL_cell4_db2b6	[7.6557 7.3339]	[0.389, 1.06]
67	190812_acatFL_cell4_db2b6	[7.6104 6.751 6.2573]	[0.064, 0.569, 2.203]
68	190812_acatFL_cell4_db2b6	[11.5801 9.4431]	[0.013, 1.891]
69	190812_acatFL_cell4_db2b6	[13.6233 13.0552 11.5151]	[0.017, 6.328, 2.092]
70	190812_acatFL_cell4_db2b6	[8.7617 8.6585]	[0.017, 9.028]
71	181115haloaEdb1b1_30-120s	[5.3691 4.3446]	[0.548, 0.014]
72	181115haloaEdb1b1_30-120s	[9.2819 7.2257]	[0.024, 3.171]
73	181115haloaEdb1b1_30-120s	[4.9809 4.2449]	[0.658, 2.15]
74	181115haloaEdb1b1_30-120s	[6.6779 5.4454]	[0.11, 1.267]
75	181115haloaEdb1b1_30-120s	[5.7304 5.6796]	[0.039, 0.346]
76	181115haloaEdb1b1_30-120s	[7.6195 7.3145 5.6752]	[0.021, 0.029, 2.06]
77	181115haloaEdb1b1_30-120s	[3.478 3.3169]	[0.061, 0.093]
78	190814_acatFL_cell4_db3b3	[8.4155 7.5401]	[0.625, 0.111]
79	190814_acatFL_cell4_db3b3	[9.8893 8.8472]	[0.008, 0.023]
80	190814_acatFL_cell4_db3b3	[12.5827 10.9895]	[0.006, 0.005]
81	190814_acatFL_cell4_db3b3	[8.459 7.6861]	[0.013, 0.015]
82	190814_acatFL_cell4_db3b3	[8.4964 7.5124]	[0.077, 0.048]
83	190814_acatFL_cell4_db1b1	[9.3773 7.7517]	[0.068, 3.854]
84	190814_acatFL_cell4_db1b1	[5.3838 4.1409]	[0.154, 0.065]
85	190814_acatFL_cell4_db1b1	[9.6834 8.3525]	[0.018, 1.047]
86	190814_acatFL_cell3_db2b3	[7.568 5.773]	[2.058, 0.008]
87	190806_acatFL_db2b2	[8.4343 6.6003]	[0.048, 1.255]
88	190812_acatFL_cell5_db1b2	[9.6633 8.6555 6.4872 2.2536]	[2.431, 12.877, 0.017, 0.174]
89	190812_acatFL_cell5_db1b2	[11.034 7.9976]	[1.499, 108.805]
90	190812_acatFL_cell5_db1b2	[9.8496 9.4662 8.2412]	[0.294, 0.551, 0.088]
91	190812_acatFL_cell5_db1b2	[9.9793 9.5335 8.6649 5.7658 4.5792]	[0.104, 0.784, 0.069, 0.14, 0.011]
92	190812_acatFL_cell5_db1b2	[8.8969 6.2455 5.163 ]	[0.024, 0.154, 0.113]
93	190812_acatFL_cell5_db1b2	[ 9.5909 10.1833]	[0.041, 0.066]
94	190812_acatFL_cell5_db1b2	[6.7341 6.9013 4.4523 2.4558]	[0.023, 49.09, 2.438, 0.323]
95	190812_acatFL_cell5_db1b2	[9.1898 8.5137 7.4623]	[0.445, 0.012, 0.193]
96	190812_acatFL_cell5_db1b2	[9.4733 8.9041 7.1911 5.6757]	[0.023, 0.037, 0.318, 0.018]
97	190812_acatFL_cell5_db1b2	[9.388 9.0276 7.5172]	[0.075, 0.369, 0.01]
98	190812_acatFL_cell5_db1b2	[10.3264 7.9746 5.4003 4.1754 3.0883]	[0.025, 118.516, 0.306, 10.197, 5.286]
99	181115haloaEdb1b1_0-30s	[5.6317 5.2298 5.203 ]	[0.015, 0.08, 0.199]
100	181115haloaEdb1b1_0-30s	[6.2688 5.1715]	[0.014, 4.495]
101	181115haloaEdb1b1_0-30s	[6.2184 5.1592]	[0.032, 1.177]
102	181115haloaEdb1b1_0-30s	[5.547 4.424]	[0.037, 0.136]
103	181115haloaEdb1b1_0-30s	[7.6669 5.7802]	[0.038, 0.488]
104	181115haloaEdb1b1_0-30s	[3.6459 2.038 ]	[0.129, 0.117]
105	181115haloaEdb1b1_0-30s	[6.0489 4.9785]	[0.023, 1.279]
106	181115haloaEdb1b1_0-30s	[6.6955 5.2226]	[0.115, 0.88]
107	181115haloaEdb1b1_0-30s	[8.9049 8.537 6.8097 4.3137]	[0.018, 0.035, 1.119, 0.007]
108	181115haloaEdb1b1_0-30s	[6.0575 5.0467 4.8841]	[0.101, 0.198, 0.433]
109	181115haloaEdb1b1_0-30s	[6.1354 5.7116]	[0.103, 0.138]
110	181115haloaEdb1b1_0-30s	[7.9037 5.9672]	[0.03, 0.195]
111	190814_acatFL_cell3_db2b2	[9.473 7.4672]	[0.013, 0.086]
112	190814_acatFL_cell3_db2b2	[10.399 9.3238 8.3292]	[0.197, 0.747, 1.59]
113	190814_acatFL_cell3_db2b2	[8.996 8.0548 7.408 6.471 ]	[0.072, 0.067, 0.114, 1.791]
114	190814_acatFL_cell3_db2b2	[11.0202 9.7955 8.5391 7.4795]	[0.045, 0.144, 0.318, 0.028]
115	190814_acatFL_cell3_db2b2	[6.7551 5.0652 4.5836]	[0.026, 0.082, 0.044]
116	190814_acatFL_cell3_db2b2	[4.9666 5.2331 4.8854]	[0.039, 0.44, 0.072]
117	190814_acatFL_cell3_db2b2	[6.0765 1.312 ]	[0.022, 0.008]
118	190814_acatFL_cell3_db2b2	[7.311 5.9004 4.9753]	[0.02, 0.264, 0.185]
119	190814_acatFL_cell3_db2b2	[7.1506 5.7764]	[0.041, 0.037]
120	190814_acatFL_cell3_db2b2	[7.1328 5.8576 4.6395]	[0.026, 0.053, 0.084]
121	190814_acatFL_cell3_db2b2	[11.8072 9.576 8.0667 5.2752]	[0.183, 1.899, 6.244, 1.369]
122	190814_acatFL_cell3_db2b2	[3.931 3.2481]	[0.067, 0.257]
123	190814_acatFL_cell3_db2b2	[6.0382 4.5838]	[0.192, 0.754]
124	190812_acatFL_cell4_db2b8_178-end	[5.8477 5.0311]	[0.2, 0.062]
125	190812_acatFL_cell4_db2b8_178-end	[8.1788 7.6421 6.4007 5.2661]	[0.057, 0.073, 4.244, 0.957]
126	190812_acatFL_cell4_db2b8_178-end	[6.4905 6.3193]	[0.318, 0.526]
127	190812_acatFL_cell4_db2b8_178-end	[6.8663 5.4754]	[0.087, 1.466]
128	190812_acatFL_cell4_db2b8_178-end	[6.1606 5.1959]	[0.47, 0.06]
129	190812_acatFL_cell4_db2b8_178-end	[8.0166 6.2475]	[0.09, 4.089]
130	190812_acatFL_cell4_db2b8_178-end	[8.3359 7.0694 6.8337]	[0.012, 0.372, 0.07]
131	190814_acatFL_cell2_db1b1	[9.1949 6.5847]	[1.975, 2.204]
132	190814_acatFL_cell2_db1b1	[11.4449 8.4948 6.6713]	[0.032, 0.037, 0.63]
133	190814_acatFL_cell2_db1b1	[11.3575 8.5372 7.0186]	[0.02, 0.17, 0.664]
134	190814_acatFL_cell2_db1b1	[11.9211 7.8165 7.2441]	[0.36, 0.068, 0.109]
135	190814_acatFL_cell2_db1b1	[11.3782 7.903 ]	[0.059, 0.39]
136	181115cell2db1b2_250s-end	[5.6026 4.8206]	[0.05, 0.118]
137	181115cell2db1b2_250s-end	[6.6924 5.7595 5.3739 4.526 ]	[0.03, 0.358, 2.717, 4.917]
138	181115cell2db1b2_250s-end	[6.2889 6.1808 5.0223 4.9346 3.5953]	[0.046, 0.025, 1.886, 9.086, 0.037]
139	181115cell2db1b2_250s-end	[7.7735 6.6503 5.8773 5.2528]	[0.013, 0.129, 0.491, 0.1]
140	181115cell2db1b2_250s-end	[6.3117 5.5289 5.2779 4.8183]	[0.045, 0.139, 1.809, 0.212]
141	181115cell2db1b2_250s-end	[7.575 6.0762 5.2704]	[0.014, 0.093, 0.083]
142	181115cell2db1b2_250s-end	[6.9794 5.7106]	[0.014, 0.6]
143	181115cell2db1b2_250s-end	[7.2039 6.5902 5.8867]	[0.2, 0.088, 0.358]
144	181115cell2db1b2_250s-end	[5.6919 5.26 ]	[0.389, 0.398]
145	181115cell2db1b2_250s-end	[5.9069 5.5247]	[0.502, 1.614]
146	181115cell2db1b2_250s-end	[8.2799 6.7515 6.4218 5.6134 4.4944 4.2503]	[0.011, 0.019, 0.022, 0.195, 0.931, 0.441]
147	181115cell2db1b2_250s-end	[4.8148 3.7567]	[0.389, 0.147]
148	181115cell2db1b2_250s-end	[7.8271 6.6517 5.845 ]	[0.017, 0.24, 6.419]
149	181115cell2db1b2_250s-end	[7.4783 5.8827 4.5029 3.8328]	[0.013, 0.437, 0.764, 1.179]
150	181115cell2db1b2_250s-end	[6.3609 4.9729 4.4602]	[0.02, 1.128, 1.227]
151	181115cell2db1b2_250s-end	[6.8598 5.766 5.1455]	[0.016, 0.358, 1.153]
152	181115cell2db1b2_250s-end	[8.181 6.4734 5.9377 5.2785 5.3348]	[0.008, 0.492, 0.126, 1.495, 0.118]
153	190812_acatFL_cell5_db1b1	[9.6574 7.7699]	[0.253, 0.166]
154	190812_acatFL_cell5_db1b1	[8.1263 7.0735]	[0.019, 0.093]
155	190812_acatFL_cell5_db1b1	[9.7773 8.5534 7.3149]	[0.01, 0.206, 0.1]
156	190812_acatFL_cell5_db1b1	[12.1004 8.2149]	[0.011, 2.52]
157	190812_acatFL_cell5_db1b1	[12.6446 10.8302 10.1979 10.0552 7.8727]	[0.01, 0.222, 0.528, 0.975, 3.148]
158	190812_acatFL_cell5_db1b1	[12.6166 11.478 9.6147 6.7205 4.583 2.6297]	[0.106, 0.129, 20.415, 1.592, 0.834, 0.098]
159	190812_acatFL_cell5_db1b1	[9.9481 9.2108 7.7739]	[0.912, 0.12, 4.202]
160	190811_acatfl_cell3_db1b2	[7.1587 6.9509]	[0.024, 2.387]
161	190811_acatfl_cell3_db1b2	[11.4748 9.0567]	[0.006, 0.068]
162	190811_acatfl_cell3_db1b2	[8.8856 8.2796]	[0.068, 0.069]
163	190811_acatfl_cell3_db1b2	[8.4813 7.013 ]	[0.306, 1.968]
164	190811_acatfl_cell3_db1b2	[8.6327 6.8316]	[0.052, 0.114]
165	190811_acatfl_cell3_db1b2	[10.5505 10.2033 9.2878]	[0.05, 0.27, 1.103]
166	190811_acatfl_cell3_db1b2	[8.7474 6.4222]	[0.01, 1.645]
167	190811_acatfl_cell3_db1b2	[8.0637 7.8799 5.5258]	[0.019, 0.558, 1.287]
168	190812_acatFL_cell4_db1b4	[8.6316 8.5134 8.0955 7.9452]	[0.068, 0.36, 1.049, 0.062]
169	190812_acatFL_cell4_db1b4	[6.5796 5.2312]	[0.166, 0.102]
170	190812_acatFL_cell4_db1b4	[11.4258 11.0605]	[0.006, 0.15]
171	190812_acatFL_cell4_db1b4	[8.1368 7.2799]	[0.408, 2.235]
172	190812_acatFL_cell4_db1b4	[8.4563 7.8368]	[0.056, 0.028]
173	190812_acatFL_cell4_db1b4	[12.1892 9.4086]	[0.027, 2.105]
174	190812_acatFL_cell4_db1b4	[13.3679 10.9843 10.2556]	[0.011, 0.014, 0.327]
175	190812_acatFL_cell3_db2b2	[7.4993 5.726 4.4497 3.2847 1.6711]	[1.914, 0.062, 1.042, 0.109, 0.201]
176	190812_acatFL_cell3_db2b2	[9.7069 6.8685 4.4266]	[2.003, 3.043, 0.021]
177	190812_acatFL_cell3_db2b2	[ 9.7996 10.662 11.3309 14.4692 16.6369 15.8967 15.6063]	[0.05, 3.588, 6.369, 63.103, 0.486, 0.686, 4.057]
178	190811_acatfl_db1b1_0-118.5	[9.3207 7.2681 5.7593 3.3094]	[0.45, 2.458, 0.804, 0.087]
179	190811_acatfl_db1b1_0-118.5	[8.6199 8.7349 7.4365]	[0.271, 0.135, 2.543]
180	190811_acatfl_db1b1_0-118.5	[7.0009 2.4094]	[2.269, 0.009]
181	190811_acatfl_db1b1_0-118.5	[9.9656 7.5449]	[0.106, 0.839]
182	190811_acatfl_db1b1_0-118.5	[9.3212 8.1255]	[0.015, 0.535]
183	190811_acatfl_db1b1_0-118.5	[10.1488 8.2168 7.5099 6.7253 4.9327 5.9174 5.0499 3.3139]	[1.393, 0.019, 0.918, 0.285, 26.85, 0.149, 1.679, 0.135]
184	190811_acatfl_db1b1_0-118.5	[9.3757 7.5613 3.4133]	[0.37, 0.73, 0.024]
185	190811_acatfl_db1b1_0-118.5	[14.1218 9.4297 5.0448]	[0.055, 2.909, 0.161]
186	190811_acatfl_db1b1_0-118.5	[9.9175 6.3493 3.1505]	[0.131, 0.061, 0.639]
187	190811_acatfl_db1b1_0-118.5	[11.8258 10.0602 8.2978 7.4492 5.1956 3.3099 2.1748]	[0.023, 3.759, 1.268, 3.681, 0.04, 0.207, 0.206]
188	190811_acatfl_db1b1_0-118.5	[9.8254 7.4955 5.0998]	[0.013, 0.837, 0.063]
189	190812_acatFL_cell4_db1b5	[10.8551 8.7157]	[0.012, 0.126]
190	190814_acatFL_cell4_db4b5	[9.0757 7.3142 6.1422 4.0346]	[0.344, 2.169, 0.098, 0.319]
191	190814_acatFL_cell4_db4b5	[9.9719 7.8555]	[0.029, 5.069]
192	190814_acatFL_cell4_db4b5	[11.3904 9.3813 10.3745 10.3544]	[0.138, 4.443, 7.92, 8.646]
193	190814_acatFL_cell4_db4b5	[7.8948 7.3334]	[0.01, 0.05]
194	190814_acatFL_cell4_db4b5	[11.7173 8.9073 6.9725]	[0.01, 0.28, 0.057]
195	190814_acatFL_cell4_db4b5	[7.4057 8.5254 7.4422]	[0.016, 0.053, 4.146]
196	190814_acatFL_cell4_db4b5	[9.7304 8.7671]	[0.018, 0.441]
197	190814_acatFL_cell4_db4b5	[9.2359 6.7513]	[0.013, 0.277]
198	190814_acatFL_cell4_db4b5	[8.7041 7.9276]	[0.024, 3.818]
199	190814_acatFL_cell4_db4b5	[10.117 8.9918 7.8231]	[0.553, 7.556, 0.987]
200	190814_acatFL_cell4_db4b5	[11.7784 10.7271 8.3366]	[0.022, 0.054, 0.808]
201	190814_acatFL_cell4_db4b5	[11.1779 8.8647]	[0.017, 2.465]
202	190814_acatFL_cell4_db4b5	[9.6269 6.7213]	[0.011, 0.006]
203	190814_acatFL_cell4_db4b5	[7.1679 6.9555]	[0.02, 0.038]
204	190811_acatfl_cell3_db2b6	[9.3873 7.8707]	[0.024, 0.26]
205	190812_acatFL_cell3_db4b5	[4.6537 3.974 3.4539]	[0.15, 0.542, 3.857]
206	190812_acatFL_cell3_db4b5	[7.4555 6.1422 4.3331 3.7184]	[0.314, 17.594, 0.259, 0.131]
207	190812_acatFL_cell3_db4b5	[9.2396 7.4233 4.9906 3.2309 1.7519]	[0.265, 0.032, 2.767, 0.021, 0.069]
208	190812_acatFL_cell3_db4b5	[8.0296 6.5819 5.1577 4.4682 3.0803]	[0.02, 1.846, 0.036, 0.091, 0.037]
209	190812_acatFL_cell3_db4b5	[8.6465 7.2972 6.1961 5.2179]	[0.012, 0.166, 0.235, 3.196]
210	190812_acatFL_cell2_db1b1	[9.6049 9.3659 8.1629 6.2968]	[0.402, 0.308, 0.923, 0.686]
211	190812_acatFL_cell2_db1b1	[10.5002 9.6292]	[0.005, 0.339]
212	190811_acatfl_cell3_db2b5	[11.3855 9.9601]	[0.006, 0.004]
213	190811_acatfl_cell3_db2b5	[7.3968 5.6706]	[0.064, 0.368]
214	190811_acatfl_cell3_db2b5	[7.1297 6.1214]	[0.014, 0.01]
215	190811_acatfl_cell3_db2b5	[8.3723 6.2967 5.4275]	[0.016, 0.479, 0.491]
216	190814_acatFL_cell2_db2b3	[10.4666 9.1732 8.5489]	[0.023, 12.486, 11.318]
217	190623_acatfl_db1b2	[9.057 7.0745]	[0.005, 0.214]
218	190623_acatfl_db1b2	[4.8326 3.9172]	[0.079, 0.09]
219	190623_acatfl_db1b2	[6.8288 5.5402]	[0.036, 0.042]
220	190623_acatfl_db1b2	[7.0046 5.6393]	[0.261, 8.81]
221	190629_FLacat_db3b3	[7.1265 5.1091]	[0.241, 2.297]
222	190629_FLacat_db3b3	[11.4694 8.3325 6.1682]	[0.006, 0.433, 5.16]
223	190629_FLacat_db3b3	[4.1422 3.3353]	[0.078, 0.007]
224	190629_FLacat_db3b3	[8.7372 6.449 0.201 ]	[0.043, 0.465, 0.012]
225	190629_FLacat_db3b3	[13.3421 10.8844 9.9024 8.7914 7.5677]	[0.034, 0.587, 2.449, 13.921, 5.11]
226	190629_FLacat_db3b3	[9.0608 7.8935]	[0.018, 21.085]
227	181115haloaEdb3b4_200-300s	[8.7535 7.554 6.0134]	[0.113, 0.118, 0.203]
228	181115haloaEdb3b4_200-300s	[7.7453 6.1218 6.1828 5.8279]	[0.014, 0.518, 0.418, 5.528]
229	181115haloaEdb3b4_200-300s	[3.9298 3.6562 3.7251]	[0.031, 0.12, 0.073]
230	190812_acatFL_cell4_db1b3	[10.202 3.1064]	[0.024, 0.021]
231	190812_acatFL_cell4_db1b3	[5.8102 5.6362]	[0.016, 2.952]
232	190812_acatFL_cell4_db1b3	[9.1704 6.6293]	[0.262, 0.013]
233	190812_acatFL_cell4_db1b3	[8.7385 8.3439 7.8209 7.2463]	[0.017, 0.026, 0.631, 1.171]
234	190812_acatFL_cell4_db1b3	[9.8196 9.6374 6.9366 6.8046]	[0.027, 0.026, 1.702, 4.393]
235	190812_acatFL_cell4_db1b3	[7.5622 7.7388 7.5825]	[0.007, 0.1, 0.661]
236	190812_acatFL_cell4_db1b3	[7.9388 7.5294]	[0.324, 0.308]
237	190811_acatfl_cell2_db1b1	[6.5538 4.9297 4.5275]	[0.117, 1.146, 1.081]
238	190811_acatfl_cell2_db1b1	[12.9442 10.8661 9.2657]	[0.009, 0.012, 0.028]
239	190811_acatfl_cell2_db1b1	[10.6893 9.343 ]	[0.031, 0.046]
240	190811_acatfl_cell2_db1b1	[10.6469 7.0521]	[0.039, 0.011]
241	190811_acatfl_cell2_db1b1	[10.505 8.0991]	[0.482, 0.386]
242	190811_acatfl_cell2_db1b1	[7.1762 4.814 ]	[5.476, 5.243]
243	190811_acatfl_cell2_db1b1	[13.1587 12.3674 10.9768 9.2435]	[0.07, 0.096, 0.654, 0.035]
244	190811_acatfl_cell2_db1b1	[11.3153 8.8226]	[0.01, 0.155]
245	190811_acatfl_cell2_db1b1	[11.1414 8.5881]	[0.013, 0.069]
246	190811_acatfl_cell2_db1b1	[9.1776 8.94 6.5025]	[0.01, 0.222, 0.963]
247	190812_acatFL_cell4_db1b2_70.6-end	[8.5539 6.571 ]	[0.015, 1.101]
248	190812_acatFL_cell4_db1b2_70.6-end	[6.5588 5.1773]	[0.1, 0.673]
249	190812_acatFL_cell4_db1b2_70.6-end	[6.8213 5.7174]	[0.019, 0.011]
250	190812_acatFL_cell4_db1b2_70.6-end	[7.4347 6.0097]	[0.033, 0.503]
251	190812_acatFL_cell4_db1b2_70.6-end	[8.86 6.7283 6.1362]	[0.015, 0.173, 1.109]
252	190812_acatFL_cell4_db1b2_70.6-end	[7.7294 5.816 ]	[0.01, 1.744]
253	190812_acatFL_cell4_db1b2_70.6-end	[5.3606 4.7855]	[0.09, 0.458]
254	190812_acatFL_cell4_db1b2_70.6-end	[6.6206 5.5307]	[0.049, 0.08]
255	190812_acatFL_cell4_db1b2_70.6-end	[7.7441 6.8745]	[0.027, 0.318]
256	190812_acatFL_cell4_db1b2_70.6-end	[6.5134 4.6976]	[0.007, 0.012]
257	190814_acatFL_cell3_db1b1	[5.8634 1.5623]	[1.057, 0.006]
258	190814_acatFL_cell3_db1b1	[8.4093 7.1015]	[0.072, 0.045]
259	190814_acatFL_cell3_db1b1	[7.672 6.4751]	[0.342, 1.172]
260	190814_acatFL_cell3_db1b1	[6.6539 5.2025]	[0.116, 0.236]
261	190814_acatFL_cell3_db1b1	[9.983 8.2728]	[0.007, 0.013]
262	190814_acatFL_cell3_db1b1	[7.5141 6.202 1.2884]	[0.408, 0.805, 0.005]
263	190814_acatFL_cell3_db1b1	[10.1876 9.5925 8.2608]	[0.101, 0.021, 0.105]
264	190814_acatFL_cell3_db1b1	[8.7666 7.6495]	[0.192, 0.978]
265	190814_acatFL_cell3_db1b1	[8.3079 7.6429]	[0.117, 1.125]
266	190812_acatFL_cell4_db1b2_0-70.6	[8.8151 7.3098]	[0.006, 0.02]
267	190812_acatFL_cell4_db1b2_0-70.6	[8.6994 7.0774 5.9571 5.0655]	[0.019, 0.081, 0.731, 0.472]
268	190812_acatFL_cell4_db1b2_0-70.6	[7.6411 5.1801 3.8191]	[0.039, 1.034, 0.045]
269	190812_acatFL_cell4_db1b2_0-70.6	[8.3403 6.193 2.212 ]	[0.025, 0.312, 0.106]
270	190812_acatFL_cell4_db1b2_0-70.6	[6.8317 5.2437]	[0.028, 0.015]
271	190812_acatFL_cell4_db1b2_0-70.6	[10.3592 8.8541 7.365 5.2611]	[0.018, 0.039, 0.17, 0.501]
272	190812_acatFL_cell4_db1b2_0-70.6	[6.3685 4.8943]	[0.004, 0.256]
273	190812_acatFL_cell4_db1b2_0-70.6	[9.588 6.1902]	[0.049, 0.606]
274	190812_acatFL_cell4_db1b2_0-70.6	[10.1277 7.2965 5.3912]	[0.031, 0.056, 0.306]
275	190812_acatFL_cell4_db1b2_0-70.6	[10.878 9.5689]	[0.016, 0.63]
276	190812_acatFL_cell4_db1b2_0-70.6	[7.0651 5.113 ]	[0.026, 0.313]
277	190812_acatFL_cell4_db1b2_0-70.6	[9.0625 7.7688]	[0.011, 0.046]
278	190812_acatFL_cell4_db1b2_0-70.6	[11.227 9.948]	[0.007, 1.109]
279	190812_acatFL_cell4_db1b2_0-70.6	[ 9.3952 10.0635 7.7594]	[0.009, 0.152, 3.292]
280	190812_acatFL_cell4_db1b2_0-70.6	[8.5007 6.2288 5.2094]	[0.029, 0.402, 0.43]
281	190812_acatFL_cell4_db1b2_0-70.6	[7.7974 7.0526 5.5097]	[0.023, 0.103, 2.044]
282	190812_acatFL_cell4_db1b2_0-70.6	[5.3555 4.3744]	[0.062, 0.06]
283	190812_acatFL_cell4_db1b2_0-70.6	[5.9817 4.7506 4.0537]	[0.021, 0.032, 0.032]
284	190812_acatFL_cell4_db1b2_0-70.6	[8.2788 6.2189 5.0933]	[0.095, 1.266, 0.466]
285	190812_acatFL_cell4_db1b2_0-70.6	[5.0605 1.2388]	[0.466, 0.018]
286	190806_acatFL_db1b1	[12.2705 11.8137 11.066 9.9931]	[0.034, 0.118, 0.049, 3.473]
287	190806_acatFL_db1b1	[5.4057 4.7109]	[0.09, 0.179]
288	190806_acatFL_db1b1	[8.3757 7.6828]	[0.018, 0.277]
289	190806_acatFL_db1b1	[6.7442 5.2253]	[0.09, 0.146]
290	190806_acatFL_db1b1	[8.4204 6.5948 6.1541]	[0.008, 0.175, 0.16]
291	190806_acatFL_db1b1	[9.2443 9.5495 8.6697]	[0.009, 0.01, 6.671]
292	190811_acatfl_cell2_db1b2	[9.3334 4.4294]	[0.009, 0.008]
293	190811_acatfl_cell2_db1b2	[9.5038 7.2809 4.3801 2.3082]	[0.029, 11.761, 0.218, 0.052]
294	190811_acatfl_cell2_db1b2	[9.9405 9.2921 8.5003]	[0.121, 1.669, 0.127]
295	190811_acatfl_cell2_db1b2	[9.1054 8.0494]	[0.036, 2.261]
296	190811_acatfl_cell2_db1b2	[7.3142 6.3397 4.2463]	[1.451, 0.126, 0.242]
297	190811_acatfl_cell2_db1b2	[8.1825 7.5932]	[0.186, 0.072]
298	190811_acatfl_cell2_db1b2	[11.3276 9.8482 8.4179 4.7606]	[1.572, 2.279, 0.651, 1.251]
299	190811_acatfl_cell2_db1b2	[8.2198 8.826 ]	[0.066, 0.099]
300	190811_acatfl_cell2_db1b2	[12.1209 8.5862]	[0.407, 1.613]
301	190812_acatFL_cell1_db1b2	[8.9769 6.9909 5.8646]	[0.246, 0.387, 2.767]
302	190729_acatFL_db1b1_120-end	[8.1265 6.6911]	[0.036, 0.041]
303	190729_acatFL_db1b1_120-end	[12.1869 9.5122 7.9787]	[0.007, 0.542, 2.041]
304	190729_acatFL_db1b1_120-end	[7.7974 5.2343]	[0.008, 0.023]
305	190729_acatFL_db1b1_120-end	[9.1222 8.5083 6.5083]	[0.099, 0.022, 0.171]
306	190729_acatFL_db1b1_120-end	[9.4896 7.7831 6.4014]	[0.006, 0.017, 0.014]
307	190729_acatFL_db1b1_120-end	[4.5627 4.2758 3.335 ]	[0.084, 0.068, 0.203]
308	190729_acatFL_db1b1_120-end	[9.6333 7.1081]	[0.069, 0.525]
309	190729_acatFL_db1b1_120-end	[6.9098 5.0359]	[0.167, 1.218]
310	190729_acatFL_db1b1_120-end	[9.5665 7.6226]	[0.022, 0.062]
311	190729_acatFL_db1b1_120-end	[8.2472 7.1807]	[0.023, 0.162]
312	190729_acatFL_db1b1_120-end	[11.8024 10.9856 11.7154 11.5551 9.6038 7.1772 5.984 1.7795]	[0.196, 0.418, 14.959, 0.801, 0.774, 0.092, 0.571, 0.072]
313	190729_acatFL_db1b1_120-end	[9.2357 7.7329]	[0.067, 0.093]
314	190729_acatFL_db1b1_120-end	[11.3305 11.9872 12.0528 10.5564 8.2034 6.1496 3.9756]	[0.018, 13.553, 0.125, 1.498, 0.02, 0.288, 0.128]
315	190729_acatFL_db1b1_120-end	[8.3955 6.8951 4.6524]	[0.018, 0.201, 0.003]
316	190729_acatFL_db1b1_120-end	[12.1354 14.343 ]	[0.053, 69.615]
317	190812_acatFL_cell1_db1b3	[5.7428 4.3519]	[0.051, 0.117]
318	190423_fullacatdb2b3	[9.0992 7.7915 6.6338]	[0.118, 1.215, 0.154]
319	190423_fullacatdb2b3	[11.3093 10.921 ]	[0.024, 0.041]
320	190420_fullacat_db2b2	[8.7227 7.8174 7.3362]	[0.011, 0.033, 0.045]
321	190420_fullacat_db2b2	[7.1075 6.104 5.4395]	[0.055, 1.591, 0.06]
322	190420_fullacat_db2b2	[9.4799 8.258 ]	[0.018, 0.43]
323	190420_fullacat_db2b2	[8.1038 6.2945]	[0.004, 0.128]
324	190420_fullacat_db2b2	[8.0827 8.5828 7.5776 1.9469]	[0.017, 0.139, 0.618, 0.039]
325	190814_acatFL_db4b7	[9.1642 7.8735]	[0.254, 6.356]
326	190814_acatFL_db4b7	[8.265 8.527]	[0.069, 0.439]
327	190814_acatFL_db4b7	[5.2437 9.6064 8.5953 8.7913 8.7623 8.7626 5.9229]	[0.021, 0.086, 0.689, 3.464, 5.185, 7.824, 0.302]
328	190814_acatFL_db4b7	[9.1136 9.4028]	[0.007, 0.252]
329	190814_acatFL_db4b7	[8.0286 7.195 ]	[0.021, 0.136]
330	190814_acatFL_db4b7	[4.7331 3.8485]	[1.002, 0.447]
331	190814_acatFL_db4b7	[8.0677 7.7872]	[0.958, 2.462]
332	190814_acatFL_db4b7	[9.7083 9.967 9.2936]	[0.008, 4.037, 5.153]
333	190814_acatFL_db2b5	[9.4276 8.2917]	[1.468, 1.406]
334	190814_acatFL_db2b5	[10.1855 8.0128]	[0.05, 4.625]
335	190814_acatFL_db2b5	[9.0984 6.2067]	[0.016, 0.129]
336	190814_acatFL_db2b5	[6.4221 4.768 ]	[1.22, 1.259]
337	190410_haloacat_d6b7	[8.7035 7.711 ]	[0.004, 0.004]
338	190410_haloacat_d6b7	[8.9445 8.4022]	[0.011, 0.028]
339	190729_acatFL_db2b4	[11.4673 8.8841 7.8168 6.0645 3.2893]	[0.004, 0.07, 0.143, 0.058, 0.007]
340	190729_acatFL_db2b4	[11.1116 8.0607]	[0.035, 0.017]
341	190729_acatFL_db2b4	[8.3297 8.124 6.6905]	[0.008, 0.017, 0.078]
342	190729_acatFL_db2b4	[8.1929 7.1121]	[0.029, 1.707]
343	190729_acatFL_db2b4	[10.574 8.8894]	[0.006, 0.309]
344	190410_haloacat_d4b5	[8.6176 7.8164]	[0.028, 0.039]
345	190410_haloacat_d4b5	[7.6411 7.0176 5.6578 4.7119]	[0.031, 0.181, 32.777, 0.532]
346	190410_haloacat_d4b5	[5.2417 2.2236]	[0.057, 0.015]
347	190410_haloacat_d4b5	[6.3169 5.8893 5.3489]	[0.362, 0.797, 9.442]
348	190410_haloacat_d4b5	[6.1814 5.6205 5.6259 4.9774]	[0.017, 0.055, 0.149, 0.026]
349	190410_haloacat_d4b5	[4.9075 4.2442]	[0.011, 0.034]
350	190410_haloacat_d4b5	[6.7023 6.2077 4.3248]	[0.302, 7.578, 0.008]
351	190410_haloacat_d4b5	[6.6284 6.4877 4.022 ]	[0.838, 1.433, 0.223]
352	190410_haloacat_d4b5	[6.4734 5.5301 4.9397]	[0.038, 0.223, 0.526]
353	190410_haloacat_d4b5	[4.5284 1.5019]	[0.016, 0.01]
354	190410_haloacat_d4b5	[5.1713 4.0719 4.5588]	[0.219, 73.29, 0.075]
355	190410_haloacat_d4b5	[3.2243 2.9324 2.8656 2.109 ]	[0.081, 0.352, 1.262, 0.063]
356	190410_haloacat_d4b5	[3.6163 0.1915]	[0.519, 0.026]
357	190410_haloacat_d4b5	[3.2463 3.0172]	[0.056, 0.034]
358	190410_haloacat_d4b5	[3.3156 2.6948]	[0.19, 0.036]
359	181115haloaEdb3b3	[5.9649 5.99 ]	[0.024, 0.129]
360	181115haloaEdb3b3	[9.485 8.5945 7.9657]	[0.05, 0.009, 0.099]
361	181115haloaEdb3b3	[9.4506 7.5739 6.3894]	[0.008, 0.187, 0.026]
362	181115haloaEdb3b3	[8.6395 5.4908]	[0.006, 19.409]
363	181115haloaEdb3b3	[6.3693 5.587 ]	[0.02, 0.009]
364	181115haloaEdb3b3	[7.7284 6.4764 5.4092]	[0.057, 0.87, 8.776]
365	181115haloaEdb3b3	[9.2563 8.1511]	[0.042, 2.696]
366	181115cell2db2b4	[9.5335 7.3355]	[0.029, 1.083]
367	181115cell2db2b4	[10.5929 7.8707]	[0.007, 0.019]
368	181115cell2db2b4	[10.2225 7.8797]	[0.005, 0.709]
369	181115cell2db2b4	[9.317 8.0564 7.1617]	[0.009, 0.304, 0.039]
370	181115haloaEdb3b4_67-200s	[8.3555 6.707 ]	[0.01, 0.025]
371	181115haloaEdb3b4_67-200s	[5.7432 5.0495]	[0.047, 0.027]
372	181115haloaEdb3b4_67-200s	[9.0383 7.5105]	[0.119, 0.022]
373	181115haloaEdb3b4_67-200s	[10.7952 9.5 7.9464]	[0.014, 0.026, 0.049]
374	181115haloaEdb3b4_67-200s	[8.6154 7.1537]	[0.027, 0.131]
375	181115haloaEdb3b4_67-200s	[9.9121 7.2893]	[0.029, 7.291]
376	181115haloaEdb3b4_67-200s	[4.7416 4.6634 4.6205]	[0.172, 0.098, 0.017]
377	181115haloaEdb3b4_67-200s	[8.2627 6.3133]	[0.056, 0.058]
378	181115haloaEdb3b4_67-200s	[8.7749 7.208 7.0564 5.7065]	[0.026, 0.447, 0.735, 0.951]
379	181115haloaEdb3b4_67-200s	[8.4183 6.9923]	[0.04, 0.1]
380	181115haloaEdb3b4_67-200s	[3.0731 3.1803]	[0.045, 0.231]
381	181115haloaEdb3b4_67-200s	[9.6904 8.359 ]	[0.019, 0.077]
382	181115haloaEdb3b4_67-200s	[4.0558 3.5666]	[0.175, 0.152]
383	190814_acatFL_db1b2	[11.0372 8.433 7.544 6.554 ]	[0.063, 0.397, 0.153, 14.249]
384	190814_acatFL_db1b2	[11.8511 9.936 ]	[0.061, 0.162]
385	190814_acatFL_db1b2	[11.7013 10.4393 9.2823]	[0.147, 2.976, 1.509]
386	190814_acatFL_db1b2	[7.9954 6.3948 4.9233 3.4862]	[10.12, 24.674, 3.523, 0.089]
387	190814_acatFL_db1b2	[8.7803 9.5173 8.3766 6.3336 4.9536]	[0.016, 0.055, 0.012, 0.113, 0.434]
388	181115haloaEdb3b4_300-end	[7.0547 5.2095]	[0.101, 2.692]
389	181115haloaEdb3b4_300-end	[6.5332 4.8549]	[0.085, 0.092]
390	181115haloaEdb3b4_300-end	[7.3464 5.7526]	[0.131, 0.911]
391	181115haloaEdb3b4_300-end	[8.1888 6.5409 5.3048]	[0.014, 0.128, 0.217]
392	181115haloaEdb3b4_300-end	[7.9725 6.0334 5.4902]	[0.704, 12.816, 6.115]
393	181115haloaEdb3b4_300-end	[4.4154 4.3358]	[0.222, 0.335]
394	190717_FLacat_db2b2	[8.6706 7.2137 5.9604 3.9312]	[0.018, 0.085, 3.604, 0.062]
395	190717_FLacat_db2b2	[2.874 1.6061]	[0.073, 0.013]
396	190812_acatFL_cell4_db2b8_0-178	[10.949 7.4951 6.8687]	[0.017, 0.868, 0.667]
397	190812_acatFL_cell4_db2b8_0-178	[9.6979 7.5227 6.8231]	[0.02, 2.226, 0.159]
398	190812_acatFL_cell4_db2b8_0-178	[8.355 7.1553 6.9926 6.6568]	[0.005, 0.935, 0.514, 0.219]
399	190812_acatFL_cell4_db2b8_0-178	[6.8724 5.6154]	[0.401, 0.322]
400	190812_acatFL_cell4_db2b8_0-178	[8.0312 7.3655 6.4607]	[0.305, 0.075, 0.517]
401	190812_acatFL_cell4_db2b8_0-178	[6.7686 6.2306 6.2857 5.2489]	[0.009, 0.302, 0.925, 0.079]
402	190812_acatFL_cell4_db2b8_0-178	[6.6687 6.0271 5.9828 5.5663]	[0.098, 0.139, 3.429, 1.341]
403	190420_fullacat_db1b1	[9.1787 7.3973]	[0.15, 0.131]
404	181115cell2db1b2_0-250s	[5.965 5.7766 4.7241]	[0.019, 0.034, 0.036]
405	181115cell2db1b2_0-250s	[5.2579 4.5878]	[0.019, 0.388]
406	181115cell2db1b2_0-250s	[6.0189 4.9385 4.227 3.5825 3.5624]	[0.11, 2.507, 6.375, 2.688, 19.675]
407	181115cell2db1b2_0-250s	[7.342 6.6194]	[0.01, 0.012]
408	181115cell2db1b2_0-250s	[6.4914 6.4408 5.4988 5.0229 4.285 4.9417 4.0533 4.7733 3.8182]	[0.019, 0.486, 2.187, 10.487, 10.165, 0.093, 2.272, 0.258, 0.914]
409	181115cell2db1b2_0-250s	[4.9118 4.2455 3.5561]	[0.013, 0.044, 0.455]
410	181115cell2db1b2_0-250s	[5.5079 4.5075]	[0.04, 0.018]
411	181115cell2db1b2_0-250s	[6.6975 6.3107 5.3127]	[0.009, 0.034, 0.307]
412	181115cell2db1b2_0-250s	[5.9208 4.7808]	[0.009, 0.032]
413	190814_acatFL_db1b3	[7.7207 5.6438]	[0.016, 0.068]
414	190814_acatFL_db1b3	[11.2497 9.4858]	[0.006, 0.153]
415	190814_acatFL_db1b3	[ 9.9362 10.206 8.5122 6.8133]	[0.007, 0.018, 0.145, 0.005]
416	190814_acatFL_db1b3	[9.0351 7.4329]	[0.009, 0.216]
417	190814_acatFL_db1b3	[7.2415 5.0853]	[0.051, 2.171]
418	190814_acatFL_db1b3	[10.2195 7.5613]	[0.178, 0.685]
419	190814_acatFL_db1b3	[7.9705 9.4445]	[0.02, 0.061]
420	190814_acatFL_db1b3	[7.1041 5.4282]	[0.023, 0.012]
421	190814_acatFL_db1b3	[7.7557 6.8191 4.8336]	[0.196, 0.014, 0.022]
422	190814_acatFL_db1b3	[12.9578 12.5839 9.6389 8.478 7.5377 5.0952 3.7295]	[0.031, 0.139, 0.274, 3.828, 11.88, 36.008, 3.03]
423	190811_acatfl_cell3_aodxcal1	[9.8472 6.8934]	[0.012, 0.89]
424	190811_acatfl_cell3_aodxcal1	[12.039 9.2372 6.2834]	[0.036, 0.468, 0.026]
425	190811_acatfl_cell3_aodxcal1	[11.0161 8.7093]	[0.078, 0.258]
426	190811_acatfl_cell3_aodxcal1	[8.1041 5.8639]	[0.423, 0.038]
427	190811_acatfl_cell3_aodxcal1	[11.4359 10.9751 9.9973 2.2424]	[3.124, 0.034, 0.031, 0.009]
428	190811_acatfl_cell3_aodxcal1	[9.417 6.4104]	[0.008, 2.235]
429	190811_acatfl_cell3_aodxcal1	[7.7013 5.7254]	[0.036, 2.519]
430	190811_acatfl_cell3_aodxcal1	[10.5009 7.8404]	[0.175, 0.158]
431	190811_acatfl_cell3_aodxcal1	[7.7249 4.4842]	[0.486, 0.151]
432	190811_acatfl_cell3_aodxcal1	[11.8317 10.1742 7.4652]	[0.008, 0.02, 0.842]
433	190814_acatFL_db1b4	[9.9827 4.5741 7.4281 5.7599]	[0.133, 22.684, 1.495, 7.053]
434	190814_acatFL_db1b4	[10.0467 8.4188 7.5965]	[0.059, 0.171, 8.998]
435	190814_acatFL_db1b4	[9.4857 9.0934]	[0.188, 1.588]
436	190814_acatFL_db1b4	[9.2794 7.0837]	[0.026, 0.299]
437	190814_acatFL_db1b4	[9.1526 8.2085 7.306 ]	[2.401, 0.122, 0.339]
438	190814_acatFL_db1b4	[8.7174 9.1617]	[0.025, 0.078]
439	190814_acatFL_db3b6	[5.5064 4.7101 3.1934]	[0.022, 2.87, 0.044]
440	190410_haloacat_d5b6	[6.9867 5.4174]	[0.012, 1.001]
441	190410_haloacat_d5b6	[6.1975 5.3647 5.3176]	[0.028, 7.737, 17.729]
