# Supplementary material for: Mechanism of the cadherin–catenin F-actin catch bond interaction
Source: eLife. 2022 Aug 1;11:e80130. doi: 10.7554/eLife.80130 (PMC9402232; doi:10.7554/eLife.80130)
Supplement: Figure 3—source data 1. [file elife-80130-fig3-data1.xlsx]

## Sheet: Sheet1
	file name	step forces	step lifetimes
0	200802_abd_cell3_db2b3.npz	[14.9014 12.6352]	[3.622, 4.938]
1	200802_abd_cell3_db2b3.npz	[-14.0002 -10.3911]	[7.561, 3.74]
2	200802_abd_cell3_db2b3.npz	[15.8742 15.4264 14.5493 11.5077 8.4414]	[1.635, 0.602, 0.487, 3.084, 3.626]
3	200802_abd_cell3_db2b3.npz	[-15.5213 -14.9019 -13.5844 -11.2994 -9.5814 -7.6131]	[0.012, 2.068, 5.775, 49.449, 5.354, 30.972]
4	200805_abd_cell2_db1b7.npz	[16.0354 15.2725 11.8025 7.9202]	[36.017, 0.031, 3.683, 1.097]
5	200805_abd_cell2_db1b7.npz	[-11.6688 -10.6513 -10.5557 -8.9751 -7.6907 -6.1768]	[0.517, 0.167, 0.182, 0.487, 0.04, 0.446]
6	200805_abd_cell2_db1b7.npz	[12.2267 10.5373 9.7064]	[14.632, 36.793, 0.03]
7	200802_abd_cell4_db3b7.npz	[16.8831 16.4641 14.8723]	[0.007, 0.006, 0.037]
8	200719_acatnolnk_cell2_db3b3.npz	[-7.9592 -5.0981]	[41.807, 0.25]
9	200719_acatnolnk_cell2_db3b3.npz	[-7.724 -6.1209]	[9.786, 1.798]
10	200719_acatnolnk_cell2_db3b3.npz	[-9.7359 -8.2053]	[0.816, 1.173]
11	200720_acatABDnolink_cell1_db2b2.npz	[18.1224 16.3367 14.4503 12.7129 11.6657 10.0645 7.1232 1.0925]	[0.005, 0.073, 2.553, 0.408, 6.008, 0.135, 0.04, 0.019]
12	200720_acatABDnolink_cell1_db2b2.npz	[17.8962 15.2271]	[0.04, 0.066]
13	200720_acatABDnolink_cell1_db2b2.npz	[10.773 9.9549]	[0.007, 0.23]
14	200802_abd_cell1_db3b9.npz	[13.8082 14.8804 14.0112 12.4731 10.5625 7.2474 6.0022 6.7303]	[0.007, 0.185, 0.082, 20.77, 1.392, 0.323, 1.991, 9.252]
15	200802_abd_cell1_db3b9.npz	[12.9972 12.2499 8.7395 7.1131 5.7531 4.3678]	[2.108, 5.335, 0.278, 30.814, 1.054, 0.523]
16	200802_abd_cell1_db3b9.npz	[-9.5292 -7.7177 -6.3385]	[10.235, 0.77, 1.437]
17	200802_abd_cell1_db3b9.npz	[14.5729 13.2817 11.2071 8.195 6.3168 4.4063]	[2.781, 12.528, 2.355, 3.569, 0.688, 2.74]
18	200802_abd_cell1_db3b9.npz	[-11.8358 -11.2559 -8.517 -7.6489]	[0.253, 0.531, 1.675, 2.139]
19	200802_abd_cell1_db3b9.npz	[15.6969 14.6781 13.4565]	[0.02, 0.227, 0.027]
20	200806_abd_cell3_db3b12b.npz	[-10.4638 -10.0265]	[1.127, 0.73]
21	200809_abd_cell4_db3b11.npz	[-14.4095 -13.1155]	[0.013, 0.836]
22	200809_abd_cell4_db3b11.npz	[-22.6121 -18.2374 -11.0163 -8.6389]	[7.349, 112.079, 0.037, 0.173]
23	200721_acatabd_cell4_db4b8.npz	[-11.3495 -9.5949 -4.7349]	[0.526, 4.055, 93.658]
24	200721_acatabd_cell4_db4b8.npz	[11.8711 10.0329 8.3103 6.9122]	[6.933, 1.231, 5.313, 0.06]
25	200721_acatabd_cell4_db4b8.npz	[-12.3979 -8.0792 -4.8874 -2.5745]	[80.934, 0.363, 79.594, 0.087]
26	200808_abd_cell4_db2b4.npz	[14.7287 14.8721]	[0.039, 7.533]
27	200721_acatabd_cell1_db2b3.npz	[-11.3979 -9.553 -7.0445 -5.2226 -3.8416 -3.3345 -2.163 ]	[1.005, 0.626, 0.443, 1.295, 0.363, 0.081, 0.191]
28	200721_acatabd_cell1_db2b3.npz	[-12.057 -11.3634]	[6.137, 1.306]
29	200809_abd_cell4_db2b7.npz	[15.4924 15.2471 15.5218]	[0.028, 0.215, 0.901]
30	200829_abd_cell1_db3b5.npz	[-12.9908 -12.5649 -11.9075 -11.0806 -7.7027 -5.4217 -4.5683 -3.4208]	[0.025, 0.221, 0.219, 0.159, 0.03, 0.512, 0.319, 1.716]
31	200829_abd_cell1_db3b5.npz	[14.0497 13.1343 12.2662 11.7398 10.1918 9.2003]	[0.039, 0.046, 0.05, 0.756, 0.017, 0.351]
32	200829_abd_cell1_db3b5.npz	[-12.6793 -11.5938 -6.677 ]	[0.046, 0.036, 25.568]
33	200829_abd_cell1_db3b5.npz	[13.7108 12.9014 11.997 11.09 ]	[0.011, 0.224, 0.72, 4.197]
34	200829_abd_cell1_db3b5.npz	[14.0045 11.9665]	[0.502, 0.035]
35	200829_abd_cell1_db3b5.npz	[14.241 13.5632]	[0.246, 2.098]
36	200829_abd_cell1_db3b5.npz	[-13.5197 -12.5503 -10.9087]	[0.018, 0.016, 2.047]
37	200829_abd_cell1_db3b5.npz	[14.0084 14.9297 13.9635 13.489 13.3426]	[0.032, 0.584, 0.355, 0.064, 0.386]
38	200829_abd_cell1_db3b5.npz	[13.9996 12.5152 11.5191 11.0571 10.4826 10.022 8.478 7.2592]	[0.3, 1.589, 1.255, 1.455, 1.013, 5.378, 0.034, 0.37]
39	200829_abd_cell1_db3b5.npz	[14.9935 14.537 13.5867 12.2472 4.4383]	[0.092, 6.894, 2.38, 7.673, 6.37]
40	200801_abd_new_gfpslips_cell2_db3b9.npz	[15.0547 14.3321]	[0.061, 4.541]
41	200807_abd_cell1_db2b8.npz	[-10.6364 -10.4436 -6.5161 -3.7925 -0.9144]	[0.253, 0.422, 0.294, 0.059, 0.016]
42	200807_abd_cell1_db2b8.npz	[-12.0084 -11.5839 -11.4284]	[0.033, 0.26, 0.182]
43	200807_abd_cell1_db2b8.npz	[11.1067 8.9959]	[3.734, 0.922]
44	200807_abd_cell1_db2b8.npz	[-8.4788 -8.0281]	[0.035, 0.413]
45	200807_abd_cell1_db2b8.npz	[-10.3315 -10.0821 -1.4346]	[0.156, 0.505, 0.031]
46	200807_abd_cell1_db2b8.npz	[13.2657 13.1215]	[0.119, 0.321]
47	200807_abd_cell1_db2b8.npz	[-11.65 -11.3082]	[0.355, 0.39]
48	200807_abd_cell1_db2b8.npz	[11.5423 11.139 11.1168]	[0.081, 0.129, 3.188]
49	200807_abd_cell1_db2b8.npz	[-11.1022 -10.8206 -10.5341]	[0.599, 2.455, 2.38]
50	200807_abd_cell1_db2b8.npz	[-11.7354 -11.7889]	[1.088, 0.885]
51	200807_abd_cell1_db2b8.npz	[-11.4495 -1.4878]	[0.452, 0.045]
52	200807_abd_cell1_db2b8.npz	[11.8864 11.7746]	[0.553, 0.329]
53	200807_abd_cell1_db2b8.npz	[-11.2839 -7.8606 -7.2761]	[2.848, 3.925, 0.07]
54	200807_abd_cell1_db2b8.npz	[-10.9976 -10.6215]	[0.763, 0.243]
55	200807_abd_cell1_db2b8.npz	[-9.4908 -8.9897]	[1.428, 27.218]
56	200719_acatnolnk_cell3_db2b2.npz	[-14.5432 -13.7789]	[0.005, 0.016]
57	200807_abd_cell6_db1b10.npz	[-13.3263 -13.0399 -12.7019 -12.9813 -12.8167]	[0.316, 0.329, 0.5, 0.618, 0.544]
58	200807_abd_cell6_db1b10.npz	[10.2696 9.6084]	[0.061, 1.93]
59	200807_abd_cell6_db1b10.npz	[-11.8417 -10.4769]	[0.669, 0.011]
60	200807_abd_cell6_db1b10.npz	[13.7654 13.668 13.0274]	[0.012, 0.025, 0.007]
61	200807_abd_cell6_db1b10.npz	[15.067 14.1017]	[0.028, 0.218]
62	200807_abd_cell6_db1b10.npz	[-12.9936 -12.6392]	[0.105, 1.43]
63	200807_abd_cell6_db1b10.npz	[-12.8506 -12.6694]	[0.203, 0.115]
64	200807_abd_cell6_db1b10.npz	[14.1076 14.0101]	[0.453, 0.706]
65	200807_abd_cell6_db1b10.npz	[12.4734 1.5631]	[0.073, 0.022]
66	200807_abd_cell6_db1b10.npz	[-12.6434 -12.4227]	[0.462, 5.311]
67	200807_abd_cell6_db1b10.npz	[13.2416 12.9615]	[0.029, 0.044]
68	200807_abd_cell6_db1b10.npz	[-10.8015 -10.4407]	[0.081, 0.768]
69	200807_abd_cell6_db1b10.npz	[-13.2244 -12.9979]	[0.15, 0.907]
70	200807_abd_cell6_db1b10.npz	[12.7271 11.7455]	[0.046, 1.155]
71	200807_abd_cell6_db1b10.npz	[-8.2573 -8.11 -8.0623]	[0.037, 0.141, 2.813]
72	200807_abd_cell6_db1b10.npz	[-12.7571 -12.022 ]	[0.089, 10.974]
73	200807_abd_cell6_db1b10.npz	[-12.9935 -13.8665]	[0.037, 1.891]
74	200807_abd_cell6_db1b10.npz	[13.2397 12.1194]	[0.02, 1.896]
75	200807_abd_cell6_db1b10.npz	[-8.6078 -9.6304]	[0.035, 0.22]
76	200807_abd_cell6_db1b10.npz	[-12.8963 -12.7297]	[0.25, 0.84]
77	200807_abd_cell6_db1b10.npz	[13.2175 12.668 ]	[0.071, 0.394]
78	200807_abd_cell6_db1b10.npz	[-13.1864 -12.5221 -12.4045]	[0.055, 0.419, 6.64]
79	200807_abd_cell6_db1b10.npz	[13.6223 13.2417]	[2.369, 0.847]
80	200807_abd_cell6_db1b10.npz	[-12.4774 -12.3106 -12.1358]	[0.085, 0.639, 1.538]
81	200807_abd_cell6_db1b10.npz	[-12.1708 -12.0826]	[0.482, 1.039]
82	200807_abd_cell6_db1b10.npz	[11.676 10.9627 10.7605]	[0.068, 0.055, 0.386]
83	200807_abd_cell6_db1b10.npz	[14.1382 13.5826]	[0.035, 8.569]
84	200807_abd_cell6_db1b10.npz	[14.8908 14.525 13.7849]	[0.379, 0.367, 0.909]
85	200807_abd_cell6_db1b10.npz	[12.7168 11.9532 11.5817]	[0.319, 0.582, 0.731]
86	200807_abd_cell6_db1b10.npz	[-12.2238 -11.7889]	[0.057, 0.065]
87	200807_abd_cell6_db1b10.npz	[15.2708 14.5928 4.9381]	[0.016, 0.413, 3.084]
88	200807_abd_cell6_db1b10.npz	[-11.7479 -11.4335]	[0.059, 1.426]
89	200807_abd_cell6_db1b10.npz	[14.1185 12.9854]	[0.064, 2.467]
90	200805_abd_cell2_db1b1.npz	[14.5521 13.7355]	[0.004, 0.017]
91	200805_abd_cell2_db1b1.npz	[14.1883 13.0407]	[0.048, 0.159]
92	200727_acatabd_cell3_db3b3.npz	[-8.4725 -7.3575]	[0.053, 5.775]
93	200809_abd_cell2_db2b4.npz	[-12.6732 -12.6754 -11.1862 -6.4838]	[0.474, 3.548, 0.266, 36.327]
94	200807_abd_cell5_db2b5.npz	[-5.4433 -4.1332]	[0.365, 0.283]
95	200721_acatabd_cell1_db2b5.npz	[-13.419 -13.077 -12.3915]	[0.061, 0.043, 0.541]
96	200721_acatabd_cell1_db2b5.npz	[-13.8458 -12.6104]	[0.024, 1.451]
97	200721_acatabd_cell1_db2b5.npz	[-12.4527 -11.8685]	[0.674, 0.277]
98	200801_abd_new_gfpslips_db4b9.npz	[-3.5171 -2.623 ]	[1.891, 15.814]
99	200801_abd_new_gfpslips_db4b9.npz	[-8.6707 -6.6244 -5.5338]	[7.249, 4.268, 29.012]
100	200807_abd_cell3_db3b10.npz	[-11.6307 -7.7997]	[0.987, 22.454]
101	200807_abd_cell3_db3b10.npz	[-13.1933 -11.9408]	[1.891, 2.428]
102	200807_abd_cell3_db3b10.npz	[-6.2198 -5.1007]	[2.011, 0.069]
103	200807_abd_cell3_db3b10.npz	[-13.5672 -10.3445 -7.8341 -6.5445]	[15.928, 7.129, 9.268, 14.409]
104	200807_abd_cell3_db3b10.npz	[ 9.4416 10.0115]	[0.043, 2.61]
105	200807_abd_cell3_db3b10.npz	[8.9316 8.3987 8.1222]	[0.03, 2.97, 9.888]
106	200807_abd_cell3_db3b10.npz	[-11.4673 -11.0763 -10.3735 -7.1407]	[0.513, 2.431, 1.771, 21.865]
107	200807_abd_cell3_db3b10.npz	[9.598 8.3409 5.3547 4.791 2.4652]	[0.279, 1.629, 0.481, 0.428, 0.022]
108	200807_abd_cell3_db3b10.npz	[-14.0455 -1.8516]	[0.295, 0.069]
109	200807_abd_cell3_db3b10.npz	[9.7421 8.7055 7.445 3.9128]	[0.021, 0.182, 1.751, 0.006]
110	200807_abd_cell3_db3b10.npz	[-11.908 -9.707 -9.2298 -5.8816]	[0.504, 0.369, 5.725, 15.057]
111	200807_abd_cell3_db3b10.npz	[8.2717 7.8955]	[4.757, 4.239]
112	200807_abd_cell3_db3b10.npz	[-9.0625 -7.2612 -5.8161 -5.0202]	[2.914, 0.061, 0.198, 0.159]
113	200807_abd_cell3_db3b10.npz	[-8.4282 -6.5178 -3.8491]	[0.037, 10.669, 0.011]
114	200807_abd_cell3_db3b10.npz	[-5.3455 -3.3797]	[0.047, 0.027]
115	200809_abd_cell1_db3b10.npz	[12.6427 12.5831 13.087 ]	[0.077, 14.633, 11.475]
116	200809_abd_cell1_db3b10.npz	[-13.6989 -12.3743 -11.8268]	[0.027, 0.862, 11.675]
117	200809_abd_cell1_db3b10.npz	[-12.9602 -12.6048]	[0.459, 5.846]
118	200809_abd_cell1_db3b10.npz	[9.5433 9.9012 9.9122 9.722 ]	[0.043, 0.133, 0.218, 6.342]
119	200809_abd_cell1_db3b10.npz	[-14.1858 -13.8506 -13.8368]	[0.039, 0.217, 0.445]
120	200809_abd_cell1_db3b10.npz	[12.8541 13.1762 13.0737]	[0.04, 3.395, 0.324]
121	200809_abd_cell1_db3b10.npz	[-8.6341 -7.9474]	[0.086, 9.893]
122	200809_abd_cell1_db3b10.npz	[-13.0907 -12.759 ]	[0.337, 0.166]
123	200809_abd_cell1_db3b10.npz	[-13.3684 -13.2361]	[0.63, 1.038]
124	200809_abd_cell1_db3b10.npz	[-13.8576 -13.7082]	[0.36, 0.17]
125	200809_abd_cell1_db3b10.npz	[12.8713 13.2128]	[0.034, 21.772]
126	200809_abd_cell1_db3b10.npz	[-13.5395 -13.1542 -12.7979 -12.0773 -10.6571 -10.254 ]	[0.286, 0.57, 0.824, 0.12, 4.212, 12.196]
127	200809_abd_cell1_db3b10.npz	[-12.5509 -4.5584]	[0.873, 0.381]
128	200809_abd_cell1_db3b10.npz	[-13.585 -13.0208]	[0.28, 0.121]
129	200809_abd_cell1_db3b10.npz	[-13.0511 -12.862 ]	[2.388, 1.977]
130	200809_abd_cell1_db3b10.npz	[-12.0949 -11.9111]	[0.374, 1.5]
131	200809_abd_cell1_db3b10.npz	[13.8734 13.7427]	[0.037, 1.038]
132	200809_abd_cell1_db3b10.npz	[8.5355 8.5454]	[0.357, 1.284]
133	200809_abd_cell1_db3b10.npz	[-14.2351 -14.0682]	[0.034, 0.739]
134	200809_abd_cell1_db3b10.npz	[14.6915 14.1376 0.9178]	[0.036, 6.413, 0.036]
135	200809_abd_cell1_db3b10.npz	[-12.6406 -12.3195 -12.0512]	[0.263, 0.395, 1.638]
136	200809_abd_cell1_db3b10.npz	[-12.9245 -13.0024]	[0.298, 1.838]
137	200809_abd_cell1_db3b10.npz	[14.7279 14.5225 14.4166]	[0.159, 0.731, 0.556]
138	200809_abd_cell1_db3b10.npz	[-12.3421 -10.8169 -10.9402]	[0.329, 0.125, 3.328]
139	200809_abd_cell1_db3b10.npz	[-12.2465 -11.9804]	[0.474, 0.627]
140	200809_abd_cell1_db3b10.npz	[12.4253 11.2761]	[5.29, 0.031]
141	200809_abd_cell1_db3b11.npz	[13.79 13.4433 12.7741 11.7258 3.1987 2.6152]	[0.134, 0.199, 0.243, 1.494, 0.017, 0.083]
142	200809_abd_cell1_db3b11.npz	[-8.6363 -8.1766 -8.1081 -7.8612]	[0.008, 0.293, 0.08, 0.059]
143	200809_abd_cell1_db3b11.npz	[13.9074 13.2491 9.4336 7.7867 5.9384 4.8953 2.6684]	[0.079, 1.08, 0.558, 7.126, 1.493, 0.404, 0.2]
144	200809_abd_cell1_db3b11.npz	[11.0648 7.9962 9.2844]	[3.651, 1.657, 175.55]
145	200807_abd_cell4_db3b5.npz	[-12.4412 -12.4164]	[0.048, 0.167]
146	200808_abd_cell2_db1b3.npz	[-8.5829 -7.3169]	[0.832, 0.469]
147	200808_abd_cell2_db1b3.npz	[10.8144 10.5004]	[0.114, 28.007]
148	200808_abd_cell2_db1b3.npz	[10.1899 9.6268 9.3376 7.7842]	[0.051, 0.291, 2.613, 0.03]
149	200808_abd_cell2_db1b3.npz	[9.0191 8.8512]	[0.098, 0.433]
150	200808_abd_cell2_db1b3.npz	[8.6525 7.9853 7.4395]	[0.068, 0.154, 0.063]
151	200808_abd_cell2_db1b3.npz	[-9.3788 -8.4747]	[0.235, 6.514]
152	200808_abd_cell2_db1b3.npz	[-8.8418 -2.5377]	[0.034, 0.028]
153	200808_abd_cell2_db1b3.npz	[-7.3127 -8.8082]	[0.022, 0.651]
154	200808_abd_cell2_db1b3.npz	[9.6363 9.5265]	[0.303, 3.659]
155	200808_abd_cell2_db1b3.npz	[-9.3208 -8.0183 -6.3579 -5.6359]	[0.312, 3.038, 2.271, 0.241]
156	200808_abd_cell2_db1b3.npz	[-10.8186 -10.1688 -6.0483 -0.0533]	[0.255, 0.096, 116.618, 0.012]
157	200806_abd_cell3_db1b5.npz	[13.862 14.7762 8.813 ]	[0.025, 0.162, 0.224]
158	200808_abd_cell4_db3b6.npz	[-10.2662 -9.7755]	[0.03, 0.103]
159	200808_abd_cell4_db3b6.npz	[-12.8155 -11.0038 -6.8261 -3.6507 -2.4424]	[0.098, 0.023, 0.157, 0.478, 0.069]
160	200807_abd_cell6_db1b10b.npz	[13.4032 12.8293]	[0.057, 0.117]
161	200807_abd_cell6_db1b10b.npz	[14.9451 14.5234]	[0.062, 0.207]
162	200807_abd_cell6_db1b10b.npz	[14.7895 14.4172 14.0538]	[0.147, 0.173, 0.299]
163	200807_abd_cell6_db1b10b.npz	[14.448 14.7225]	[0.034, 0.108]
164	200807_abd_cell6_db1b10b.npz	[-10.3935 -9.9921]	[0.256, 0.203]
165	200807_abd_cell6_db1b10b.npz	[-11.8758 -11.8009]	[0.194, 0.203]
166	200807_abd_cell6_db1b10b.npz	[13.1562 12.7079 12.5215]	[0.1, 0.109, 0.449]
167	200807_abd_cell6_db1b10b.npz	[14.202 13.9008 13.4694 11.5803]	[0.282, 3.52, 8.538, 2.452]
168	200807_abd_cell6_db1b10b.npz	[-11.4245 -11.2649]	[0.904, 0.383]
169	200807_abd_cell6_db1b10b.npz	[13.7397 13.6564]	[0.546, 0.533]
170	200807_abd_cell6_db1b10b.npz	[-12.1235 -11.6468 -3.4646]	[0.091, 1.206, 0.035]
171	200807_abd_cell6_db1b10b.npz	[12.8357 12.6618]	[0.12, 0.339]
172	200807_abd_cell6_db1b10b.npz	[-11.2777 -10.838 -10.688 -9.3639]	[0.056, 0.306, 15.855, 0.09]
173	200807_abd_cell6_db1b10b.npz	[11.5019 11.1859]	[0.068, 1.668]
174	200807_abd_cell6_db1b10b.npz	[-11.259 -10.4606]	[0.224, 0.684]
175	200807_abd_cell6_db1b10b.npz	[-11.1246 -11.0716]	[2.011, 6.123]
176	200807_abd_cell6_db1b10b.npz	[11.8416 11.7536 11.5867]	[0.021, 0.188, 0.071]
177	200807_abd_cell6_db1b10b.npz	[-11.9398 -11.6024 -11.4833]	[0.09, 0.365, 3.945]
178	200807_abd_cell6_db1b10b.npz	[13.2761 12.7633]	[0.127, 0.109]
179	200807_abd_cell6_db1b10b.npz	[-11.2121 -11.2412]	[0.414, 0.737]
180	200807_abd_cell6_db1b10b.npz	[-13.3086 -12.7163 -12.5285]	[0.028, 0.448, 4.818]
181	200807_abd_cell6_db1b10b.npz	[12.5936 12.2706 11.881 11.92 11.9309]	[0.07, 0.194, 0.839, 3.609, 0.207]
182	200807_abd_cell6_db1b10b.npz	[-10.7011 -9.7807]	[0.109, 0.698]
183	200807_abd_cell6_db1b10b.npz	[13.2537 12.6729 12.3747 12.2988]	[0.015, 0.064, 0.714, 0.024]
184	200807_abd_cell6_db1b10b.npz	[13.4011 12.8899]	[0.166, 0.157]
185	200807_abd_cell6_db1b10b.npz	[-11.2009 -11.1944 -10.9933 -10.9919]	[0.035, 0.453, 1.821, 2.631]
186	200807_abd_cell6_db1b10b.npz	[-10.792 -10.3436]	[0.132, 1.16]
187	200807_abd_cell6_db1b10b.npz	[13.5576 12.9923 12.8427]	[0.071, 0.749, 0.391]
188	200807_abd_cell6_db1b10b.npz	[-11.788 -11.2309]	[0.74, 1.729]
189	200807_abd_cell6_db1b10b.npz	[-12.6573 -12.1303]	[0.161, 1.491]
190	200807_abd_cell6_db1b10b.npz	[-11.8787 -11.8779 -11.4911]	[0.275, 0.391, 0.572]
191	200807_abd_cell6_db1b10b.npz	[11.873 11.6616 11.4077]	[0.046, 0.233, 2.683]
192	200806_abd_cell2_db2b11.npz	[14.21 13.4659]	[0.006, 2.413]
193	200802_abd_cell3_db2b3b.npz	[-4.4633 -3.5131]	[0.037, 0.032]
194	200721_acatabd_cell1_db1b2.npz	[-5.9411 -3.7913]	[3.377, 0.693]
195	200721_acatabd_cell1_db1b2.npz	[-12.4207 -9.9601 -8.6172]	[0.021, 15.154, 2.914]
196	200801_abd_new_gfpslips_cell2_db3b10.npz	[15.0744 14.6275 14.2991]	[0.718, 0.536, 1.045]
197	200721_acatabd_cell4_db5b9.npz	[15.1416 13.8049 12.4137]	[0.431, 0.061, 2.391]
198	200721_acatabd_cell4_db5b9.npz	[-11.6207 -9.2085]	[0.034, 38.017]
199	200721_acatabd_cell4_db5b9.npz	[13.6837 12.6754]	[2.656, 5.373]
200	200721_acatabd_cell4_db5b9.npz	[13.5551 13.1776]	[2.342, 0.905]
201	200802_abd_cell3_db1b1.npz	[-7.6203 -6.1618 -5.2821 -2.7441]	[1.486, 0.041, 0.037, 0.009]
202	200807_abd_cell6_db1b9.npz	[14.9437 15.2185]	[0.028, 0.443]
203	200807_abd_cell6_db1b9.npz	[-13.6788 -13.3615]	[0.373, 2.995]
204	200807_abd_cell6_db1b9.npz	[13.3596 13.9988 13.8626]	[0.038, 0.129, 0.691]
205	200807_abd_cell6_db1b9.npz	[-13.8534 -13.636 ]	[5.22, 2.171]
206	200829_abd_cell2_d3_db11.npz	[12.4724 12.2893 11.1836]	[0.092, 0.137, 3.38]
207	200829_abd_cell2_d3_db11.npz	[12.2411 12.1573]	[0.036, 1.012]
208	200829_abd_cell2_d3_db11.npz	[15.8991 16.1119]	[1.332, 0.82]
209	200807_abd_cell2_db2b3.npz	[11.9392 11.28 ]	[0.066, 7.776]
210	200806_abd_cell3_db3b10.npz	[12.1647 11.5786 11.3846]	[0.006, 0.11, 0.157]
211	200806_abd_cell3_db3b10.npz	[-8.1657 -7.8935]	[0.155, 3.876]
212	200807_abd_cell1_db2b8b.npz	[-8.8799 -8.6688]	[0.37, 1.182]
213	200807_abd_cell1_db2b8b.npz	[-5.5073 -5.0786]	[0.205, 2.911]
214	200807_abd_cell1_db2b8b.npz	[11.1557 7.0899]	[4.372, 0.331]
215	200807_abd_cell1_db2b8b.npz	[-8.3977 -3.6083 -1.7936]	[0.051, 0.46, 0.02]
216	200807_abd_cell1_db2b8b.npz	[-8.8633 -8.5315]	[0.928, 1.647]
217	200807_abd_cell1_db2b8b.npz	[-8.2957 -8.3065 -7.914 ]	[0.318, 1.635, 0.337]
218	200807_abd_cell1_db2b8b.npz	[5.753 2.4083]	[0.051, 0.009]
219	200807_abd_cell1_db2b8b.npz	[11.7606 11.7686]	[3.233, 0.665]
220	200807_abd_cell1_db2b8b.npz	[-8.1353 -8.0155]	[0.585, 2.538]
221	200807_abd_cell1_db2b8b.npz	[-8.9618 -6.4382]	[6.035, 0.194]
222	200807_abd_cell1_db2b8b.npz	[-9.5512 -9.4207]	[0.93, 2.536]
223	200807_abd_cell1_db2b8b.npz	[9.9298 9.2945]	[0.066, 0.7]
224	200807_abd_cell1_db2b8b.npz	[-10.4769 -10.1693]	[0.262, 0.591]
225	200807_abd_cell1_db2b8b.npz	[-6.1115 -5.8894]	[0.019, 2.093]
226	200807_abd_cell1_db2b8b.npz	[-10.0178 -9.7042 -9.2816]	[0.056, 3.1, 0.762]
227	200807_abd_cell1_db2b8b.npz	[11.4699 11.1719]	[0.525, 0.58]
228	200807_abd_cell1_db2b8b.npz	[10.0142 9.3933]	[0.14, 0.138]
229	200807_abd_cell1_db2b8b.npz	[-10.1572 -1.5763]	[0.189, 0.018]
230	200807_abd_cell1_db2b8b.npz	[9.748 6.3447]	[5.091, 2.077]
231	200807_abd_cell1_db2b8b.npz	[-8.1534 -2.2829]	[5.207, 0.166]
232	200807_abd_cell1_db2b8b.npz	[-9.0486 -8.8672]	[0.216, 0.377]
233	200807_abd_cell1_db2b8b.npz	[-7.774 -6.9936 -0.5265]	[0.211, 4.704, 0.015]
234	200807_abd_cell1_db2b8b.npz	[-9.0106 -4.4313]	[0.691, 0.325]
235	200807_abd_cell1_db2b8b.npz	[10.023 9.3139]	[0.474, 0.526]
236	200807_abd_cell1_db2b8b.npz	[10.4423 10.2644]	[0.023, 0.495]
237	200807_abd_cell1_db2b8b.npz	[7.8798 7.6148]	[0.03, 3.748]
238	200806_abd_cell3_db1b2.npz	[15.1766 14.7027]	[0.006, 0.453]
239	200807_abd_cell6_db1b10.npz	[13.6709 14.0736 13.5546]	[0.035, 3.647, 3.056]
240	200807_abd_cell6_db1b10.npz	[-12.5787 -12.0907 -11.621 -0.3539]	[0.018, 0.914, 0.554, 0.013]
241	200807_abd_cell6_db1b10.npz	[14.6013 14.0391]	[0.187, 0.883]
242	200807_abd_cell6_db1b10.npz	[14.1518 13.7357 13.2198]	[0.051, 0.031, 0.059]
243	200807_abd_cell6_db1b10.npz	[14.0759 13.2488]	[0.043, 2.284]
244	200807_abd_cell6_db1b10.npz	[-11.7414 -11.3554]	[0.039, 1.151]
245	200807_abd_cell6_db1b10.npz	[14.6195 13.763 ]	[0.019, 0.627]
246	200807_abd_cell6_db1b10.npz	[-12.3061 -11.9488]	[0.066, 0.548]
247	200807_abd_cell6_db1b10.npz	[14.3006 13.3606 5.8517]	[0.026, 2.114, 1.521]
248	200807_abd_cell6_db1b10.npz	[14.6005 14.1864 13.9889 1.8866]	[0.099, 0.082, 0.486, 0.015]
249	200807_abd_cell6_db1b10.npz	[-12.3142 -11.8561]	[0.104, 0.469]
250	200807_abd_cell6_db1b10.npz	[-12.5964 -12.3985]	[0.069, 0.259]
251	200807_abd_cell6_db1b10.npz	[13.3266 12.5659 12.0376 11.6888]	[0.049, 0.068, 0.546, 0.466]
252	200807_abd_cell6_db1b10.npz	[-10.3513 -10.1448]	[0.044, 0.04]
253	200807_abd_cell6_db1b10.npz	[14.3976 13.7599 13.5867]	[0.03, 0.079, 1.322]
254	200807_abd_cell6_db1b10.npz	[-12.9176 -11.9036 -2.7021]	[0.014, 0.096, 0.009]
255	200807_abd_cell6_db1b10.npz	[14.3535 13.6993]	[0.064, 0.834]
256	200807_abd_cell6_db1b10.npz	[14.7759 14.5634]	[0.057, 0.111]
257	200807_abd_cell6_db1b10.npz	[-12.5994 -11.9828 -11.2463]	[0.055, 0.072, 0.34]
258	200807_abd_cell6_db1b10.npz	[13.8113 13.43 ]	[3.055, 0.503]
259	200807_abd_cell6_db1b10.npz	[14.1865 13.8749]	[0.078, 1.58]
260	200807_abd_cell6_db1b10.npz	[15.3698 14.8923]	[0.058, 1.624]
261	200807_abd_cell6_db1b10.npz	[-12.5568 -12.1464 -12.1669]	[0.026, 1.213, 1.474]
262	200807_abd_cell6_db1b10.npz	[13.7279 13.4531]	[0.218, 0.198]
263	200807_abd_cell6_db1b10.npz	[14.6499 14.0635]	[1.122, 0.279]
264	200807_abd_cell6_db1b10.npz	[15.0962 14.6243]	[0.084, 0.665]
265	200807_abd_cell6_db1b10.npz	[14.8458 14.7167]	[1.289, 1.588]
266	200807_abd_cell6_db1b10.npz	[-11.8023 -10.4602]	[0.762, 0.442]
267	200807_abd_cell6_db1b10.npz	[-9.6603 -9.2139]	[0.949, 1.246]
268	200807_abd_cell6_db1b10.npz	[14.4582 13.7136]	[0.151, 3.548]
269	200807_abd_cell6_db1b10.npz	[13.5022 13.2898]	[0.05, 0.104]
270	200807_abd_cell6_db1b10.npz	[14.1219 14.0272]	[0.021, 0.253]
271	200807_abd_cell6_db1b10.npz	[13.9437 13.3223]	[0.08, 0.031]
272	200807_abd_cell6_db1b10.npz	[14.145 13.673]	[0.029, 1.389]
273	200807_abd_cell6_db1b10.npz	[12.9063 13.2853]	[0.031, 2.795]
274	200807_abd_cell6_db1b10.npz	[-11.925 -11.7715]	[0.065, 0.994]
275	200807_abd_cell6_db1b10.npz	[14.0196 13.814 ]	[0.451, 0.61]
276	200807_abd_cell6_db1b10.npz	[13.6593 12.9049]	[0.056, 0.032]
277	200807_abd_cell6_db1b10.npz	[12.719 12.2049 12.2523]	[0.049, 0.94, 0.154]
278	200807_abd_cell6_db1b10.npz	[13.901 12.914]	[0.356, 5.935]
279	200806_abd_cell3_db3b13.npz	[11.3368 14.7152]	[0.008, 0.12]
280	200806_abd_cell3_db3b13.npz	[-12.2359 -12.2657]	[0.033, 0.756]
281	200806_abd_cell3_db3b13.npz	[-12.8667 -12.2482]	[0.006, 0.213]
282	200806_abd_cell3_db3b13.npz	[12.5205 10.736 ]	[0.068, 0.012]
283	200806_abd_cell3_db3b13.npz	[-12.1125 -12.2318]	[0.127, 1.17]
284	200806_abd_cell3_db3b13.npz	[16.0812 16.1106]	[0.007, 0.085]
285	200806_abd_cell3_db3b13.npz	[15.0663 14.8247]	[0.005, 0.134]
286	200806_abd_cell3_db3b13.npz	[12.0549 10.7813]	[0.007, 0.056]
287	200806_abd_cell3_db3b13.npz	[-11.7009 -11.3834]	[1.606, 0.105]
288	200806_abd_cell3_db3b13.npz	[-13.5646 -13.1861]	[0.134, 0.764]
289	200806_abd_cell3_db3b13.npz	[-13.6774 -13.1803]	[0.005, 2.417]
290	200806_abd_cell3_db3b13.npz	[14.4191 14.8205]	[0.008, 0.01]
291	200806_abd_cell3_db3b13.npz	[10.2544 12.6453]	[0.01, 0.106]
292	200806_abd_cell3_db3b13.npz	[-11.7289 -11.5316]	[0.697, 3.079]
293	200806_abd_cell3_db3b13.npz	[-8.4809 -8.0597]	[0.005, 0.302]
294	200806_abd_cell3_db3b13.npz	[14.3072 14.0999]	[0.006, 0.021]
295	200806_abd_cell3_db3b13.npz	[-12.7302 -7.7246]	[1.477, 1.191]
296	200806_abd_cell3_db3b13.npz	[-12.9293 -12.8418 -12.5237]	[0.36, 0.122, 0.766]
297	200806_abd_cell3_db3b13.npz	[-13.3734 -12.8177]	[0.657, 2.051]
298	200806_abd_cell3_db3b13.npz	[9.3319 9.0707]	[0.08, 0.326]
299	200806_abd_cell3_db3b13.npz	[16.3334 15.6232]	[0.004, 0.008]
300	200806_abd_cell3_db3b13.npz	[14.899 14.1709 13.7417]	[0.033, 1.103, 0.703]
301	200806_abd_cell3_db3b13.npz	[-13.2288 -12.978 ]	[1.727, 0.474]
302	200809_abd_cell3_db2b6.npz	[-8.9515 -8.5388 -7.7363]	[0.069, 13.369, 6.44]
303	200809_abd_cell3_db2b6.npz	[-10.2341 -10.1856 -9.8825 -9.7813]	[0.131, 0.479, 1.045, 0.426]
304	200809_abd_cell3_db2b6.npz	[10.6576 9.8819 9.8725]	[0.169, 1.651, 141.684]
305	200809_abd_cell3_db2b6.npz	[10.5929 10.4135 8.1392]	[0.747, 7.986, 7.949]
306	200807_abd_cell2_db6b13.npz	[11.8913 10.0034 8.6535 7.6016 6.2475 5.2233 3.8449 2.7222 1.6437 1.2297]	[1.233, 0.511, 1.556, 2.693, 0.405, 0.93, 1.126, 0.049, 0.089, 0.105]
307	200807_abd_cell2_db6b13.npz	[13.0396 10.9316 10.377 8.3966 6.7197 5.5816 4.6799 3.2238 2.4668]	[2.623, 6.567, 1.524, 0.503, 3.081, 0.464, 2.177, 0.403, 0.112]
308	200807_abd_cell6_db1b10b.npz	[-12.6795 -12.3662]	[0.266, 0.287]
309	200807_abd_cell6_db1b10b.npz	[12.7169 12.1309]	[0.051, 0.813]
310	200807_abd_cell6_db1b10b.npz	[12.1735 11.5474]	[0.154, 0.424]
311	200807_abd_cell6_db1b10b.npz	[-11.384 -11.1794]	[0.128, 0.543]
312	200807_abd_cell6_db1b10b.npz	[13.727 13.4798]	[0.034, 0.035]
313	200807_abd_cell6_db1b10b.npz	[-11.8477 -11.7979]	[0.037, 0.077]
314	200807_abd_cell6_db1b10b.npz	[14.7075 14.2516 13.9441]	[0.032, 0.088, 0.114]
315	200807_abd_cell6_db1b10b.npz	[12.8433 12.4895]	[3.327, 0.37]
316	200807_abd_cell6_db1b10b.npz	[-6.0441 -5.1692]	[0.069, 0.014]
317	200807_abd_cell6_db1b10b.npz	[-11.3288 -11.1501]	[0.111, 0.753]
318	200807_abd_cell6_db1b10b.npz	[-11.2847 -0.9699]	[2.719, 0.012]
319	200807_abd_cell6_db1b10b.npz	[12.3823 11.5913 11.2018]	[0.142, 1.931, 0.114]
320	200807_abd_cell6_db1b10b.npz	[14.0556 13.7742]	[2.307, 0.231]
321	200807_abd_cell6_db1b10b.npz	[14.6595 14.2596]	[0.069, 0.603]
322	200807_abd_cell6_db1b10b.npz	[-12.2176 -11.7979]	[0.03, 0.026]
323	200807_abd_cell6_db1b10b.npz	[-11.7331 -11.2324]	[0.019, 1.004]
324	200807_abd_cell6_db1b10b.npz	[13.5715 13.1283]	[0.041, 0.297]
325	200807_abd_cell6_db1b10b.npz	[-11.4771 -11.0756]	[0.018, 0.269]
326	200807_abd_cell6_db1b10b.npz	[14.9579 14.506 ]	[0.033, 0.72]
327	200807_abd_cell6_db1b10b.npz	[-11.4787 -11.2697 -10.9336]	[0.091, 0.483, 0.112]
328	200807_abd_cell6_db1b10b.npz	[11.4669 10.9011 10.5804]	[0.014, 1.098, 0.851]
329	200807_abd_cell6_db1b10b.npz	[-11.8118 -11.3308]	[0.019, 0.193]
330	200807_abd_cell6_db1b10b.npz	[12.437 11.9148]	[0.128, 0.11]
331	200807_abd_cell6_db1b10b.npz	[-11.3463 -11.289 -11.0241]	[0.126, 1.126, 0.022]
332	200807_abd_cell6_db1b10b.npz	[-12.215 -11.9862 -11.6809 -0.7889]	[0.042, 0.108, 0.473, 0.011]
333	200807_abd_cell6_db1b10b.npz	[13.6366 13.2318 12.7785]	[0.059, 0.285, 0.015]
334	200807_abd_cell6_db1b10b.npz	[-11.5131 -11.2584]	[0.072, 0.286]
335	200807_abd_cell6_db1b10b.npz	[14.0426 13.2294]	[0.049, 0.324]
336	200807_abd_cell6_db1b10b.npz	[12.6406 12.2276 12.0027]	[0.04, 0.041, 0.971]
337	200807_abd_cell6_db1b10b.npz	[14.4699 14.1687]	[0.038, 0.242]
338	200807_abd_cell6_db1b10b.npz	[15.5337 15.2252]	[0.126, 0.097]
339	200807_abd_cell6_db1b10b.npz	[-10.81 -10.7212 -10.2712]	[0.043, 0.272, 0.154]
340	200807_abd_cell6_db1b10b.npz	[-11.1755 -6.5893]	[0.063, 0.006]
341	200807_abd_cell6_db1b10b.npz	[12.4452 12.0682]	[0.29, 0.693]
342	200807_abd_cell6_db1b10b.npz	[-11.1368 -10.7285]	[0.049, 0.125]
343	200807_abd_cell6_db1b10b.npz	[-10.8155 -10.4881]	[0.3, 0.501]
344	200807_abd_cell6_db1b10b.npz	[12.7391 0.7793]	[0.488, 0.025]
345	200807_abd_cell6_db1b10b.npz	[-10.9789 -0.2679]	[0.341, 0.019]
346	200807_abd_cell6_db1b10b.npz	[12.6588 12.5321 12.1451]	[0.065, 0.589, 0.204]
347	200807_abd_cell2_db6b12.npz	[11.765 11.099]	[0.024, 0.113]
348	200806_abd_cell3_db1b1.npz	[-11.6227 -8.9348]	[0.017, 0.134]
349	200806_abd_cell3_db1b1.npz	[11.1417 9.69 ]	[0.02, 0.038]
350	200807_abd_cell1_db3b10.npz	[15.0715 13.9793]	[0.036, 2.476]
351	200806_abd_cell3_db3b12.npz	[15.3215 13.3727]	[0.135, 1.745]
352	200806_abd_cell3_db3b12.npz	[14.7919 12.7363]	[0.868, 2.287]
353	200806_abd_cell3_db3b12.npz	[-13.2748 -9.8366]	[2.393, 1.338]
354	200806_abd_cell3_db3b12.npz	[-14.4002 -12.6229]	[4.116, 15.554]
355	200806_abd_cell3_db3b12.npz	[-13.8755 -12.7216]	[0.407, 0.878]
356	200806_abd_cell3_db3b12.npz	[14.7766 14.6786]	[0.005, 0.03]
357	200806_abd_cell3_db3b12.npz	[-13.402 -12.7562 -12.5672]	[0.048, 1.811, 4.782]
358	200806_abd_cell3_db3b12.npz	[15.5336 14.9645 13.9453]	[0.005, 0.022, 0.097]
359	200806_abd_cell3_db3b12.npz	[-13.6613 -13.2338]	[0.043, 4.288]
360	200806_abd_cell3_db3b12.npz	[-14.5448 -13.8931]	[0.174, 7.263]
361	200806_abd_cell3_db3b12.npz	[15.4566 15.1341 14.6389 12.0593]	[0.06, 0.027, 0.04, 0.685]
362	200806_abd_cell3_db3b12.npz	[15.709 15.6432 15.2235]	[0.023, 0.364, 0.127]
363	200806_abd_cell3_db3b12.npz	[15.5873 14.8911]	[0.01, 0.621]
364	200806_abd_cell3_db3b12.npz	[15.3116 15.4968 14.7889 13.5778 12.2218]	[0.029, 0.133, 0.072, 0.165, 3.154]
365	200806_abd_cell3_db3b12.npz	[14.4163 14.1369 13.6185]	[0.232, 0.044, 0.946]
366	200806_abd_cell3_db3b12.npz	[15.6107 15.9577]	[0.006, 0.082]
367	200806_abd_cell3_db3b12.npz	[-12.8045 -11.8317 -11.5492 -10.2095 -9.6311 -8.0502 -5.8727 -4.4615 -2.6906]	[0.023, 0.12, 0.069, 0.728, 0.473, 0.059, 0.038, 1.34, 0.751]
368	200806_abd_cell3_db3b12.npz	[-11.5417 -11.1508 -10.4837 -9.5694 -8.9245 -8.1973 -7.0062 -5.4331 -3.393 -2.6996]	[0.537, 0.178, 0.039, 0.085, 1.126, 0.477, 27.954, 20.568, 0.238, 2.79]
369	200806_abd_cell3_db3b12.npz	[13.172 12.194 11.7305 10.1206 8.5925 7.3845 5.2349 3.8682 2.5989]	[0.015, 0.63, 0.041, 0.361, 0.537, 0.724, 10.383, 0.013, 0.134]
370	200806_abd_cell3_db3b12.npz	[-13.2525 -12.0717 -10.9052 -10.3172 -8.6896 -7.7907 -6.6117 -5.3216]	[0.472, 0.91, 0.16, 0.358, 0.078, 0.606, 0.848, 8.948]
371	200806_abd_cell3_db3b12.npz	[11.8824 8.3815 4.3675]	[0.012, 0.035, 0.378]
372	200806_abd_cell3_db3b12.npz	[-11.6062 -8.681 -6.5188]	[0.015, 1.855, 6.083]
373	200807_abd_cell1_db2b7b.npz	[14.3035 8.4367]	[0.207, 0.104]
374	200807_abd_cell1_db2b7b.npz	[-9.8951 -9.421 ]	[0.216, 1.052]
375	200807_abd_cell1_db2b7b.npz	[-11.261 -7.1769]	[0.258, 0.103]
376	200807_abd_cell1_db2b7b.npz	[-11.5121 -4.5252]	[1.154, 3.33]
377	200807_abd_cell1_db2b7b.npz	[-11.1674 -11.0202]	[0.273, 3.421]
378	200807_abd_cell1_db2b7b.npz	[13.3755 12.9739 12.4387 11.6217]	[0.06, 0.092, 0.272, 0.139]
379	200807_abd_cell1_db2b7b.npz	[-10.5739 -10.3953]	[2.476, 7.417]
380	200807_abd_cell1_db2b7b.npz	[11.2035 10.6593]	[0.008, 5.234]
381	200807_abd_cell1_db2b7b.npz	[-5.4282 -5.2827]	[0.68, 3.882]
382	200807_abd_cell1_db2b7b.npz	[14.345 13.9843 13.8143]	[0.032, 0.051, 0.552]
383	200807_abd_cell1_db2b7b.npz	[-9.5968 -9.3413]	[2.797, 0.907]
384	200807_abd_cell1_db2b7b.npz	[12.8283 12.6482 12.2153 4.4536]	[0.06, 0.079, 1.773, 0.033]
385	200807_abd_cell1_db2b7b.npz	[12.5635 4.6252]	[0.778, 0.014]
386	200807_abd_cell1_db2b7b.npz	[12.9384 12.7566 12.4202]	[0.062, 0.077, 0.06]
387	200807_abd_cell1_db2b7b.npz	[-10.5225 -0.8769]	[0.833, 0.067]
388	200807_abd_cell1_db2b7b.npz	[-10.4552 -9.5816]	[9.586, 5.65]
389	200807_abd_cell1_db2b7b.npz	[-10.0226 -9.3814]	[0.037, 7.237]
390	200807_abd_cell1_db2b7b.npz	[-4.6594 -3.8802 -2.6425]	[1.009, 0.09, 0.148]
391	200807_abd_cell1_db2b7b.npz	[-9.149 -8.6684]	[0.05, 6.95]
392	200807_abd_cell1_db2b7b.npz	[10.6157 10.4775]	[9.164, 0.186]
393	200807_abd_cell1_db2b7b.npz	[-8.4497 -2.7094]	[0.477, 0.017]
394	200807_abd_cell1_db2b7b.npz	[14.125 13.7639]	[8.666, 1.613]
395	200807_abd_cell1_db2b7b.npz	[11.1431 10.9518 10.765 ]	[0.092, 22.717, 14.21]
396	200807_abd_cell1_db2b7b.npz	[15.7483 15.5155]	[0.072, 0.109]
397	200801_abd_new_gfpslips_db1b2.npz	[14.9499 14.0952]	[0.004, 0.077]
398	200808_abd_cell3_db2b15.npz	[-10.8281 -5.7758]	[1.444, 0.015]
399	200808_abd_cell3_db2b15.npz	[-10.9639 -8.4015 -5.1308]	[0.021, 0.101, 0.018]
400	200808_abd_cell3_db2b15.npz	[-11.5973 -9.7915 -4.5441 -0.3291]	[0.007, 0.017, 0.037, 0.011]
401	200721_acatabd_cell1_db2b7b.npz	[-14.3848 -13.7512 -11.75 -9.3282]	[0.348, 0.41, 1.583, 3.537]
402	200721_acatabd_cell1_db2b7b.npz	[-14.6605 -13.9661 -11.996 -10.6131 -9.2098]	[0.031, 0.292, 5.907, 34.373, 50.846]
403	200721_acatabd_cell1_db2b7b.npz	[-14.7374 -13.6382]	[0.415, 24.829]
404	200806_abd_cell3_flippeddb3b22.npz	[13.7981 12.948 9.1421 7.3727 2.6815]	[0.007, 0.058, 0.029, 0.039, 0.127]
405	200806_abd_cell3_flippeddb3b22.npz	[-11.0927 -9.6614]	[0.06, 0.031]
406	200806_abd_cell3_flippeddb3b22.npz	[-10.2135 -8.5945 -6.2003 -5.2317 -2.8278]	[1.589, 0.079, 0.479, 0.029, 0.031]
407	200806_abd_cell3_flippeddb3b22.npz	[-9.5539 -6.9621 -4.8086]	[0.036, 0.385, 0.071]
408	200806_abd_cell3_flippeddb3b22.npz	[15.3828 13.3985 10.3029 4.5912]	[0.013, 0.041, 0.053, 0.109]
409	200806_abd_cell3_flippeddb3b22.npz	[-10.2702 -9.2192]	[0.248, 0.981]
410	200806_abd_cell3_flippeddb3b22.npz	[-6.7607 -5.2993]	[0.01, 0.068]
411	200806_abd_cell3_flippeddb3b22.npz	[14.8119 12.6486 8.9197 7.0896 4.69 ]	[0.006, 0.089, 0.285, 0.463, 0.079]
412	200806_abd_cell3_flippeddb3b22.npz	[-11.2365 -10.6964 -10.184 ]	[0.044, 0.154, 0.193]
413	200806_abd_cell3_flippeddb3b22.npz	[10.3275 10.2061 7.4757]	[0.44, 0.23, 3.035]
414	200806_abd_cell3_flippeddb3b22.npz	[16.5537 14.0109]	[0.057, 0.08]
415	200806_abd_cell3_flippeddb3b22.npz	[16.5546 13.1682 10.4184 8.1093]	[2.261, 0.443, 11.906, 0.645]
416	200806_abd_cell3_flippeddb3b22.npz	[13.769 12.6788 11.1338 9.8766]	[0.323, 0.54, 0.81, 1.173]
417	200806_abd_cell3_flippeddb3b22.npz	[9.2602 8.4721 6.0555 3.7003]	[18.535, 2.234, 2.312, 42.799]
418	200807_abd_cell6_db1b2.npz	[11.181 9.4779 8.5219]	[0.151, 0.022, 2.745]
419	200807_abd_cell6_db1b2.npz	[-13.7233 -13.0507 -12.1216 -10.7266 -9.2209]	[0.528, 0.76, 0.133, 1.228, 0.5]
420	200807_abd_cell6_db1b2.npz	[13.0795 12.1932 10.6954 10.3818]	[2.512, 8.316, 3.683, 3.076]
421	200807_abd_cell6_db1b2.npz	[13.0868 4.5487]	[0.242, 0.013]
422	200807_abd_cell6_db1b2.npz	[-12.4203 -12.2788 -12.0167]	[0.049, 0.256, 0.067]
423	200807_abd_cell6_db1b2.npz	[-13.3314 -12.8157]	[0.03, 0.784]
424	200807_abd_cell6_db1b2.npz	[-14.0771 -8.2114]	[1.665, 0.105]
425	200807_abd_cell6_db1b2.npz	[15.3418 12.7547 12.2099 11.7563]	[0.129, 0.078, 0.285, 5.179]
426	200807_abd_cell6_db1b2.npz	[-13.8125 -13.0566 -5.1606]	[0.027, 1.405, 0.269]
427	200807_abd_cell6_db1b2.npz	[14.8426 13.5313]	[0.833, 0.627]
428	200807_abd_cell6_db1b2.npz	[-14.4142 -13.8444]	[0.106, 3.021]
429	200807_abd_cell6_db1b2.npz	[14.3713 13.8388 12.7088 12.8202]	[0.018, 0.098, 5.167, 0.446]
430	200807_abd_cell6_db1b2.npz	[13.8546 13.3903]	[0.026, 1.294]
431	200807_abd_cell6_db1b2.npz	[-13.8226 -12.0117 -11.1183]	[0.027, 5.422, 1.2]
432	200807_abd_cell6_db1b2.npz	[10.7308 10.2874]	[0.234, 3.904]
433	200807_abd_cell6_db1b2.npz	[-11.3867 -11.2615]	[0.483, 2.71]
434	200807_abd_cell6_db1b2.npz	[-14.0096 -13.5928]	[0.009, 5.44]
435	200807_abd_cell6_db1b2.npz	[14.5204 14.3421]	[0.621, 2.05]
436	200807_abd_cell6_db1b2.npz	[-14.8309 -14.2417]	[0.017, 0.166]
437	200807_abd_cell6_db1b2.npz	[-13.4842 -12.9898 -12.6842]	[0.361, 0.339, 1.021]
438	200807_abd_cell6_db1b2.npz	[14.5911 13.6412]	[2.216, 0.513]
439	200807_abd_cell6_db1b2.npz	[14.88 14.4345 13.8675 13.2066]	[0.369, 0.287, 0.105, 1.316]
440	200807_abd_cell6_db1b2.npz	[14.2356 14.1279 13.7222]	[0.038, 0.057, 12.532]
441	200807_abd_cell6_db1b2.npz	[14.9654 14.7107]	[0.275, 8.202]
442	200807_abd_cell6_db1b2.npz	[-12.7678 -2.1069]	[4.081, 0.009]
443	200807_abd_cell6_db1b2.npz	[13.0501 12.5608 11.6131 8.3643]	[0.061, 0.583, 3.449, 0.112]
444	200807_abd_cell6_db1b2.npz	[13.8313 13.5292 3.1738]	[0.264, 1.967, 0.097]
445	200807_abd_cell4_db4b11.npz	[13.0122 11.727 ]	[7.61, 3.676]
446	200807_abd_cell4_db4b11.npz	[-13.5218 -13.1837]	[0.053, 0.369]
447	200807_abd_cell4_db4b11.npz	[-12.8149 -12.676 -9.8773]	[0.215, 0.466, 5.216]
448	200807_abd_cell4_db4b11.npz	[12.1477 11.1708 10.1673 9.4494 8.3426 8.123 7.4516 7.2842 6.8583 6.5065 4.7086 4.0065 2.4186]	[0.017, 1.966, 8.789, 2.377, 1.081, 6.086, 0.246, 4.746, 5.486, 0.193, 0.047, 0.165, 4.211]
449	200807_abd_cell4_db4b11.npz	[-14.9186 -13.5444 -13.0282 -10.0215 -8.5007 -7.983 -7.6661 -6.9742 -6.0622]	[0.063, 0.288, 1.492, 9.078, 2.662, 4.13, 2.662, 6.518, 4.476]
450	200809_abd_cell1_db1b3.npz	[17.3594 16.8354]	[0.958, 0.229]
451	200809_abd_cell1_db1b3.npz	[16.8517 16.4798]	[1.309, 0.606]
452	200809_abd_cell1_db1b3.npz	[16.5691 16.0648 3.1311]	[0.051, 1.052, 0.023]
453	200809_abd_cell1_db1b3.npz	[-15.087 -16.2511 -16.1122]	[0.022, 0.307, 0.151]
454	200809_abd_cell1_db1b3.npz	[15.8237 15.1409]	[0.12, 0.353]
455	200809_abd_cell1_db1b3.npz	[14.7096 14.106 13.7019 7.6598]	[0.061, 0.319, 2.979, 0.918]
456	200807_abd_cell4_db4b10.npz	[-15.0878 -14.212 ]	[0.03, 2.355]
457	200807_abd_cell4_db4b10.npz	[15.8619 16.4968]	[0.023, 0.058]
458	200807_abd_cell4_db4b10.npz	[-13.0336 -12.4882 -10.4737 -7.9215 -5.8537 -1.2423]	[0.021, 1.368, 2.744, 0.373, 3.522, 0.013]
459	200807_abd_cell5_db3b9.npz	[6.7513 6.6469]	[0.283, 0.052]
460	200807_abd_cell5_db3b9.npz	[-8.5924 -8.4459]	[0.516, 1.383]
461	200807_abd_cell5_db3b9.npz	[-12.9764 -12.3707]	[0.037, 0.433]
462	200807_abd_cell5_db3b9.npz	[-13.5417 -13.2368 -11.9062]	[0.584, 5.314, 6.147]
463	200809_abd_cell2_db7b14.npz	[12.8557 12.1644]	[0.017, 0.005]
464	200720_acatABDnolink_cell2_db1b2.npz	[15.6228 15.338 ]	[0.022, 0.023]
465	200720_acatABDnolink_cell2_db1b2.npz	[13.616 14.5416 13.6482 12.593 9.005 8.621 ]	[0.097, 0.088, 0.088, 0.74, 1.41, 0.898]
466	200720_acatABDnolink_cell2_db1b2.npz	[7.6104 6.3585]	[0.04, 1.702]
467	200720_acatABDnolink_cell3_db2b3.npz	[15.3382 14.1675]	[0.247, 2.061]
468	200806_abd_cell3_flippeddb3b22b.npz	[16.5123 14.7574]	[0.048, 0.186]
469	200806_abd_cell3_flippeddb3b22b.npz	[16.513 15.098]	[0.046, 2.046]
470	200806_abd_cell3_flippeddb3b22b.npz	[-11.7165 -11.1377]	[0.006, 0.084]
471	200806_abd_cell3_flippeddb3b22b.npz	[15.7452 11.8187 7.8521]	[0.559, 0.142, 0.061]
472	200806_abd_cell3_flippeddb3b22b.npz	[15.9593 12.5642]	[0.565, 0.005]
473	200806_abd_cell3_flippeddb3b22b.npz	[18.6073 17.8995]	[0.036, 0.321]
474	200806_abd_cell3_flippeddb3b22b.npz	[13.4665 11.0281]	[0.99, 2.463]
475	200806_abd_cell3_flippeddb3b22b.npz	[11.6002 10.4072]	[0.242, 0.034]
476	200806_abd_cell3_flippeddb3b22b.npz	[-9.5675 -7.9306 -6.6756 -4.2144 -2.5288]	[0.116, 0.185, 0.025, 0.02, 0.034]
477	200806_abd_cell3_flippeddb3b22b.npz	[16.4418 11.1841]	[0.565, 1.355]
478	200806_abd_cell3_flippeddb3b22b.npz	[ 8.2491 5.7308 10.5874 13.5178]	[0.321, 26.94, 203.421, 28.758]
479	200807_abd_cell1_db2b7.npz	[-10.8951 -10.226 ]	[0.825, 0.407]
480	200807_abd_cell1_db2b7.npz	[11.9904 11.9839]	[0.007, 0.247]
481	200807_abd_cell1_db2b7.npz	[-11.5519 -3.9891]	[0.246, 0.192]
482	200807_abd_cell1_db2b7.npz	[14.6698 14.1745]	[0.008, 0.051]
483	200807_abd_cell1_db2b7.npz	[-12.844 -12.0457 -8.8525]	[0.143, 0.883, 0.243]
484	200807_abd_cell1_db2b7.npz	[-12.247 -11.8762 -11.774 ]	[0.434, 0.424, 0.455]
485	200807_abd_cell1_db2b7.npz	[14.3929 13.2218 10.5871]	[0.419, 10.863, 0.277]
486	200807_abd_cell1_db2b7.npz	[-12.4902 -11.0323 -9.413 -3.0814]	[0.028, 0.537, 6.048, 0.13]
487	200807_abd_cell1_db2b7.npz	[14.1654 12.8041 11.0475]	[0.059, 3.694, 0.734]
488	200807_abd_cell1_db2b7.npz	[-12.0666 -10.8959]	[1.337, 1.255]
489	200807_abd_cell1_db2b7.npz	[13.0097 11.4567]	[0.069, 1.877]
490	200807_abd_cell1_db2b7.npz	[-14.1174 -13.5858 -13.2106]	[0.034, 0.19, 0.478]
491	200807_abd_cell1_db2b7.npz	[-13.0891 -12.7503]	[1.045, 1.451]
492	200807_abd_cell1_db2b7.npz	[-11.0587 -7.0846]	[1.722, 6.992]
493	200807_abd_cell1_db2b7.npz	[-12.0359 -9.6696 -8.1235]	[7.293, 2.75, 3.864]
494	200808_abd_cell3_db2b16.npz	[-10.3664 -10.0259]	[0.158, 0.326]
495	200831_abd_cell3_db1b7.npz	[12.6396 12.7224 7.2013]	[0.019, 3.335, 2.325]
496	200831_abd_cell3_db1b7.npz	[8.3958 8.4242 8.2298]	[0.011, 0.048, 0.026]
497	200809_abd_cell3_db2b6d.npz	[-9.0916 -8.4392 -8.1143 -5.8973]	[0.036, 0.142, 4.095, 2.608]
498	200809_abd_cell3_db2b6d.npz	[13.0324 12.093 9.5818]	[0.026, 0.104, 6.744]
499	200809_abd_cell3_db2b6d.npz	[-8.4595 -7.9028 -6.5524]	[0.085, 2.937, 3.186]
500	200809_abd_cell3_db2b6d.npz	[15.0289 14.0464]	[0.05, 5.99]
501	200809_abd_cell3_db2b6d.npz	[13.8498 11.5398]	[38.254, 0.352]
502	200807_abd_cell6_db1b10b.npz	[13.3532 12.4334]	[0.032, 1.73]
503	200807_abd_cell6_db1b10b.npz	[-8.7059 -8.0769 -7.8788]	[0.018, 0.605, 9.17]
504	200807_abd_cell6_db1b10b.npz	[13.5723 13.2403]	[2.792, 0.585]
505	200807_abd_cell6_db1b10b.npz	[-11.756 -11.2883]	[0.113, 0.133]
506	200807_abd_cell6_db1b10b.npz	[-11.5952 -11.0172]	[0.047, 0.073]
507	200807_abd_cell6_db1b10b.npz	[12.3139 11.9225]	[0.031, 1.949]
508	200807_abd_cell6_db1b10b.npz	[-11.4177 -10.8389]	[0.054, 0.995]
509	200807_abd_cell6_db1b10b.npz	[13.8454 13.5837]	[0.172, 0.02]
510	200807_abd_cell6_db1b10b.npz	[-13.3987 -6.7037 -1.795 ]	[0.248, 0.016, 0.017]
511	200807_abd_cell6_db1b10b.npz	[-11.916 -11.5118 -11.0612]	[0.035, 0.081, 0.275]
512	200807_abd_cell6_db1b10b.npz	[13.8122 13.4003]	[0.044, 0.02]
513	200807_abd_cell6_db1b10b.npz	[-12.134 -11.624]	[0.055, 0.126]
514	200807_abd_cell6_db1b10b.npz	[5.2726 4.9128]	[0.005, 0.022]
515	200807_abd_cell6_db1b10b.npz	[-11.5533 -11.1307 -10.9948]	[0.036, 3.116, 1.729]
516	200807_abd_cell6_db1b10b.npz	[12.3226 12.4787]	[0.059, 0.597]
517	200807_abd_cell6_db1b10b.npz	[12.6189 12.3146 12.3438]	[0.069, 0.056, 0.688]
518	200807_abd_cell6_db1b10b.npz	[-11.3645 -3.4453]	[0.048, 0.013]
519	200807_abd_cell6_db1b10b.npz	[-11.6101 -0.8647]	[0.086, 0.027]
520	200807_abd_cell6_db1b10b.npz	[-11.9165 -11.8471]	[0.05, 0.649]
521	200807_abd_cell6_db1b10b.npz	[13.1256 12.8212 12.6011]	[0.578, 0.528, 3.469]
522	200807_abd_cell6_db1b10b.npz	[-11.4497 -11.122 ]	[0.176, 0.173]
523	200807_abd_cell6_db1b10b.npz	[13.4392 13.0046]	[0.046, 0.77]
524	200807_abd_cell6_db1b10b.npz	[13.0902 11.6201]	[0.136, 0.027]
525	200807_abd_cell6_db1b10b.npz	[12.5255 11.6589]	[0.092, 0.7]
526	200807_abd_cell6_db1b10b.npz	[-13.0515 -12.3744]	[0.095, 0.03]
527	200807_abd_cell6_db1b10b.npz	[12.4423 11.6754]	[0.04, 0.85]
528	200807_abd_cell6_db1b10b.npz	[12.6884 0.9474]	[0.301, 0.024]
529	200721_acatabd_cell1_db3b9.npz	[-7.9913 -5.8698 -2.7124]	[0.007, 7.851, 0.08]
530	200809_abd_cell2_db7b16.npz	[5.9147 5.6439]	[0.186, 0.206]
531	200809_abd_cell2_db7b16.npz	[7.1431 6.3829]	[0.031, 2.152]
532	200809_abd_cell2_db7b16.npz	[-10.1998 -9.6589]	[0.372, 1.186]
533	200809_abd_cell2_db7b16.npz	[14.2907 14.8526]	[0.021, 2.936]
534	200809_abd_cell2_db7b16.npz	[13.8232 13.3131]	[0.055, 1.455]
535	200809_abd_cell2_db7b16.npz	[14.3995 14.4478]	[0.166, 1.035]
536	200809_abd_cell2_db7b16.npz	[12.6025 10.2767 8.1234]	[0.009, 0.03, 0.046]
537	200809_abd_cell2_db7b16.npz	[-13.7284 -13.3556 -12.9089]	[0.023, 0.228, 0.13]
538	200809_abd_cell2_db7b16.npz	[-13.0495 -12.4797 -12.2595]	[0.038, 0.101, 0.229]
539	200809_abd_cell2_db7b16.npz	[12.5949 11.1285]	[3.573, 151.919]
540	200721_acatabd_cell2_db1b3.npz	[14.0919 13.6908 11.9422 8.4673]	[0.086, 2.98, 3.155, 0.01]
541	200807_abd_cell4_db4b12.npz	[15.8947 15.1517 12.9306 4.77 ]	[0.031, 0.08, 3.122, 0.04]
542	200807_abd_cell4_db4b12.npz	[-15.2584 -13.3565]	[0.016, 1.283]
543	200721_acatabd_cell2_db1b2.npz	[-14.596 -13.694]	[0.567, 3.668]
544	200721_acatabd_cell2_db1b2.npz	[12.4349 11.1814]	[1.635, 1.566]
545	200721_acatabd_cell2_db1b2.npz	[7.6176 7.0782]	[0.04, 4.142]
546	200721_acatabd_cell2_db1b2.npz	[15.3852 14.7703 14.2366]	[0.33, 0.024, 0.19]
547	200721_acatabd_cell2_db1b2.npz	[16.0397 13.9137]	[0.022, 0.015]
548	200721_acatabd_cell2_db1b2.npz	[14.5682 14.1595 13.3861]	[0.411, 0.047, 3.175]
549	200721_acatabd_cell2_db1b2.npz	[13.3312 12.0093]	[0.53, 1.681]
550	200721_acatabd_cell2_db1b2.npz	[14.1644 13.4853]	[0.302, 1.072]
551	200721_acatabd_cell2_db1b2.npz	[-12.1567 -10.5448]	[2.685, 4.896]
552	200808_abd_cell4_db4b11.npz	[-12.4133 -11.8267 -9.4953 -8.2089 -5.327 ]	[0.166, 39.54, 1.185, 5.721, 72.386]
553	200808_abd_cell4_db4b11.npz	[-10.8716 -10.1745 -8.0902 -5.8375 -4.5093 -1.9444]	[0.812, 13.911, 12.378, 9.764, 12.418, 12.302]
554	200720_acatABDnolink_cell3_db3b5b.npz	[-9.133 -6.6539]	[0.086, 0.093]
555	200808_abd_cell3_db2b10b.npz	[-4.8958 -3.598 ]	[0.119, 1.46]
556	200808_abd_cell3_db2b10b.npz	[5.1109 4.2079]	[0.088, 0.244]
557	200808_abd_cell3_db2b10b.npz	[-6.9928 -3.1521]	[0.129, 0.105]
558	200808_abd_cell3_db2b10b.npz	[6.2221 3.8626]	[0.075, 0.025]
559	200808_abd_cell3_db2b10b.npz	[-8.7826 -2.9256]	[0.036, 0.021]
560	200808_abd_cell3_db2b10b.npz	[11.3417 5.5084]	[0.765, 0.013]
561	200808_abd_cell3_db2b10b.npz	[11.6004 5.354 ]	[0.024, 0.038]
562	200808_abd_cell3_db2b10b.npz	[12.471 12.6745 12.4263 12.7665 13.0225]	[0.013, 2.133, 0.274, 77.151, 145.16]
563	200831_abd_cell3_db1b6.npz	[12.7987 12.4164 12.1011]	[0.284, 0.422, 0.586]
564	200806_abd_cell3_db3b21.npz	[-9.284 -8.0048]	[0.289, 1.685]
565	200806_abd_cell3_db3b21.npz	[-10.6594 -9.5345 -8.6625 -5.3279 -4.2019 -0.9439]	[0.181, 1.039, 1.643, 0.112, 5.646, 0.049]
566	200806_abd_cell3_db3b21.npz	[-14.8172 -14.2542 -13.443 -11.4756 -9.187 -7.8835 -6.6275 -6.1309 -3.9522 -3.1792]	[0.099, 0.177, 0.343, 1.079, 1.774, 0.856, 1.474, 0.421, 0.25, 0.166]
567	200806_abd_cell3_db3b21.npz	[16.5758 14.5915 12.615 11.188 8.8991 5.7719 3.7072]	[0.02, 0.126, 0.072, 0.149, 0.484, 0.014, 0.124]
568	200806_abd_cell3_db3b21.npz	[-14.4764 -13.6225]	[0.027, 0.185]
569	200806_abd_cell3_db3b21.npz	[17.2351 15.2301 14.7826 12.3981 10.0616 6.8384]	[0.089, 0.326, 2.526, 0.286, 0.564, 0.029]
570	200806_abd_cell3_db3b21.npz	[17.3086 13.8691 12.6487 11.3172 8.569 7.1494]	[0.042, 0.186, 0.054, 0.092, 0.221, 0.148]
571	200806_abd_cell3_db3b21.npz	[-14.0284 -13.683 -11.3911 -8.8977 -7.7234]	[0.987, 1.339, 0.282, 0.664, 4.429]
572	200806_abd_cell3_db3b21.npz	[-9.2614 -8.0988]	[0.022, 1.001]
573	200806_abd_cell3_db3b21.npz	[-10.3394 -9.8003 -9.2228]	[0.028, 0.131, 1.037]
574	200806_abd_cell3_db3b21.npz	[14.4538 11.6215 9.4719 7.9474 6.8817 1.6787]	[0.02, 0.016, 0.105, 0.782, 0.237, 0.02]
575	200806_abd_cell3_db3b21.npz	[-7.4491 -5.3713 -3.4466]	[0.048, 1.574, 0.378]
576	200806_abd_cell3_db3b21.npz	[1.7212 1.4419]	[0.568, 0.048]
577	200806_abd_cell3_db3b21.npz	[-6.5317 -4.465 ]	[1.177, 0.983]
578	200806_abd_cell3_db3b21.npz	[-12.9873 -11.813 -11.3513 -9.1856]	[0.176, 3.736, 1.154, 3.33]
579	200806_abd_cell3_db3b21.npz	[-8.2784 -4.6326]	[0.242, 0.542]
580	200806_abd_cell3_db3b21.npz	[-14.6411 -12.2121 -11.298 -10.8432 -9.045 -7.2085 -6.3784 -4.3528 -2.3728]	[0.146, 0.037, 0.058, 0.291, 1.793, 0.814, 2.209, 0.191, 0.094]
581	200806_abd_cell3_db3b21.npz	[-6.7162 -6.0669 -3.4637]	[0.559, 0.614, 0.288]
582	200806_abd_cell3_db3b21.npz	[2.2841 1.9426 1.3884]	[0.063, 0.027, 0.094]
583	200806_abd_cell3_db3b21.npz	[5.245 0.9673]	[0.082, 0.027]
584	200808_abd_cell3_db2b9.npz	[13.0154 12.6186 11.5312]	[0.166, 0.279, 3.373]
585	200722_acatABD_cell2_db2b2.npz	[-9.6565 -8.6844 -2.8431]	[0.119, 4.017, 0.738]
586	200721_acatabd_cell1_db2b7.npz	[17.7659 17.9661]	[0.007, 0.012]
587	200721_acatabd_cell1_db2b7.npz	[-14.9847 -14.5421]	[1.348, 1.383]
588	200721_acatabd_cell1_db2b7.npz	[-14.7735 -13.3669]	[0.035, 1.084]
589	200721_acatabd_cell1_db2b7.npz	[-7.9583 -3.4599]	[1.577, 0.012]
590	200721_acatabd_cell1_db2b7.npz	[19.5272 16.5572]	[0.023, 0.006]
591	200721_acatabd_cell1_db2b7.npz	[-13.9005 -13.6327]	[0.034, 0.808]
592	200721_acatabd_cell1_db2b7.npz	[-11.3818 -10.5765]	[0.173, 1.608]
593	200721_acatabd_cell1_db2b7.npz	[-14.4277 -13.8771]	[0.084, 0.636]
594	200721_acatabd_cell1_db2b7.npz	[-15.089 -14.4642]	[0.037, 0.359]
595	200721_acatabd_cell1_db2b7.npz	[-15.447 -4.1183]	[0.021, 0.243]
596	200721_acatabd_cell1_db2b7.npz	[-14.343 -1.0948]	[0.314, 0.011]
597	200721_acatabd_cell1_db2b7.npz	[-13.7129 -9.1579]	[0.259, 0.278]
598	200721_acatabd_cell1_db2b7.npz	[-8.2334 -7.5855 -7.0513]	[0.008, 0.011, 0.157]
599	200721_acatabd_cell1_db2b7.npz	[-5.8834 -1.091 ]	[1.715, 0.005]
600	200721_acatabd_cell1_db2b7.npz	[17.8952 15.166 ]	[0.019, 0.018]
601	200721_acatabd_cell1_db2b7.npz	[-14.5376 -13.9619]	[0.105, 0.515]
602	200721_acatabd_cell1_db2b7.npz	[-14.8807 -13.7035]	[0.034, 0.233]
603	200721_acatabd_cell1_db2b7.npz	[-15.5457 -14.7598]	[0.025, 1.931]
604	200721_acatabd_cell1_db2b7.npz	[-15.327 -14.8308]	[0.066, 0.547]
605	200721_acatabd_cell1_db2b7.npz	[18.0341 16.7711]	[0.004, 0.024]
606	200721_acatabd_cell1_db2b7.npz	[-14.9542 -13.9944]	[0.004, 0.171]
607	200721_acatabd_cell1_db2b7.npz	[-8.3394 -7.736 ]	[0.669, 2.517]
608	200721_acatabd_cell1_db2b7.npz	[-13.7681 -3.7444]	[1.835, 0.064]
609	200721_acatabd_cell1_db2b7.npz	[4.7254 4.0763]	[0.007, 0.005]
610	200806_abd_cell3_db3b19.npz	[12.2013 12.6119 11.2853]	[0.619, 0.032, 2.882]
611	200721_acatabd_cell4_db1b1.npz	[-12.1078 -11.1061 -6.7222 -3.1209]	[1.137, 17.974, 31.738, 0.114]
612	200721_acatabd_cell4_db1b1.npz	[14.1345 12.8628 12.6133 10.9367 8.6596 3.2351]	[2.686, 0.103, 16.403, 0.117, 0.719, 0.121]
613	200721_acatabd_cell4_db1b1.npz	[-12.8342 -11.7427]	[0.248, 7.867]
614	200721_acatabd_cell4_db1b1.npz	[-12.496 -10.0072 -6.4074 -2.287 -1.7221]	[5.723, 0.209, 34.727, 0.256, 0.325]
615	200721_acatabd_cell4_db1b1.npz	[12.2986 9.9393 8.2689 6.7149 5.7267 5.3906]	[3.059, 0.053, 0.365, 0.175, 0.209, 0.085]
616	200721_acatabd_cell4_db1b1.npz	[-9.4049 -8.6093 -6.8075 -4.7809]	[0.541, 2.534, 3.771, 29.132]
617	200721_acatabd_cell4_db1b1.npz	[-11.3964 -9.0281 -5.7801 -3.6013 -2.9116]	[1.596, 0.022, 70.712, 1.147, 0.221]
618	200720_acatABDnolink_cell3_db2b4.npz	[14.2556 13.7213]	[0.175, 8.162]
619	200808_abd_cell4_db3b9.npz	[-12.9074 -12.8641]	[0.035, 0.061]
620	200808_abd_cell4_db3b9.npz	[13.0283 12.2723]	[0.117, 1.105]
621	200808_abd_cell4_db3b9.npz	[-13.6875 -12.7399]	[0.053, 0.066]
622	200721_acatabd_cell3_db2b7.npz	[-14.5689 -13.843 ]	[0.053, 8.416]
623	200721_acatabd_cell3_db2b7.npz	[-14.5544 -14.4304 -13.1975]	[1.03, 0.144, 1.65]
624	200721_acatabd_cell3_db2b7.npz	[-15.6475 -14.7123]	[0.003, 0.04]
625	200721_acatabd_cell3_db2b7.npz	[13.1415 12.0482]	[3.791, 1.607]
626	200806_abd_cell3_db3b18.npz	[15.4751 15.3858 14.4288 14.2869 13.5404 11.2965 9.4383 8.2774 6.919 5.8842 4.0108 2.9368]	[0.006, 0.027, 0.033, 0.07, 0.724, 0.115, 0.108, 0.166, 0.247, 0.046, 0.047, 0.167]
627	200806_abd_cell3_db3b18.npz	[15.7134 14.4914 14.1838 14.5278 13.0909 11.3902 11.2051 9.9288 7.7535 2.735 2.1916]	[0.078, 0.038, 0.048, 6.025, 3.147, 0.918, 0.47, 0.052, 1.395, 0.011, 0.05]
628	200831_abd_cell3_db1b3.npz	[13.127 12.9557]	[0.057, 0.062]
629	200831_abd_cell3_db1b3.npz	[-11.0339 -10.2945 -9.0104]	[0.031, 0.889, 0.123]
630	200831_abd_cell3_db1b3.npz	[-7.7602 -7.2713 -3.7196]	[0.06, 0.323, 0.015]
631	200807_abd_cell1_db2b8.npz	[12.1682 12.7355]	[0.059, 10.834]
632	200807_abd_cell1_db2b8.npz	[12.0144 11.3639]	[2.092, 0.728]
633	200807_abd_cell1_db2b8.npz	[13.0275 4.0788]	[7.548, 0.007]
634	200807_abd_cell1_db2b8.npz	[-9.5389 -9.5525 -9.4534 -3.4808]	[0.088, 0.095, 16.334, 0.596]
635	200807_abd_cell1_db2b8.npz	[15.8444 3.4863]	[2.315, 0.116]
636	200807_abd_cell1_db2b8.npz	[-10.4464 -10.1949]	[0.389, 2.323]
637	200807_abd_cell1_db2b8.npz	[-8.5335 -8.2476]	[0.431, 3.91]
638	200807_abd_cell1_db2b8.npz	[12.6082 11.8898]	[0.357, 0.357]
639	200807_abd_cell1_db2b8.npz	[-10.1368 -9.9966]	[1.138, 3.504]
640	200807_abd_cell1_db2b8.npz	[-9.7994 -7.7508]	[0.567, 0.862]
641	200807_abd_cell1_db2b8.npz	[-7.6726 -7.442 ]	[1.096, 1.888]
642	200807_abd_cell1_db2b8.npz	[11.177 0.8754]	[18.025, 0.015]
643	200807_abd_cell1_db2b8.npz	[11.6191 8.3367]	[0.865, 1.573]
644	200807_abd_cell1_db2b8.npz	[12.4064 11.7994 11.2717]	[0.098, 1.353, 12.593]
645	200807_abd_cell1_db2b8.npz	[11.3567 10.1738]	[0.415, 0.981]
646	200807_abd_cell1_db2b8.npz	[12.2401 10.6042 10.3003]	[0.051, 1.163, 1.572]
647	200807_abd_cell1_db2b8.npz	[-10.0358 -9.656 ]	[0.475, 12.098]
648	200807_abd_cell1_db2b8.npz	[-7.7421 -7.397 ]	[1.031, 2.047]
649	200807_abd_cell1_db2b8.npz	[-9.0584 -3.0614]	[10.389, 0.099]
650	200807_abd_cell1_db2b8.npz	[13.5536 13.1977 12.6052]	[1.056, 2.999, 0.427]
651	200801_abd_new_gfpslips_db3b5.npz	[16.5006 15.8312 16.7613]	[2.003, 10.483, 59.344]
652	200808_abd_cell1_db1b7.npz	[10.3924 10.0011]	[0.841, 10.024]
653	200808_abd_cell1_db1b7.npz	[10.1267 9.9171]	[0.03, 3.478]
654	200808_abd_cell1_db1b7.npz	[12.4378 10.9235]	[0.052, 0.026]
655	200808_abd_cell1_db1b7.npz	[13.3595 13.2967 12.834 ]	[0.722, 2.122, 0.186]
656	200808_abd_cell1_db1b7.npz	[11.9068 10.156 8.479 ]	[0.159, 0.249, 0.362]
657	200808_abd_cell1_db1b7.npz	[11.5451 8.4136 6.9157]	[0.071, 0.01, 0.022]
658	200808_abd_cell3_db2b10.npz	[-11.4269 -9.367 -8.0974 -2.6727 -2.0521]	[0.104, 0.138, 0.971, 0.891, 0.028]
659	200808_abd_cell3_db2b10.npz	[-9.4812 -8.2701 -4.2118]	[0.011, 0.021, 0.021]
660	200808_abd_cell3_db2b10.npz	[12.6561 12.5796]	[0.326, 0.805]
661	200808_abd_cell3_db2b10.npz	[12.9483 11.832 9.9724 7.7919 5.8358 5.5119]	[0.649, 0.4, 0.063, 2.906, 2.682, 0.585]
662	200808_abd_cell3_db2b10.npz	[14.7433 13.3242 9.7832 8.1433 8.0464]	[0.102, 6.546, 0.915, 42.874, 2.709]
663	200808_abd_cell3_db2b10.npz	[15.9906 13.2015 12.4074]	[0.044, 0.318, 1.236]
664	200808_abd_cell3_db2b10.npz	[13.0292 15.201 15.0387 12.5428 11.432 10.5976 10.1438 9.5171]	[0.072, 0.559, 0.488, 29.208, 0.1, 3.639, 100.228, 0.599]
665	200809_abd_cell3_db2b6b.npz	[5.1412 4.6671]	[0.128, 0.36]
666	200809_abd_cell3_db2b6b.npz	[6.5333 5.5063 4.0866 4.0109 2.9009 3.2568 3.2688 1.8874]	[0.071, 16.967, 2.989, 0.898, 0.956, 18.855, 0.67, 0.047]
667	200807_abd_cell6_db1b7.npz	[16.2111 15.397 14.3499 13.2997 11.3578 10.4483 8.723 5.898 ]	[0.136, 3.083, 0.051, 0.098, 21.212, 0.815, 3.505, 5.1]
668	200807_abd_cell6_db1b7.npz	[11.9084 11.1468 8.8358 6.9197 5.235 3.3218 2.9964 1.4852]	[0.035, 2.975, 4.614, 4.538, 16.495, 0.139, 2.399, 0.219]
669	200807_abd_cell6_db1b7.npz	[11.8918 12.7811 11.3142 10.4568 9.2009 7.6339 6.4853]	[0.038, 18.141, 3.13, 2.922, 0.339, 0.18, 1.986]
670	200807_abd_cell6_db1b7.npz	[7.5724 7.3246 6.8049 4.9525 4.6674 3.81 4.2068 3.4747 3.0384]	[3.493, 0.527, 1.221, 2.092, 0.027, 1.714, 2.366, 0.045, 0.023]
671	200807_abd_cell6_db1b7.npz	[17.3403 16.9596 12.7216 11.6265 9.6164 6.9622 5.1429 3.5363]	[0.558, 3.034, 43.526, 2.202, 0.329, 2.198, 0.97, 1.691]
672	200807_abd_cell6_db1b10.npz	[-12.4779 -11.4886]	[0.015, 3.389]
673	200807_abd_cell6_db1b10.npz	[15.2048 14.8017]	[0.036, 0.368]
674	200807_abd_cell6_db1b10.npz	[-12.1806 -12.2975]	[0.028, 8.474]
675	200807_abd_cell6_db1b10.npz	[-12.403 -12.1108]	[0.85, 1.302]
676	200807_abd_cell6_db1b10.npz	[13.3434 12.4159 12.01 ]	[0.03, 1.239, 1.008]
677	200807_abd_cell6_db1b10.npz	[-12.428 -12.3491]	[1.333, 4.223]
678	200807_abd_cell6_db1b10.npz	[11.8664 11.7096 11.0285]	[0.047, 0.113, 1.803]
679	200807_abd_cell6_db1b10.npz	[13.4818 12.9847 11.9826]	[0.092, 0.719, 0.063]
680	200807_abd_cell6_db1b10.npz	[14.6441 14.592 ]	[0.06, 1.342]
681	200807_abd_cell6_db1b10.npz	[14.5602 14.3692]	[1.179, 1.338]
682	200807_abd_cell6_db1b10.npz	[-10.6616 -10.4677]	[0.062, 0.108]
683	200807_abd_cell6_db1b10.npz	[12.3943 12.124 ]	[1.126, 0.585]
684	200807_abd_cell6_db1b10.npz	[15.3338 15.0678]	[0.02, 0.29]
685	200807_abd_cell6_db1b10.npz	[14.9377 14.7292 14.6561]	[0.411, 0.172, 0.974]
686	200807_abd_cell6_db1b10.npz	[-12.4604 -12.3596]	[0.392, 6.919]
687	200807_abd_cell6_db1b10.npz	[13.0536 12.3617]	[0.399, 4.632]
688	200807_abd_cell6_db1b10.npz	[13.8874 13.8622]	[0.061, 1.085]
689	200807_abd_cell6_db1b10.npz	[14.272 15.0539]	[0.039, 0.377]
690	200807_abd_cell6_db1b10.npz	[12.2133 11.9593 11.6728]	[0.222, 0.321, 1.687]
691	200807_abd_cell6_db1b10.npz	[7.831 7.0266 7.0423]	[0.111, 2.106, 0.088]
692	200807_abd_cell6_db1b10.npz	[-12.3287 -11.9952]	[0.02, 1.04]
693	200807_abd_cell6_db1b10.npz	[12.791 12.3883]	[1.768, 7.333]
694	200802_abd_cell1_db2b6.npz	[13.8551 12.1278]	[0.319, 0.482]
695	200802_abd_cell1_db2b6.npz	[-7.3786 -6.7729]	[0.005, 0.075]
696	200802_abd_cell1_db2b6.npz	[-12.4541 -3.279 ]	[3.446, 2.066]
697	200802_abd_cell1_db2b6.npz	[15.5307 15.7657]	[0.171, 9.609]
698	200802_abd_cell1_db2b6.npz	[-12.3697 -11.7246]	[0.039, 1.506]
699	200802_abd_cell1_db2b6.npz	[-5.5401 -5.5019]	[1.776, 0.706]
700	200802_abd_cell1_db2b6.npz	[15.3185 15.3389]	[0.038, 3.181]
701	200721_acatabd_cell2_db3b6.npz	[-11.478 -10.3283 -8.5777 -6.7058 -5.1756 -4.0819]	[0.479, 2.421, 0.205, 2.695, 1.532, 18.468]
702	200809_abd_cell3_db2b6c.npz	[14.1897 12.9064 12.9085 11.0373 8.421 ]	[2.545, 47.279, 4.634, 61.086, 5.247]
703	200809_abd_cell3_db2b6c.npz	[14.5939 14.0795]	[2.379, 0.882]
704	200809_abd_cell3_db2b6c.npz	[-13.216 -10.2161 -7.9355 -7.2076 -3.6034]	[0.223, 1.721, 0.038, 0.043, 0.061]
705	200809_abd_cell3_db2b6c.npz	[13.9562 13.9295 10.3668 8.5194]	[0.045, 36.488, 0.322, 4.872]
706	200809_abd_cell3_db2b6c.npz	[14.8088 14.443 ]	[0.312, 0.625]
707	200809_abd_cell3_db2b6c.npz	[8.4948 8.3395 7.82 ]	[0.053, 4.223, 0.477]
708	200809_abd_cell3_db2b6c.npz	[12.8818 13.2187]	[0.047, 0.397]
709	200809_abd_cell3_db2b6c.npz	[13.9197 13.4727]	[0.102, 0.606]
710	200809_abd_cell3_db2b6c.npz	[13.1621 12.9965]	[0.101, 0.186]
711	200809_abd_cell3_db2b6c.npz	[-8.7477 -8.4877 -8.2807]	[0.574, 0.366, 0.327]
712	200809_abd_cell3_db2b6c.npz	[13.2816 11.1824]	[15.349, 0.758]
713	200809_abd_cell3_db2b6c.npz	[12.9379 12.8875]	[0.996, 0.307]
714	200809_abd_cell1_db1b2c.npz	[-6.4054 -1.5187]	[0.104, 0.011]
715	200801_cell3_abd_db1b1.npz	[6.9123 6.503 ]	[8.24, 16.381]
716	200807_abd_cell1_db1b5.npz	[-5.9586 -4.3476 -2.5923]	[1.713, 0.038, 0.034]
717	200807_abd_cell1_db1b5.npz	[-13.4038 -12.8703 -10.6741 -10.267 -8.9674 -5.8814]	[0.887, 9.306, 0.956, 2.777, 2.661, 93.346]
718	200720_acatABDnolink_cell3_db1b2.npz	[11.4198 10.1145]	[0.005, 0.011]
719	200720_acatABDnolink_cell3_db1b2.npz	[10.7771 4.8706]	[1.113, 0.023]
720	200801_cell3_abd_db2b10.npz	[16.6815 15.7451]	[0.005, 0.085]
721	200807_abd_cell1_db2b8d.npz	[-10.2439 -9.5053 -4.7644 -2.1048]	[0.025, 0.69, 0.137, 0.008]
722	200807_abd_cell1_db2b8d.npz	[14.5611 13.5413]	[0.032, 10.84]
723	200807_abd_cell1_db2b8d.npz	[-8.7988 -9.5516 -4.709 ]	[0.027, 2.065, 0.02]
724	200807_abd_cell1_db2b8d.npz	[-10.2353 -9.5955]	[0.054, 1.407]
725	200807_abd_cell1_db2b8d.npz	[11.8917 11.3726]	[0.253, 1.636]
726	200807_abd_cell1_db2b8d.npz	[12.6504 11.7453]	[0.03, 0.088]
727	200807_abd_cell1_db2b8d.npz	[15.048 13.846]	[0.044, 2.725]
728	200807_abd_cell1_db2b8d.npz	[-11.2822 -11.2786 -4.2024]	[0.224, 5.997, 0.128]
729	200807_abd_cell1_db2b8d.npz	[14.9414 14.695 ]	[2.941, 1.42]
730	200807_abd_cell1_db2b8d.npz	[-12.0738 -11.5105]	[0.022, 3.473]
731	200807_abd_cell1_db2b8d.npz	[14.0079 13.7495]	[0.04, 0.02]
732	200807_abd_cell1_db2b8d.npz	[-13.0403 -12.4101]	[0.132, 4.445]
733	200807_abd_cell1_db2b8d.npz	[14.5269 14.7782]	[0.03, 0.155]
734	200807_abd_cell1_db2b8d.npz	[14.4248 13.5207 13.211 ]	[0.129, 0.187, 0.619]
735	200807_abd_cell1_db2b8d.npz	[-9.8732 -9.5726 -9.2189]	[0.033, 0.156, 4.35]
736	200807_abd_cell1_db2b8d.npz	[-11.536 -11.4711]	[0.19, 0.407]
737	200807_abd_cell1_db2b8d.npz	[14.185 12.5024]	[0.12, 0.874]
738	200807_abd_cell5_db2b8.npz	[13.1726 9.9123 7.2594]	[0.887, 4.752, 2.873]
739	200807_abd_cell5_db2b8.npz	[14.6044 12.4457 11.76 8.7349]	[2.937, 0.02, 1.389, 0.662]
740	200807_abd_cell5_db2b8.npz	[7.2538 6.8624 4.731 3.1252 2.6048]	[0.021, 0.843, 0.113, 0.115, 0.308]
741	200807_abd_cell5_db2b8.npz	[-11.788 -10.8013]	[0.009, 0.237]
742	200807_abd_cell5_db2b8.npz	[18.0972 17.6545 15.4834 10.9787 8.8654 7.4366 3.6078]	[0.192, 0.491, 2.394, 1.374, 0.702, 0.263, 0.147]
743	200807_abd_cell5_db2b8.npz	[-11.2848 -8.8672]	[0.059, 0.354]
744	200807_abd_cell5_db2b8.npz	[11.7994 8.9466 5.7446]	[1.007, 0.046, 0.043]
745	200807_abd_cell5_db2b8.npz	[11.9893 15.0563]	[0.925, 216.971]
746	200807_abd_cell5_db3b14.npz	[-12.9889 -12.6473]	[0.28, 1.408]
747	200727_acatabd_cell1_db2b5.npz	[11.876 11.2945 10.9178 10.0314 9.8002 9.1808 7.2774 6.2738 4.5917]	[2.175, 0.406, 0.113, 0.163, 0.063, 0.717, 0.593, 0.012, 0.01]
748	200721_acatabd_cell4_db2b5.npz	[7.0488 3.296 ]	[0.07, 0.04]
749	200721_acatabd_cell4_db2b5.npz	[7.3497 6.1302 4.0775 3.7807]	[0.011, 0.015, 0.015, 0.011]
750	200721_acatabd_cell4_db2b5.npz	[7.9924 7.1127 6.8024 5.8271 4.2148]	[0.017, 0.842, 0.227, 0.135, 0.161]
751	200721_acatabd_cell4_db2b5.npz	[6.3863 4.4997]	[0.022, 0.061]
752	200721_acatabd_cell4_db2b5.npz	[-6.1835 -5.4376 -3.7598]	[5.526, 0.297, 0.99]
753	200721_acatabd_cell4_db2b5.npz	[6.4163 5.7298 2.3511]	[0.215, 0.201, 4.857]
754	200721_acatabd_cell4_db2b5.npz	[-7.6607 -4.4182]	[0.164, 51.435]
755	200721_acatabd_cell4_db2b5.npz	[-8.5384 -5.6099 -4.2045 -2.6162]	[1.183, 34.456, 3.592, 1.235]
756	200721_acatabd_cell4_db2b5.npz	[7.873 5.2248 1.7441]	[0.004, 0.025, 0.032]
757	200721_acatabd_cell4_db2b5.npz	[-5.5932 -4.7301 -2.9928]	[20.871, 10.426, 0.218]
758	200721_acatabd_cell4_db2b5.npz	[5.0013 3.3772]	[0.029, 0.007]
759	200721_acatabd_cell4_db2b5.npz	[-8.4916 -2.8116]	[12.032, 0.213]
760	200721_acatabd_cell4_db2b5.npz	[6.9004 5.0311 3.5021]	[0.008, 0.361, 0.066]
761	200721_acatabd_cell4_db2b5.npz	[-5.7087 -5.1428 -4.0093 -2.9239]	[0.53, 3.368, 1.307, 2.043]
762	200721_acatabd_cell4_db2b5.npz	[-9.7155 -8.1102 -7.2903 -5.4998 -2.4713]	[0.907, 0.722, 0.744, 44.376, 0.179]
763	200808_abd_cell1_db2b16.npz	[15.7473 15.4964]	[0.15, 0.04]
764	200808_abd_cell4_db4b11d.npz	[18.361 17.6733 10.9448 9.7451]	[0.081, 0.345, 1.479, 0.085]
765	200808_abd_cell4_db4b11d.npz	[-9.1292 -7.8773 -7.2559 -5.9913 -4.6069 -4.2028]	[0.056, 2.123, 6.065, 0.212, 1.713, 0.412]
766	200808_abd_cell4_db4b11d.npz	[-14.6608 -14.093 -12.0336 -9.78 -7.9776]	[0.311, 13.821, 80.615, 140.012, 4.178]
767	200807_abd_cell5_db3b15.npz	[-2.9165 -0.9798]	[0.198, 0.017]
768	200801_abd_new_gfpslips_db4b7.npz	[-10.8923 -9.8526 -7.7067 -6.0967 -4.2938]	[0.128, 0.485, 5.39, 1.498, 61.972]
769	200829_abd_cell2_d2b8.npz	[15.1653 14.879 ]	[0.067, 0.389]
770	200829_abd_cell2_d2b8.npz	[-11.3909 -11.1157 -10.4913 -9.9305 -9.3329 -7.7336 -6.0729 -4.6595 -2.9648 -2.2889 -0.9264]	[1.082, 1.772, 0.782, 0.898, 2.086, 7.824, 0.085, 0.328, 0.151, 0.13, 0.084]
771	200829_abd_cell2_d2b8.npz	[13.4184 12.9721 11.816 11.1509 9.5926 6.8255 6.3358 5.2453 4.4361]	[0.044, 0.354, 9.874, 23.094, 0.079, 0.073, 0.234, 0.061, 0.047]
772	200829_abd_cell2_d2b8.npz	[-10.636 -9.6037 -5.9751]	[1.303, 20.862, 4.211]
773	200829_abd_cell2_d2b8.npz	[13.5284 12.8603 12.0999]	[0.028, 0.479, 2.318]
774	200829_abd_cell2_d2b8.npz	[12.6317 12.0831 10.1444 8.8172 7.4786 1.7372]	[0.043, 0.286, 2.552, 0.101, 1.583, 0.297]
775	200809_abd_cell1_db1b2e.npz	[-12.3076 -11.9699 -11.4372]	[0.11, 0.065, 2.205]
776	200809_abd_cell1_db1b2e.npz	[8.1432 7.9919 6.4143 5.1788 4.6386 3.7084 2.7687]	[0.038, 1.186, 2.001, 5.975, 0.991, 2.981, 0.046]
777	200807_abd_cell5_db3b11.npz	[-11.1794 -10.3573]	[6.577, 1.454]
778	200721_acatabd_cell3_db1b6.npz	[-5.8461 -4.9545 -3.598 ]	[14.722, 3.601, 30.79]
779	200802_abd_cell1_db3b7.npz	[18.2343 17.1812]	[0.28, 2.245]
780	200802_abd_cell1_db3b7.npz	[17.3033 16.5184]	[0.019, 0.009]
781	200802_abd_cell1_db3b7.npz	[15.3956 14.7568]	[0.023, 3.452]
782	200802_abd_cell1_db3b7.npz	[13.0033 12.4977]	[0.078, 0.025]
783	200802_abd_cell1_db3b7.npz	[16.2978 15.0814]	[0.604, 1.201]
784	200802_abd_cell1_db3b7.npz	[-13.7359 -13.3843 -13.1717]	[0.498, 0.39, 0.431]
785	200802_abd_cell1_db3b7.npz	[-8.3104 -2.0577]	[0.818, 0.011]
786	200802_abd_cell1_db3b7.npz	[18.4277 17.4823]	[0.006, 7.622]
787	200802_abd_cell1_db3b7.npz	[14.8572 14.4046 13.6885]	[0.031, 0.046, 0.959]
788	200802_abd_cell1_db3b7.npz	[-14.1908 -13.4967 -12.4734]	[0.075, 0.79, 0.571]
789	200802_abd_cell1_db3b7.npz	[-13.1138 -12.6472 -10.8119]	[1.159, 1.521, 15.531]
790	200802_abd_cell1_db3b7.npz	[16.7683 15.9174]	[0.671, 3.023]
791	200802_abd_cell1_db3b7.npz	[15.4465 17.4599 17.0525]	[0.008, 0.017, 3.984]
792	200802_abd_cell1_db3b7.npz	[16.3286 15.7721 15.8305]	[0.112, 0.594, 0.281]
793	200802_abd_cell1_db3b7.npz	[16.0594 17.8615]	[0.031, 20.242]
794	200802_abd_cell1_db3b7.npz	[15.3025 15.7525]	[0.11, 15.986]
795	200802_abd_cell1_db3b7.npz	[-12.3399 -11.6248]	[0.023, 1.412]
796	200719_acatABDnolnk_cell1_db2b2.npz	[5.7347 1.4411]	[0.088, 0.013]
797	200807_abd_cell5_db3b10.npz	[-10.843 -10.5864 -9.1923 -6.0564 -5.2159 -4.3647]	[0.537, 7.002, 96.496, 5.156, 1.785, 0.896]
798	200807_abd_cell5_db3b10.npz	[14.3524 13.6448 12.6425 10.8242 10.6086 9.4748]	[0.009, 2.128, 0.012, 4.341, 0.155, 13.892]
799	200809_abd_cell1_db1b2d.npz	[11.5582 8.5375]	[0.155, 2.021]
800	200809_abd_cell1_db1b2d.npz	[-10.7942 -10.6403]	[0.196, 0.136]
801	200809_abd_cell1_db1b2d.npz	[-11.8677 -11.3115 -10.784 ]	[0.029, 0.667, 3.142]
802	200809_abd_cell1_db1b2d.npz	[13.258 12.9471 2.7595]	[8.942, 16.663, 0.178]
803	200809_abd_cell1_db1b2d.npz	[12.686 12.2489]	[0.275, 1.302]
804	200809_abd_cell1_db1b2d.npz	[-9.4315 -9.0181 -8.7583]	[0.434, 0.905, 3.637]
805	200809_abd_cell1_db1b2d.npz	[-9.8918 -8.9959]	[0.647, 16.391]
806	200809_abd_cell1_db1b2d.npz	[11.9116 9.0011]	[0.47, 0.882]
807	200831_abd_cell3_db2b11.npz	[-13.6195 -13.2031 -10.1034 -7.9898 -6.6239 -5.324 -3.9326]	[0.152, 2.054, 10.653, 0.192, 0.074, 0.109, 0.117]
808	200831_abd_cell3_db2b13.npz	[18.8853 18.8607]	[0.025, 1.085]
809	200807_abd_cell5_db3b12.npz	[-14.2697 -5.4803]	[1.046, 4.362]
810	200721_acatabd_cell1_db2b7.npz	[15.991 3.8352]	[0.061, 0.006]
811	200721_acatabd_cell1_db2b7.npz	[-13.3934 -13.4514 -12.4189]	[0.006, 0.033, 0.156]
812	200721_acatabd_cell1_db2b7.npz	[-12.5886 -12.0311 -11.3575 -11.2952]	[0.079, 0.543, 0.515, 2.072]
813	200721_acatabd_cell1_db2b7.npz	[-11.1652 -10.9457]	[0.304, 0.937]
814	200721_acatabd_cell1_db2b7.npz	[12.0739 11.4129]	[0.015, 0.029]
815	200721_acatabd_cell1_db2b7.npz	[8.0947 6.1961]	[0.004, 0.008]
816	200721_acatabd_cell1_db2b7.npz	[-11.482 -11.0503]	[0.254, 0.315]
817	200721_acatabd_cell1_db2b7.npz	[-12.1973 -11.4701]	[0.257, 1.825]
818	200721_acatabd_cell1_db2b7.npz	[-7.5045 -6.8241]	[0.008, 0.071]
819	200721_acatabd_cell1_db2b7.npz	[-11.1203 -2.3519]	[0.358, 0.025]
820	200721_acatabd_cell1_db2b7.npz	[-11.9494 -11.2745 -10.5121]	[0.01, 0.136, 0.189]
821	200721_acatabd_cell1_db2b7.npz	[17.6389 11.0159]	[0.209, 0.192]
822	200721_acatabd_cell1_db2b7.npz	[-11.6554 -10.8862]	[0.503, 2.981]
823	200721_acatabd_cell1_db2b7.npz	[-13.2255 -12.2251]	[0.031, 0.251]
824	200721_acatabd_cell1_db2b7.npz	[17.1564 13.7731]	[0.004, 0.041]
825	200721_acatabd_cell1_db2b7.npz	[-8.6129 -8.2498 -7.6877]	[0.15, 0.105, 1.12]
826	200721_acatabd_cell1_db2b7.npz	[-13.4167 -12.5298]	[0.104, 0.073]
827	200721_acatabd_cell1_db2b7.npz	[-11.7431 -11.9239 -11.1712]	[0.033, 0.485, 0.269]
828	200721_acatabd_cell1_db2b7.npz	[-8.764 -8.5008 -7.9481 -7.3914]	[0.032, 0.616, 0.894, 0.071]
829	200721_acatabd_cell1_db2b7.npz	[-12.4546 -10.9369]	[0.092, 1.695]
830	200721_acatabd_cell1_db2b7.npz	[-12.9367 -12.8425]	[0.22, 0.789]
831	200721_acatabd_cell1_db2b7.npz	[-14.3885 -13.6677]	[0.193, 0.25]
832	200721_acatabd_cell1_db2b7.npz	[-14.9025 -14.1657]	[0.071, 0.246]
833	200721_acatabd_cell1_db2b7.npz	[-5.9376 -5.4373]	[0.356, 2.73]
834	200721_acatabd_cell1_db2b7.npz	[-4.4444 -1.352 ]	[1.235, 0.004]
835	200721_acatabd_cell1_db2b7.npz	[-13.3501 -13.3732 -1.9627]	[0.013, 0.287, 0.024]
836	200721_acatabd_cell1_db2b7.npz	[-12.7837 -2.8636]	[0.448, 0.069]
837	200721_acatabd_cell1_db2b7.npz	[18.4913 17.8186]	[0.18, 0.079]
838	200721_acatabd_cell1_db2b7.npz	[-14.9262 -13.7246]	[0.17, 3.082]
839	200721_acatabd_cell1_db2b7.npz	[7.7181 2.082 ]	[0.008, 0.007]
840	200721_acatabd_cell1_db2b7.npz	[16.6812 15.3792]	[0.036, 0.263]
841	200721_acatabd_cell1_db2b7.npz	[-13.3171 -12.6167]	[0.233, 0.397]
842	200721_acatabd_cell1_db2b7.npz	[-13.7922 -13.287 ]	[0.195, 0.707]
843	200721_acatabd_cell1_db2b7.npz	[-14.495 -13.9733]	[0.011, 0.174]
844	200721_acatabd_cell1_db2b7.npz	[16.4444 16.2779]	[0.008, 0.015]
845	200721_acatabd_cell1_db2b7.npz	[19.3953 17.8835]	[0.038, 0.035]
846	200721_acatabd_cell1_db2b7.npz	[-14.623 -14.0273]	[0.139, 0.089]
847	200721_acatabd_cell1_db2b7.npz	[-14.4067 -13.9576 -13.4212]	[0.101, 0.27, 0.128]
848	200721_acatabd_cell1_db2b7.npz	[17.2436 16.315 ]	[0.185, 0.083]
849	200721_acatabd_cell1_db2b7.npz	[-14.4469 -14.1264]	[0.258, 1.343]
850	200721_acatabd_cell1_db2b7.npz	[-13.9745 -13.5817 -9.5398 -4.7353]	[0.027, 1.971, 1.093, 0.107]
851	200808_abd_cell4_db4b11c.npz	[8.478 8.5307]	[0.006, 0.014]
852	200808_abd_cell4_db4b11c.npz	[-10.1242 -9.6698 -8.9174]	[0.03, 0.133, 9.491]
853	200808_abd_cell4_db4b11c.npz	[19.1918 19.1592 18.4734 17.6633]	[0.031, 0.044, 0.078, 0.073]
854	200801_abd_new_gfpslips_cell2_db3b7.npz	[-11.5805 -11.3864]	[0.037, 0.088]
855	200801_abd_new_gfpslips_cell2_db3b7.npz	[14.9039 14.1063 13.2612]	[0.068, 0.051, 5.823]
856	200801_abd_new_gfpslips_cell2_db3b7.npz	[14.4112 11.9024]	[0.127, 13.283]
857	200721_acatabd_cell4_db2b3.npz	[-5.3596 -3.9055]	[4.396, 8.051]
858	200721_acatabd_cell4_db2b3.npz	[4.9199 1.4157]	[1.05, 0.006]
859	200720_acatABDnolink_cell3_db3b5.npz	[17.7718 18.4581 17.4876]	[19.313, 1.034, 16.184]
860	200720_acatABDnolink_cell3_db3b5.npz	[-10.518 -6.5618]	[12.3, 0.363]
861	200720_acatABDnolink_cell3_db3b5.npz	[14.2559 2.0244]	[0.251, 0.044]
862	200720_acatABDnolink_cell3_db3b5.npz	[-10.9573 -8.7037]	[0.498, 10.075]
863	200720_acatABDnolink_cell3_db3b5.npz	[-12.3612 -9.9093]	[0.009, 0.006]
864	200720_acatABDnolink_cell3_db3b5.npz	[15.0784 14.2785]	[0.166, 2.898]
865	200720_acatABDnolink_cell3_db3b5.npz	[15.4509 14.5472]	[0.018, 0.723]
866	200720_acatABDnolink_cell3_db3b5.npz	[7.5778 6.8844]	[0.241, 0.409]
867	200807_abd_cell3_db2b8.npz	[12.1574 11.3259]	[0.037, 1.345]
868	200808_abd_cell1_db2b10.npz	[11.3528 10.4999 10.4401]	[0.855, 0.687, 8.581]
869	200808_abd_cell4_db4b11b.npz	[17.1662 15.3071 13.6213 10.7261]	[0.041, 0.07, 0.119, 0.19]
870	200808_abd_cell4_db4b11b.npz	[-10.5513 -10.2519 -7.45 -3.8732]	[0.253, 2.113, 21.095, 95.763]
871	200808_abd_cell4_db4b11b.npz	[15.1273 14.734 15.8524 16.3596]	[0.083, 0.032, 42.42, 39.36]
872	200809_abd_cell1_db3b10b.npz	[9.9972 9.176 8.8651 8.1651 6.6029]	[0.1, 0.13, 0.068, 0.348, 3.768]
873	200809_abd_cell1_db3b10b.npz	[12.6073 12.3028]	[0.272, 0.082]
874	200809_abd_cell1_db3b10b.npz	[10.6618 11.0667]	[0.054, 2.59]
875	200809_abd_cell1_db3b10b.npz	[-11.9569 -11.6412 -11.1584 -10.2805 -8.533 ]	[0.076, 0.653, 0.027, 0.019, 31.826]
876	200809_abd_cell1_db3b10b.npz	[-10.8482 -10.9986]	[0.062, 6.255]
877	200809_abd_cell1_db3b10b.npz	[12.9608 12.5159 11.8977 11.7486]	[0.037, 0.292, 0.033, 0.831]
878	200809_abd_cell1_db3b10b.npz	[11.0679 3.4616]	[3.283, 0.155]
879	200809_abd_cell1_db3b10b.npz	[13.7743 13.2337 8.5128]	[22.296, 3.681, 2.669]
880	200806_abd_cell3_db2b9.npz	[13.884 8.4713]	[0.004, 0.007]
881	200807_abd_cell1_db2b8d.npz	[-4.2457 -3.8412]	[0.007, 0.094]
882	200807_abd_cell1_db2b8d.npz	[10.3068 10.5599]	[0.056, 2.647]
883	200807_abd_cell1_db2b8d.npz	[-12.0473 -10.5609 -9.715 ]	[2.236, 0.222, 5.641]
884	200807_abd_cell1_db2b8d.npz	[15.2002 14.7504]	[0.058, 0.106]
885	200807_abd_cell1_db2b8d.npz	[-7.5976 -7.2032]	[0.023, 0.065]
886	200807_abd_cell1_db2b8d.npz	[-10.4383 -10.1883 -9.6691]	[0.028, 0.042, 0.127]
887	200807_abd_cell1_db2b8d.npz	[14.5409 9.7333]	[0.428, 1.351]
888	200807_abd_cell1_db2b8d.npz	[-11.0627 -10.465 -10.4881]	[0.024, 0.104, 0.178]
889	200807_abd_cell1_db2b8d.npz	[7.4016 6.8242 5.9127]	[0.029, 0.036, 0.013]
890	200807_abd_cell1_db2b8d.npz	[-10.1144 -2.3097 -0.4221]	[2.072, 0.051, 0.036]
891	200807_abd_cell1_db2b8d.npz	[-11.8284 -11.6132]	[0.049, 2.248]
892	200807_abd_cell1_db2b8d.npz	[-11.8282 -11.419 ]	[0.034, 0.784]
893	200807_abd_cell1_db2b8d.npz	[13.8093 12.7664 11.7924]	[0.017, 0.036, 4.645]
894	200807_abd_cell1_db2b8d.npz	[-10.3001 -9.6521]	[0.152, 1.023]
895	200807_abd_cell1_db2b8d.npz	[14.216 13.6297]	[0.187, 6.46]
896	200807_abd_cell1_db2b8d.npz	[13.9545 13.6212 13.2262]	[0.051, 0.298, 0.242]
897	200807_abd_cell1_db2b8d.npz	[8.2767 7.8413 3.998 ]	[0.009, 0.014, 0.011]
898	200807_abd_cell1_db2b8d.npz	[-11.7587 -11.3085]	[1.585, 5.684]
899	200807_abd_cell1_db2b8d.npz	[14.824 15.2283 13.3325 13.024 ]	[0.063, 0.066, 0.327, 0.467]
