# Supplementary material for: Mechanism of the cadherin–catenin F-actin catch bond interaction
Source: eLife. 2022 Aug 1;11:e80130. doi: 10.7554/eLife.80130 (PMC9402232; doi:10.7554/eLife.80130)
Supplement: Figure 4—figure supplement 1—source data 1. [file elife-80130-fig4-figsupp1-data1.xlsx]

## Sheet: Sheet1
	step forces	step lifetimes
0	[0.7667]	[0.92]
1	[0.6054]	[0.619]
2	[0.6449]	[1.603]
3	[-0.8824]	[1.245]
4	[-1.2674]	[0.148]
5	[1.7015]	[3.465]
6	[-1.4582]	[4.094]
7	[-0.4009]	[2.11]
8	[-1.2059]	[2.543]
9	[-0.5869]	[1.998]
10	[0.2176]	[0.908]
11	[-0.411]	[0.88]
12	[0.5582]	[1.509]
13	[-1.2801]	[0.294]
14	[-0.6936]	[1.313]
15	[-1.5199]	[1.565]
16	[0.0769]	[4.274]
17	[-2.0137]	[11.863]
18	[1.0587]	[5.784]
19	[-0.4068]	[7.22]
20	[0.0959]	[10.054]
21	[0.0236]	[4.421]
22	[-0.1042]	[6.481]
23	[-0.6481]	[0.167]
24	[-0.1586]	[2.061]
25	[-0.5314]	[0.249]
26	[0.6993]	[0.587]
27	[-0.5951]	[2.121]
28	[0.4516]	[1.045]
29	[0.7527]	[0.243]
30	[-1.3074]	[3.588]
31	[1.3034]	[3.34]
32	[0.7554]	[16.533]
33	[-1.9065]	[0.753]
34	[1.1641]	[0.355]
35	[-0.547]	[1.959]
36	[-0.9793]	[2.585]
37	[1.7489]	[0.426]
38	[-1.1425]	[0.696]
39	[-0.7777]	[28.69]
40	[0.8487]	[1.316]
41	[0.46]	[0.623]
42	[0.3767]	[1.661]
43	[-0.0286]	[1.576]
44	[0.2509]	[0.49]
45	[0.5294]	[1.505]
46	[-0.1771]	[0.911]
47	[-0.2763]	[1.05]
48	[0.2091]	[8.088]
49	[0.6059]	[5.296]
50	[0.0326]	[1.198]
51	[0.1786]	[0.592]
52	[0.7133]	[5.696]
53	[-1.5482]	[1.969]
54	[0.8139]	[4.197]
55	[-0.1788]	[1.108]
56	[-1.505]	[0.726]
57	[-0.6551]	[0.549]
58	[-0.5714]	[0.305]
59	[0.7169]	[0.705]
60	[-0.3198]	[7.526]
61	[-0.0545]	[3.596]
62	[1.2601]	[0.392]
63	[-0.3496]	[1.271]
64	[-0.2076]	[1.945]
65	[0.1173]	[6.655]
66	[1.6253]	[1.581]
67	[0.7489]	[4.66]
68	[0.7098]	[0.269]
69	[-0.689]	[2.188]
70	[0.8061]	[4.021]
71	[1.4527]	[2.709]
72	[-0.7327]	[1.195]
73	[-0.2241]	[0.336]
74	[-0.1085]	[2.271]
75	[-0.1711]	[1.497]
76	[-0.6264]	[0.469]
77	[-1.1778]	[1.367]
78	[0.3152]	[5.88]
79	[0.2305]	[1.667]
80	[-1.4077]	[1.027]
81	[1.47]	[0.48]
82	[-1.5459]	[0.822]
83	[-1.1205]	[3.464]
84	[0.0336]	[0.426]
85	[-1.9333]	[1.85]
86	[-0.748]	[6.266]
87	[0.9812]	[5.927]
88	[2.2309]	[1.501]
89	[-1.5072]	[2.51]
90	[0.8726]	[0.18]
91	[-0.1083]	[3.755]
92	[2.2975]	[0.441]
93	[-2.0905]	[0.531]
94	[1.4242]	[1.124]
95	[-1.306]	[0.323]
96	[0.6792]	[0.167]
97	[1.8597]	[5.403]
98	[-0.9649]	[0.19]
99	[1.674]	[0.685]
100	[-1.8542]	[1.975]
101	[0.9624]	[2.57]
102	[1.2587]	[0.201]
103	[-1.3987]	[0.108]
104	[-1.6033]	[0.233]
105	[0.554]	[1.203]
106	[2.0448]	[0.259]
107	[-1.4903]	[3.051]
108	[1.843]	[0.082]
109	[1.6679]	[2.702]
110	[0.8245]	[0.566]
111	[-0.1697]	[0.239]
112	[-0.8137]	[0.207]
113	[0.2367]	[7.819]
114	[-1.5224]	[0.394]
115	[-2.4866]	[1.216]
116	[2.5736]	[0.694]
117	[1.9945]	[2.558]
118	[-0.7541]	[2.986]
119	[0.6444]	[0.173]
120	[0.3349]	[3.125]
121	[0.076]	[3.01]
122	[0.7154]	[1.071]
123	[0.9123]	[0.189]
124	[0.6966]	[3.91]
125	[-2.1893]	[0.84]
126	[0.1758]	[1.145]
127	[-0.3847]	[1.004]
128	[-0.0868]	[2.924]
129	[0.5715]	[0.581]
130	[0.193]	[5.972]
131	[0.7338]	[1.043]
132	[-1.4397]	[0.652]
133	[-1.0602]	[6.85]
134	[0.3769]	[6.684]
135	[-0.1759]	[1.337]
136	[-1.1676]	[1.765]
137	[-0.9002]	[0.521]
138	[-0.6924]	[0.187]
139	[-0.7719]	[0.093]
140	[-0.393]	[0.228]
141	[0.1622]	[2.942]
142	[0.3577]	[1.778]
143	[-1.5179]	[0.04]
144	[0.8349]	[0.186]
