# Supplementary material for: Mechanism of the cadherin–catenin F-actin catch bond interaction
Source: eLife. 2022 Aug 1;11:e80130. doi: 10.7554/eLife.80130 (PMC9402232; doi:10.7554/eLife.80130)
Supplement: Figure 4—source data 1. [file elife-80130-fig4-data1.xlsx]

## Sheet: Sheet1
	file name	step forces	step lifetimes
0	211031_25uM_ternary_cell1_db2b4.npz	[7.5853 5.5307 4.4152]	[0.017, 0.008, 0.181]
1	211031_25uM_ternary_cell1_db2b4.npz	[6.6543 5.2898 5.5885 5.2996]	[0.146, 0.247, 1.001, 0.526]
2	211031_25uM_ternary_cell1_db2b4.npz	[-12.0305 -8.8622]	[0.022, 0.265]
3	211031_25uM_ternary_cell1_db2b4.npz	[5.9552 4.4604 3.9911 4.2905]	[0.037, 1.167, 0.517, 3.112]
4	211031_25uM_ternary_cell1_db2b4.npz	[4.7711 3.7313]	[0.408, 3.361]
5	211031_25uM_ternary_cell1_db2b4.npz	[-8.2622 -7.6281]	[0.339, 0.548]
6	211031_25uM_ternary_cell1_db2b4.npz	[-9.4917 -7.5568 -7.552 ]	[0.008, 0.47, 0.436]
7	211031_25uM_ternary_cell1_db2b4.npz	[5.4284 4.3514]	[0.153, 1.24]
8	211031_25uM_ternary_cell1_db2b4.npz	[5.5372 4.5696 3.5964 4.2677]	[0.38, 0.306, 1.215, 2.177]
9	211030_ternarydH1_cell3_db2b2.npz	[-4.9343 -3.3883 -2.5523]	[0.092, 0.342, 1.088]
10	211030_ternarydH1_cell3_db2b2.npz	[11.2607 8.3335 7.6022 6.4601 4.7759 3.0626 2.4014]	[0.016, 1.253, 0.088, 2.272, 1.127, 0.109, 0.625]
11	211030_ternarydH1_cell3_db2b2.npz	[8.9111 7.5626]	[0.054, 0.026]
12	211030_ternarydH1_cell3_db2b2.npz	[-12.7714 -12.3377 -9.7395 -7.5234 -6.3339]	[0.018, 0.908, 0.122, 1.102, 2.119]
13	211030_ternarydH1_cell3_db2b2.npz	[2.0354 1.1535 1.5036 0.9083]	[1.668, 2.868, 27.555, 2.829]
14	211113_25uM_ternarydH1_cell4_db1b1b.npz	[-3.2723 -2.6294]	[1.854, 0.471]
15	211113_25uM_ternarydH1_cell4_db1b1b.npz	[-2.4459 -2.1563]	[1.381, 0.684]
16	211113_25uM_ternarydH1_cell4_db1b1b.npz	[-3.4289 -3.1028]	[0.133, 0.165]
17	211113_25uM_ternarydH1_cell4_db1b1b.npz	[3.7566 3.499 ]	[1.009, 0.593]
18	211113_25uM_ternarydH1_cell4_db1b1b.npz	[2.1751 0.9362]	[0.102, 3.859]
19	211113_25uM_ternarydH1_cell4_db1b1b.npz	[-3.6773 -3.132 ]	[0.647, 0.802]
20	211113_25uM_ternarydH1_cell4_db1b1b.npz	[-3.4834 -3.1434]	[0.439, 1.684]
21	211113_25uM_ternarydH1_cell4_db1b1b.npz	[-3.5004 -3.3865]	[0.475, 0.769]
22	211113_25uM_ternarydH1_cell4_db1b1b.npz	[-2.8405 -2.4471]	[0.402, 0.389]
23	211113_25uM_ternarydH1_cell4_db1b1b.npz	[-3.7688 -3.5635]	[0.436, 1.095]
24	211113_25uM_ternarydH1_cell4_db1b1b.npz	[-3.9931 -3.6825]	[0.822, 1.289]
25	211113_25uM_ternarydH1_cell4_db1b1b.npz	[-2.7648 -1.87 ]	[0.822, 2.138]
26	211113_25uM_ternarydH1_cell4_db1b1b.npz	[2.0014 2.06 ]	[1.135, 0.494]
27	211113_25uM_ternarydH1_cell4_db1b1b.npz	[-2.9764 -2.7026 -2.5581]	[0.187, 0.315, 0.76]
28	211113_25uM_ternarydH1_cell4_db1b1b.npz	[-4.1981 -2.9603 -3.573 ]	[0.736, 0.47, 3.335]
29	211031_25uM_ternary_cell1_db2b4b.npz	[-8.2335 -6.0773]	[0.117, 0.495]
30	211031_25uM_ternary_cell1_db2b4b.npz	[4.6008 3.5138 2.5565]	[0.218, 0.439, 2.272]
31	211031_25uM_ternary_cell1_db2b4b.npz	[-10.045 -7.5949 -7.2217]	[0.039, 1.038, 4.006]
32	211031_25uM_ternary_cell1_db2b4b.npz	[5.511 4.2653 3.5412 4.125 ]	[0.185, 1.06, 0.165, 0.341]
33	211031_25uM_ternary_cell1_db2b4b.npz	[5.3891 4.1778 3.114 ]	[0.624, 0.314, 0.102]
34	211114_20uMterndH1_40nmosc_cell3_db3b13.npz	[4.9543 4.6006 3.3748 4.5259 3.2786 4.4417 3.7582 4.6054 3.0517 4.2018 3.1244 4.1658 3.06 4.4004]	[0.073, 0.484, 0.342, 0.923, 0.326, 0.387, 0.024, 0.137, 0.838, 0.408, 0.487, 0.184, 0.041, 0.839]
35	211114_20uMterndH1_40nmosc_cell3_db3b13.npz	[4.7213 3.3781 4.6322 3.3062]	[0.857, 0.692, 0.258, 0.135]
36	211114_20uMterndH1_40nmosc_cell3_db3b13.npz	[3.8329 3.5748]	[0.089, 0.053]
37	211114_20uMterndH1_40nmosc_cell3_db3b13.npz	[4.1455 3.0209 3.9555]	[0.423, 0.203, 0.409]
38	211114_20uMterndH1_40nmosc_cell3_db3b13.npz	[5.012 3.9509]	[0.654, 1.794]
39	211031_25uM_ternary_cell1_db1b1b.npz	[7.8067 7.6327 7.3653 3.2505 1.3398]	[0.238, 0.428, 0.596, 1.619, 4.388]
40	211031_25uM_ternary_cell1_db1b1b.npz	[-10.2031 -5.9683 -5.0397]	[0.028, 0.051, 0.275]
41	211031_25uM_ternary_cell1_db1b1b.npz	[-9.0397 -8.6476 -7.915 ]	[0.074, 0.097, 0.222]
42	211031_25uM_ternary_cell1_db1b1b.npz	[-9.0114 -6.5364]	[0.025, 2.213]
43	211031_25uM_ternary_cell1_db1b1b.npz	[7.98 7.2104]	[0.457, 0.084]
44	211031_25uM_ternary_cell1_db1b1b.npz	[-8.8241 -6.8738]	[0.066, 0.519]
45	211031_25uM_ternary_cell1_db1b1b.npz	[8.7105 8.7087 8.1169]	[0.038, 0.083, 0.135]
46	211031_25uM_ternary_cell1_db1b1b.npz	[-10.0328 -8.7249]	[0.013, 0.595]
47	211031_25uM_ternary_cell1_db1b1b.npz	[6.4521 6.8154]	[0.043, 0.091]
48	211029_25uM_Ecad_cell2_db4b6.npz	[-9.5689 -9.2799]	[0.223, 0.288]
49	211029_25uM_Ecad_cell2_db4b6.npz	[7.8338 5.7879]	[0.02, 0.043]
50	211029_25uM_Ecad_cell2_db4b6.npz	[7.9695 6.1842]	[0.085, 0.179]
51	211029_25uM_Ecad_cell2_db4b6.npz	[-8.6014 -7.1713 -5.4483]	[0.15, 0.017, 4.735]
52	211029_25uM_Ecad_cell2_db4b6.npz	[5.8304 4.2275]	[0.014, 0.609]
53	211029_25uM_Ecad_cell2_db4b6.npz	[8.8585 8.4585 6.508 ]	[0.073, 0.135, 0.357]
54	211029_25uM_Ecad_cell2_db4b6.npz	[7.6516 6.1671]	[0.152, 0.081]
55	211029_25uM_Ecad_cell2_db4b6.npz	[8.0845 6.2549]	[0.07, 0.304]
56	211029_25uM_Ecad_cell2_db4b6.npz	[-10.1334 -7.7687]	[0.018, 0.679]
57	211029_25uM_Ecad_cell2_db4b6.npz	[7.4637 6.0243]	[0.009, 0.031]
58	211029_25uM_Ecad_cell2_db4b6.npz	[-9.9122 -8.3117]	[0.007, 0.263]
59	211029_25uM_Ecad_cell2_db4b6.npz	[-8.5559 -7.6196]	[0.007, 0.705]
60	211029_25uM_Ecad_cell2_db4b6.npz	[6.8411 5.5758]	[0.432, 2.702]
61	211029_25uM_Ecad_cell2_db4b6.npz	[6.6847 5.3329]	[0.389, 0.972]
62	211029_25uM_Ecad_cell2_db4b6.npz	[-10.2009 -7.8587 -7.6506]	[0.006, 0.246, 1.167]
63	211029_25uM_Ecad_cell2_db4b6.npz	[-9.6874 -8.949 -8.2229]	[0.009, 0.255, 0.091]
64	211029_25uM_Ecad_cell2_db4b6.npz	[6.8037 5.0426]	[0.092, 0.01]
65	211029_25uM_Ecad_cell2_db4b6.npz	[-9.9597 -7.3096]	[0.009, 0.03]
66	211029_25uM_Ecad_cell2_db4b6.npz	[-10.153 -8.4287]	[0.006, 0.423]
67	211029_25uM_Ecad_cell2_db4b6.npz	[6.7847 5.5904]	[0.023, 1.44]
68	211029_25uM_Ecad_cell2_db4b6.npz	[8.3695 7.7308]	[0.02, 0.135]
69	211114_20uMterndH1_40nmosc_cell3_db2b2.npz	[-2.94 -1.7062]	[0.648, 0.944]
70	211114_20uMterndH1_40nmosc_cell3_db2b2.npz	[-2.8317 -1.926 ]	[0.05, 0.069]
71	211114_20uMterndH1_40nmosc_cell3_db2b2.npz	[-3.5876 -3.2523]	[0.064, 0.259]
72	211114_20uMterndH1_40nmosc_cell3_db2b2.npz	[4.0337 4.2202]	[0.025, 0.038]
73	211114_20uMterndH1_40nmosc_cell3_db2b2.npz	[-2.5206 -1.5447]	[0.068, 0.076]
74	211114_20uMterndH1_40nmosc_cell3_db2b2.npz	[-3.3588 -1.8859]	[0.098, 0.265]
75	211114_20uMterndH1_40nmosc_cell3_db2b2.npz	[-2.4396 -1.3818]	[0.173, 2.27]
76	211114_20uMterndH1_40nmosc_cell3_db2b2.npz	[-2.4102 -1.7349]	[0.018, 0.409]
77	211114_20uMterndH1_40nmosc_cell3_db2b2.npz	[-2.6669 -1.5696]	[0.067, 0.215]
78	211031_25uM_ternary_cell1_db3b9.npz	[-8.6841 -7.1667 -5.7884 -3.2819]	[0.027, 0.13, 1.972, 1.037]
79	211030_ternarydH1_cell3_db3b3b.npz	[11.6951 9.9795]	[0.403, 0.04]
80	211030_ternarydH1_cell3_db3b3b.npz	[-13.1943 -10.3592]	[0.054, 3.354]
81	211030_ternarydH1_cell3_db3b3b.npz	[-10.0463 -7.7212]	[4.556, 2.115]
82	211030_ternarydH1_cell3_db3b3b.npz	[10.8955 8.3948]	[0.593, 0.304]
83	211030_ternarydH1_cell3_db3b3b.npz	[10.987 8.4029]	[0.027, 0.57]
84	211030_ternarydH1_cell3_db3b3b.npz	[-11.203 -8.7849 -8.1505]	[0.023, 0.312, 0.802]
85	211030_ternarydH1_cell3_db3b3b.npz	[9.7537 9.2295 8.6397 6.7336 4.9656 4.3729]	[0.025, 0.034, 0.015, 0.221, 0.067, 5.377]
86	211030_ternarydH1_cell3_db3b3b.npz	[-9.8072 -9.6178 -9.022 ]	[0.653, 1.36, 0.979]
87	211030_ternarydH1_cell3_db3b3b.npz	[8.357 8.5806 8.2589 8.1762]	[0.012, 0.191, 0.688, 0.251]
88	211030_ternarydH1_cell2_db3b3.npz	[-2.9682 -2.8357 -2.5004]	[0.879, 0.448, 7.988]
89	211031_25uM_ternarydH1_cell3_db1b2b.npz	[-11.1605 -10.5331 -11.2016 -10.3264 -8.5873 -8.1804]	[1.315, 0.117, 0.068, 0.047, 4.019, 7.205]
90	211031_25uM_ternarydH1_cell3_db1b2b.npz	[11.328 11.5907 10.9839 9.4711]	[0.089, 0.031, 0.195, 3.311]
91	211031_25uM_ternarydH1_cell3_db1b2b.npz	[11.709 8.7626 8.3536]	[0.054, 0.584, 0.396]
92	211031_25uM_ternarydH1_cell3_db1b2b.npz	[13.0206 10.7265 8.6043]	[0.016, 0.422, 1.541]
93	211031_25uM_ternarydH1_cell3_db1b2b.npz	[-12.2942 -8.9738 -7.9196 -7.8952 -7.0425]	[0.01, 0.403, 1.22, 0.584, 0.149]
94	211031_25uM_ternarydH1_cell3_db1b2b.npz	[-13.1662 -7.7242 -7.2972]	[0.022, 2.328, 1.419]
95	211031_25uM_ternarydH1_cell3_db1b2b.npz	[ 9.753 11.2189 9.1109]	[0.032, 0.103, 0.111]
96	211031_25uM_ternarydH1_cell3_db1b2b.npz	[12.2065 10.5583]	[0.343, 12.675]
97	211031_25uM_ternarydH1_cell3_db1b2b.npz	[-13.4938 -12.5934 -10.8797]	[0.052, 0.048, 1.307]
98	211031_25uM_ternarydH1_cell3_db1b2b.npz	[-11.4396 -10.5533 -11.0968 -10.7705]	[0.672, 0.093, 0.481, 0.044]
99	211031_25uM_ternarydH1_cell3_db1b2b.npz	[-10.7931 -8.3572]	[0.181, 0.238]
100	211031_25uM_ternarydH1_cell3_db1b2b.npz	[ 8.6035 10.2949]	[0.018, 0.26]
101	211031_25uM_ternarydH1_cell3_db1b2b.npz	[9.4747 8.8472 9.1456 9.28 8.7038 7.1965]	[1.602, 0.046, 1.334, 1.596, 0.05, 3.677]
102	211031_25uM_ternarydH1_cell3_db1b2b.npz	[-12.1667 -11.637 -9.9285]	[0.051, 0.046, 0.51]
103	211031_25uM_ternarydH1_cell3_db1b2b.npz	[-11.2146 -10.8789]	[0.308, 0.341]
104	211031_25uM_ternarydH1_cell3_db1b2b.npz	[-9.5549 -6.1098 -5.0056 -5.7466 -4.4409 -5.335 -4.1395 -3.1265]	[3.949, 0.039, 0.142, 0.086, 0.306, 0.12, 1.355, 0.078]
105	211031_25uM_ternarydH1_cell3_db1b2b.npz	[10.7604 13.3104 12.2201 11.2356 9.7712 7.7449 6.2358 5.4657 4.7548 6.1032 5.2881 6.0686 5.3153 6.3702 4.9482 3.0199 1.4189]	[0.028, 0.287, 0.324, 0.405, 0.242, 0.083, 0.721, 1.511, 0.046, 25.972, 0.093, 0.052, 0.486, 0.144, 0.092, 1.072, 1.854]
106	211031_25uM_ternarydH1_cell3_db1b2b.npz	[-15.2435 -14.4008 -13.8686 -12.8958 -11.3523 -10.4627 -9.7034 -8.791 -6.269 -5.2957 -3.5601 -2.2503 -1.4241]	[0.03, 0.036, 0.045, 0.047, 1.036, 0.736, 0.152, 2.769, 18.535, 7.792, 42.781, 1.029, 1.46]
107	211114_20uMterndH1_40nmosc_cell3_db2b5.npz	[-4.0497 -3.2027 -4.0441 -2.5567]	[0.083, 0.086, 1.066, 1.116]
108	211114_20uMterndH1_40nmosc_cell3_db2b5.npz	[-3.6555 -2.0317]	[1.801, 1.897]
109	211114_20uMterndH1_40nmosc_cell3_db2b5.npz	[-3.7424 -2.3931]	[0.34, 0.697]
110	211114_20uMterndH1_40nmosc_cell3_db2b5.npz	[-2.5522 -1.846 -2.6288 -1.9225]	[2.387, 0.434, 1.129, 0.113]
111	211114_20uMterndH1_40nmosc_cell3_db2b4.npz	[-4.092 -2.4333]	[0.054, 0.626]
112	211114_20uMterndH1_40nmosc_cell3_db2b4.npz	[-6.2936 -5.1932 -3.9911 -2.9466]	[0.057, 0.04, 0.028, 0.139]
113	211031_25uM_ternary_cell1_db3b9.npz	[10.2554 7.8303 3.1437]	[0.018, 6.503, 0.858]
114	211031_25uM_ternary_cell1_db3b9.npz	[-8.8343 -7.3338 -7.066 -6.641 -2.7883 -1.5423]	[0.022, 0.051, 0.577, 3.338, 3.333, 0.322]
115	211031_25uM_ternary_cell1_db3b9.npz	[10.8076 9.6157 8.6596 8.4336 8.4515 8.2997 1.9257]	[0.167, 0.013, 0.215, 0.193, 1.044, 1.191, 0.465]
116	211031_25uM_ternary_cell1_db3b9.npz	[-9.9973 -7.9288]	[0.226, 0.178]
117	211031_25uM_ternary_cell1_db3b9.npz	[11.3033 10.1637]	[0.019, 0.05]
118	211031_25uM_ternary_cell1_db3b9.npz	[-9.7109 -7.6945 -3.9807 -2.2641 -1.1203 -0.9616]	[0.213, 0.086, 0.773, 0.74, 0.235, 0.724]
119	211031_25uM_ternary_cell1_db3b9.npz	[14.5024 14.7555 12.6659 9.7885 8.5905 4.0949 3.0393]	[0.015, 0.01, 1.282, 0.019, 3.314, 0.066, 0.073]
120	211031_25uM_ternary_cell1_db3b9.npz	[-7.6531 -5.5502 -3.4542]	[0.034, 0.35, 0.675]
121	211031_25uM_ternary_cell1_db3b9.npz	[9.816 7.6728 6.5006 2.3816]	[0.026, 0.813, 2.201, 0.524]
122	211031_25uM_ternary_cell1_db3b9.npz	[-9.5858 -6.5016 -5.3014]	[0.973, 0.252, 0.187]
123	211031_25uM_ternary_cell1_db3b9.npz	[6.9135 1.5643]	[1.71, 0.533]
124	211031_25uM_ternary_cell1_db3b9.npz	[-9.6958 -8.624 -6.4755 -5.0979 -3.3523]	[0.021, 1.113, 0.022, 0.065, 2.133]
125	211031_25uM_ternary_cell1_db3b9.npz	[13.343 12.1749 10.6658 9.3707 8.2632]	[0.167, 1.283, 0.155, 0.038, 0.189]
126	211031_25uM_ternary_cell1_db3b9.npz	[-11.9079 -10.7784 -9.8052 -7.5798 -7.2589]	[0.088, 0.093, 0.026, 0.496, 0.637]
127	211030_ternarydH1_cell3_db4b12.npz	[-4.7786 -4.5498]	[0.266, 0.465]
128	211114_20uMterndH1_40nmosc_cell3_db2b6.npz	[-3.3594 -2.0217 -1.0011 -1.7196 -1.1269 -1.7655 -0.9026 -1.6531]	[0.501, 1.461, 1.193, 3.299, 0.533, 3.934, 0.457, 6.677]
129	211029_25uM_Ecyto_cell6_db4b6d.npz	[-7.6743 -7.6367]	[2.046, 0.795]
130	211029_25uM_Ecyto_cell6_db4b6d.npz	[7.1229 6.2164 4.4731]	[0.007, 0.964, 0.265]
131	211029_25uM_Ecyto_cell6_db4b6d.npz	[-9.0522 -8.5179 -8.5333]	[0.19, 0.85, 1.582]
132	211029_25uM_Ecyto_cell6_db4b6d.npz	[6.6234 5.1445]	[0.738, 3.191]
133	211029_25uM_Ecyto_cell6_db4b6d.npz	[-11.4936 -8.9343]	[0.026, 0.899]
134	211029_25uM_Ecyto_cell6_db4b6d.npz	[-9.402 -9.1319]	[0.45, 0.381]
135	211029_25uM_Ecyto_cell6_db4b6d.npz	[6.4876 5.7387]	[0.018, 0.039]
136	211029_25uM_Ecyto_cell6_db4b6d.npz	[5.3619 4.2637]	[0.782, 2.245]
137	211029_25uM_Ecyto_cell6_db4b6d.npz	[7.4242 5.709 ]	[0.118, 0.466]
138	211029_25uM_Ecyto_cell6_db4b6d.npz	[8.4947 7.8735 5.8083]	[0.024, 0.057, 2.077]
139	211029_25uM_Ecyto_cell6_db4b6d.npz	[-10.2745 -8.0135]	[0.012, 0.585]
140	211029_25uM_Ecyto_cell6_db4b6d.npz	[-11.8228 -8.6786]	[0.135, 1.398]
141	211029_25uM_Ecyto_cell6_db4b6d.npz	[4.9492 4.7218]	[0.823, 1.014]
142	211029_25uM_Ecyto_cell6_db4b6d.npz	[-10.2263 -8.1284]	[0.029, 1.755]
143	211029_25uM_Ecyto_cell6_db4b6d.npz	[6.9207 5.7117 5.2997]	[0.073, 0.357, 1.429]
144	211029_25uM_Ecyto_cell6_db4b6d.npz	[6.3482 5.6979]	[0.025, 0.151]
145	211029_25uM_Ecyto_cell6_db4b6d.npz	[7.5891 5.3782]	[0.092, 0.318]
146	211029_25uM_Ecyto_cell6_db4b6d.npz	[-10.7086 -8.6765]	[0.01, 1.014]
147	211029_25uM_Ecyto_cell6_db4b6d.npz	[-9.8231 -7.7797 -7.3692 -6.9523 -6.0154]	[0.056, 2.379, 1.956, 7.0, 1.487]
148	211029_25uM_Ecyto_cell6_db4b6d.npz	[-6.5867 -5.1278]	[2.095, 20.38]
149	211029_25uM_Ecad_cell2_db4b6d.npz	[-9.2537 -7.2584]	[0.018, 2.119]
150	211029_25uM_Ecad_cell2_db4b6d.npz	[5.657 4.8315]	[0.472, 1.635]
151	211029_25uM_Ecad_cell2_db4b6d.npz	[7.2412 5.3617]	[0.072, 0.142]
152	211029_25uM_Ecad_cell2_db4b6d.npz	[5.4317 4.3562]	[0.384, 3.346]
153	211029_25uM_Ecad_cell2_db4b6d.npz	[6.3608 4.7931]	[0.435, 0.588]
154	211029_25uM_Ecad_cell2_db4b6d.npz	[5.1462 4.5982]	[0.205, 0.039]
155	211029_25uM_Ecad_cell2_db4b6d.npz	[-9.7062 -7.3395 -7.1116]	[0.014, 0.24, 0.452]
156	211029_25uM_Ecad_cell2_db4b6d.npz	[-9.3716 -7.8241 -7.1966]	[0.017, 0.089, 2.944]
157	211029_25uM_Ecad_cell2_db4b6d.npz	[6.2576 5.1333]	[0.146, 0.051]
158	211029_25uM_Ecad_cell2_db4b6d.npz	[5.3781 4.2012]	[0.035, 0.383]
159	211029_25uM_Ecad_cell2_db4b6d.npz	[-9.407 -6.3623 -5.104 ]	[0.027, 1.239, 0.026]
160	211029_25uM_Ecad_cell2_db4b6d.npz	[5.4086 4.3831 5.4616]	[0.264, 0.311, 0.026]
161	211029_25uM_Ecad_cell2_db4b6d.npz	[6.4192 6.0699]	[0.109, 0.219]
162	211029_25uM_Ecyto_cell6_db4b6c.npz	[6.155 5.4187]	[0.111, 0.021]
163	211029_25uM_Ecyto_cell6_db4b6c.npz	[7.4682 5.6352]	[0.013, 3.001]
164	211029_25uM_Ecyto_cell6_db4b6c.npz	[-9.2309 -5.8676]	[0.652, 0.896]
165	211029_25uM_Ecyto_cell6_db4b6c.npz	[-10.5385 -7.6658]	[0.034, 0.122]
166	211029_25uM_Ecyto_cell6_db4b6c.npz	[3.9441 4.5031]	[0.032, 0.152]
167	211029_25uM_Ecyto_cell6_db4b6c.npz	[7.4598 5.4455]	[0.015, 1.407]
168	211029_25uM_Ecyto_cell6_db4b6c.npz	[6.8468 5.5475]	[0.029, 0.775]
169	211029_25uM_Ecyto_cell6_db4b6c.npz	[7.1579 5.3494]	[0.009, 0.261]
170	211029_25uM_Ecyto_cell6_db4b6c.npz	[-9.1484 -9.0104]	[0.48, 3.431]
171	211029_25uM_Ecyto_cell6_db4b6c.npz	[5.2643 4.071 5.0764]	[1.842, 0.796, 0.543]
172	211029_25uM_Ecyto_cell6_db4b6c.npz	[7.2027 5.2664]	[0.077, 0.166]
173	211029_25uM_Ecyto_cell6_db4b6c.npz	[8.1023 6.111 ]	[0.047, 0.834]
174	211029_25uM_Ecyto_cell6_db4b6c.npz	[6.5839 5.4816]	[0.07, 2.211]
175	211029_25uM_Ecyto_cell6_db4b6c.npz	[-9.9492 -7.8111]	[0.014, 0.657]
176	211029_25uM_Ecyto_cell6_db4b6c.npz	[6.0372 4.9283]	[0.079, 0.993]
177	211029_25uM_Ecyto_cell6_db4b6c.npz	[5.9677 5.6034]	[0.028, 4.628]
178	211029_25uM_Ecyto_cell6_db4b6c.npz	[8.1239 5.8317]	[0.065, 0.428]
179	211029_25uM_Ecyto_cell6_db4b6c.npz	[7.8467 6.098 ]	[0.1, 5.744]
180	211029_25uM_Ecyto_cell6_db4b6c.npz	[6.2351 4.3961]	[0.334, 0.118]
181	211029_25uM_Ecyto_cell6_db4b6c.npz	[-9.484 -7.6794]	[0.017, 4.086]
182	211114_25uMterndH1_35nmosc_cell2_db1b2.npz	[-3.739 -3.1451]	[0.062, 0.159]
183	211114_25uMterndH1_35nmosc_cell2_db1b2.npz	[1.4345 1.284 ]	[0.262, 0.201]
184	211114_25uMterndH1_35nmosc_cell2_db1b2.npz	[-2.3154 -2.0727 -1.7676]	[2.14, 1.761, 5.388]
185	211114_25uMterndH1_35nmosc_cell2_db1b2.npz	[1.2882 0.5613]	[4.53, 0.229]
186	211031_25uM_ternary_cell1_db2b4.npz	[5.9959 7.3098]	[0.017, 0.09]
187	211031_25uM_ternary_cell1_db2b4.npz	[-10.4236 -7.9074]	[0.019, 0.142]
188	211031_25uM_ternary_cell1_db2b4.npz	[-10.1229 -7.3621 -7.1908]	[0.021, 1.142, 2.221]
189	211031_25uM_ternary_cell1_db2b4.npz	[8.4135 6.4886]	[0.084, 0.316]
190	211031_25uM_ternary_cell1_db2b4.npz	[-9.3101 -7.2945 -5.3133 -4.9372]	[0.025, 0.064, 0.442, 1.142]
191	211031_25uM_ternary_cell1_db2b4.npz	[-11.3703 -9.906 -8.2627]	[0.03, 0.043, 0.405]
192	211031_25uM_ternary_cell1_db2b4.npz	[-8.5803 -8.4285 -8.3481]	[1.566, 0.636, 1.317]
193	211031_25uM_ternary_cell1_db2b4.npz	[-8.5487 -6.5031 -5.5865]	[0.994, 3.239, 0.525]
194	211031_25uM_ternary_cell1_db2b4.npz	[4.8287 4.3248 4.0507]	[0.019, 0.085, 0.574]
195	211031_25uM_ternary_cell1_db2b4.npz	[-7.6313 -6.0342]	[0.008, 1.816]
196	211031_25uM_ternary_cell1_db2b4.npz	[-10.5206 -8.832 ]	[0.01, 2.379]
197	211031_25uM_ternary_cell1_db2b4.npz	[4.8483 4.2681 3.7023]	[0.029, 0.349, 0.938]
198	211031_25uM_ternary_cell1_db2b4.npz	[5.9323 4.6216 4.0759 5.0644 4.0689 2.4005]	[0.118, 11.568, 0.622, 0.174, 0.88, 0.079]
199	211031_25uM_ternary_cell1_db3b6b.npz	[12.3717 11.1551]	[0.081, 0.086]
200	211031_25uM_ternary_cell1_db3b8.npz	[-4.0235 -4.6853 -3.5159 -2.1684]	[2.746, 1.097, 2.273, 2.593]
201	211031_25uM_ternary_cell1_db3b8.npz	[12.4823 8.6559 7.9077 6.4311 4.9887 3.9689 2.4753]	[0.802, 4.922, 0.293, 0.261, 2.411, 31.222, 0.051]
202	211114_20uMterndH1_40nmosc_cell3_db1b1.npz	[4.8294 2.9096]	[1.924, 3.297]
203	211114_20uMterndH1_40nmosc_cell3_db1b1.npz	[5.9616 4.4549 2.6615]	[0.1, 1.063, 0.383]
204	211114_25uMterndH1_35nmosc_cell2_db1b1.npz	[1.607 1.2179 1.7985]	[1.269, 0.277, 1.895]
205	211113_25uM_ternarydH1_cell4_db2b2b.npz	[8.6622 6.2448]	[0.053, 0.152]
206	211113_25uM_ternarydH1_cell4_db2b2b.npz	[-6.0314 -4.4646]	[0.521, 0.583]
207	211113_25uM_ternarydH1_cell4_db2b2b.npz	[5.3662 3.7219]	[0.539, 0.12]
208	211113_25uM_ternarydH1_cell4_db2b2b.npz	[-5.7268 -4.1546]	[0.335, 2.503]
209	211113_25uM_ternarydH1_cell4_db2b2b.npz	[4.0524 5.6247 4.1545]	[0.171, 0.378, 0.074]
210	211113_25uM_ternarydH1_cell4_db2b2b.npz	[4.4683 4.1953 2.5222]	[0.012, 0.128, 1.146]
211	211113_25uM_ternarydH1_cell4_db2b2b.npz	[-5.8345 -4.8529]	[0.203, 0.16]
212	211113_25uM_ternarydH1_cell4_db2b2b.npz	[7.3518 6.2358 4.4553]	[0.046, 0.179, 0.753]
213	211113_25uM_ternarydH1_cell4_db2b2b.npz	[-5.4269 -4.2065 -5.6561 -5.4236 -4.0659]	[0.056, 0.453, 0.526, 0.33, 0.071]
214	211113_25uM_ternarydH1_cell4_db2b2b.npz	[8.3663 6.2653]	[0.052, 0.616]
215	211113_25uM_ternarydH1_cell4_db2b2b.npz	[5.818 4.3022]	[0.137, 0.136]
216	211113_25uM_ternarydH1_cell4_db2b2b.npz	[6.4852 4.3326]	[0.175, 1.783]
217	211113_25uM_ternarydH1_cell4_db2b2b.npz	[-5.0295 -4.5548 -4.3848]	[0.031, 0.09, 0.205]
218	211113_25uM_ternarydH1_cell4_db2b2b.npz	[-6.2477 -4.7274]	[0.176, 1.111]
219	211113_25uM_ternarydH1_cell4_db2b2b.npz	[-5.2837 -3.5129 -4.6791]	[0.327, 2.122, 0.921]
220	211113_25uM_ternarydH1_cell4_db2b2b.npz	[5.4918 5.4273 3.8061 5.5055 4.2402 5.4433 3.982 ]	[0.336, 0.388, 0.525, 1.547, 0.065, 1.144, 0.168]
221	211029_25uM_Ecad_cell2_db4b6d.npz	[-10.4972 -8.1468 -7.8365 -6.9828]	[0.008, 0.058, 0.093, 3.568]
222	211029_25uM_Ecad_cell2_db4b6d.npz	[-6.9648 -5.1886]	[0.013, 0.201]
223	211029_25uM_Ecad_cell2_db4b6d.npz	[5.9672 4.7583 5.8269]	[0.061, 0.298, 0.091]
224	211029_25uM_Ecad_cell2_db4b6d.npz	[6.0089 5.2373]	[0.008, 0.161]
225	211029_25uM_Ecad_cell2_db4b6d.npz	[4.9721 4.3853 5.3821 4.3379 5.2647 4.4977 5.2882 4.3149]	[0.081, 0.327, 0.209, 0.183, 0.581, 0.066, 0.643, 0.552]
226	211029_25uM_Ecad_cell2_db4b6d.npz	[5.3016 5.1886]	[0.203, 0.109]
227	211029_25uM_Ecad_cell2_db4b6d.npz	[-9.9062 -7.0572]	[0.012, 0.708]
228	211029_25uM_Ecad_cell2_db4b6d.npz	[4.849 4.1354]	[0.164, 0.206]
229	211029_25uM_Ecad_cell2_db4b6d.npz	[-9.0544 -7.0227]	[0.022, 1.59]
230	211029_25uM_Ecad_cell2_db4b6d.npz	[-7.4741 -7.0025]	[0.009, 0.067]
231	211029_25uM_Ecad_cell2_db4b6d.npz	[-9.127 -6.9914]	[0.009, 0.35]
232	211029_25uM_Ecad_cell2_db4b6d.npz	[-7.9773 -5.9999]	[0.029, 3.702]
233	211029_25uM_Ecad_cell2_db4b6d.npz	[-8.1996 -6.0591]	[0.01, 0.227]
234	211029_25uM_Ecad_cell2_db4b6d.npz	[-6.9378 -5.1587]	[0.09, 0.319]
235	211029_25uM_Ecad_cell2_db4b6d.npz	[-7.6832 -6.0524]	[0.021, 0.218]
236	211029_25uM_Ecad_cell2_db4b6d.npz	[-9.1542 -6.7685]	[0.016, 1.014]
237	211029_25uM_Ecad_cell2_db4b6d.npz	[-10.7756 -8.5001]	[0.013, 0.604]
238	211029_25uM_Ecad_cell2_db4b6d.npz	[-8.3901 -6.4312]	[0.035, 0.162]
239	211029_25uM_Ecad_cell2_db4b6d.npz	[6.0741 4.8163]	[0.23, 0.082]
240	211029_25uM_Ecad_cell2_db4b6d.npz	[6.2451 4.8188]	[0.424, 0.688]
241	211029_25uM_Ecad_cell2_db4b6d.npz	[-8.4638 -5.8485]	[0.057, 0.062]
242	211029_25uM_Ecad_cell2_db4b6d.npz	[-9.1363 -7.1009]	[0.047, 0.661]
243	211029_25uM_Ecad_cell2_db4b6d.npz	[-7.7127 -7.5865]	[1.42, 1.186]
244	211030_ternarydH1_cell2_db4b6.npz	[-8.5682 -6.4976]	[0.458, 0.174]
245	211030_ternarydH1_cell3_db3b3.npz	[-10.3387 -9.5253]	[0.674, 0.993]
246	211030_ternarydH1_cell3_db3b3.npz	[-12.5724 -9.5526]	[0.009, 0.354]
247	211030_ternarydH1_cell3_db3b3.npz	[9.919 7.9003 7.5939]	[0.01, 0.288, 0.16]
248	211030_ternarydH1_cell3_db3b3.npz	[10.3679 8.2346]	[0.013, 0.682]
249	211030_ternarydH1_cell3_db3b3.npz	[-9.9337 -9.8203]	[0.102, 0.121]
250	211030_ternarydH1_cell3_db3b3.npz	[8.7811 7.6623]	[0.01, 0.14]
251	211030_ternarydH1_cell3_db3b3.npz	[-11.4459 -8.9821]	[0.075, 0.154]
252	211030_ternarydH1_cell3_db3b3.npz	[-12.0789 -11.205 ]	[0.097, 0.133]
253	211030_ternarydH1_cell3_db3b3.npz	[-10.1914 -9.6105]	[0.101, 0.559]
254	211030_ternarydH1_cell3_db3b3.npz	[7.4913 7.2673]	[0.154, 0.074]
255	211030_ternarydH1_cell3_db3b3.npz	[-11.1055 -9.3577]	[0.023, 1.756]
256	211030_ternarydH1_cell3_db3b3.npz	[6.394 7.912]	[0.02, 0.184]
257	211030_ternarydH1_cell3_db3b3.npz	[-11.9647 -10.9216 -9.5288]	[0.12, 0.078, 0.184]
258	211030_ternarydH1_cell3_db3b3.npz	[-11.5463 -9.4315]	[0.088, 0.27]
259	211030_ternarydH1_cell3_db3b3.npz	[-10.3451 -9.9779]	[0.35, 0.254]
260	211030_ternarydH1_cell3_db3b3.npz	[10.2015 7.916 ]	[0.012, 0.978]
261	211030_ternarydH1_cell3_db3b3.npz	[-9.5185 -7.3535]	[0.8, 0.194]
262	211030_ternarydH1_cell3_db3b3.npz	[7.5739 7.2041]	[0.024, 1.943]
263	211030_ternarydH1_cell3_db3b3.npz	[7.925 7.7461]	[0.009, 4.36]
264	211030_ternarydH1_cell3_db3b3.npz	[-11.4903 -11.7188 -9.1862]	[0.096, 0.115, 2.505]
265	211030_ternarydH1_cell3_db3b3.npz	[6.0519 7.4721]	[0.022, 0.575]
266	211030_ternarydH1_cell3_db3b3.npz	[-10.4151 -10.3072]	[0.174, 0.19]
267	211030_ternarydH1_cell3_db3b3.npz	[7.6051 7.2487]	[0.111, 0.111]
268	211030_ternarydH1_cell3_db3b3.npz	[-11.779 -9.9666 -10.0375 -9.7178]	[0.009, 0.688, 2.439, 4.951]
269	211030_ternarydH1_cell3_db3b3.npz	[7.7688 6.7623]	[5.188, 1.237]
270	211030_ternarydH1_cell3_db3b3.npz	[-11.514 -11.2728 -10.8789 -8.9526]	[0.183, 1.051, 0.456, 0.013]
271	211030_ternarydH1_cell3_db3b3.npz	[8.9228 3.01 3.7997 5.1193]	[0.01, 0.161, 1.947, 0.127]
272	211030_ternarydH1_cell3_db3b3.npz	[-9.4738 -8.8781]	[0.486, 3.771]
273	211030_ternarydH1_cell3_db3b4.npz	[-12.2425 -11.598 ]	[0.131, 0.047]
274	211030_ternarydH1_cell3_db3b4.npz	[-11.6918 -11.1724 -9.6994 -9.1328]	[0.034, 0.082, 0.097, 0.253]
275	211030_ternarydH1_cell3_db3b4.npz	[-10.4424 -10.011 -9.9902 -8.048 ]	[0.139, 0.317, 1.567, 0.093]
276	211030_ternarydH1_cell3_db3b4.npz	[10.6347 10.6824 10.05 8.3623]	[0.515, 0.2, 0.151, 0.288]
277	211030_ternarydH1_cell3_db3b4.npz	[-12.628 -11.7111 -9.6742]	[0.013, 0.034, 0.32]
278	211030_ternarydH1_cell3_db3b4.npz	[10.6306 9.4543 8.1558]	[0.098, 0.018, 0.653]
279	211029_25uM_Ecad_cell2_db4b6c.npz	[-5.021 -3.3137 -4.7795 -3.0619]	[0.668, 0.36, 0.417, 1.334]
280	211029_25uM_Ecad_cell2_db4b6c.npz	[-8.2307 -7.7501]	[0.233, 1.509]
281	211029_25uM_Ecad_cell2_db4b6c.npz	[5.4331 4.0177 5.4271 4.4733]	[0.264, 0.286, 2.126, 0.7]
282	211029_25uM_Ecad_cell2_db4b6c.npz	[-11.3739 -8.1739]	[0.009, 0.704]
283	211029_25uM_Ecad_cell2_db4b6c.npz	[-8.8239 -6.6781]	[0.033, 0.233]
284	211029_25uM_Ecad_cell2_db4b6c.npz	[5.8316 4.7359]	[1.625, 0.894]
285	211029_25uM_Ecad_cell2_db4b6c.npz	[-9.2842 -7.2934]	[0.015, 0.598]
286	211029_25uM_Ecad_cell2_db4b6c.npz	[-9.0078 -6.8211 -1.5757]	[0.086, 0.786, 1.778]
287	211029_25uM_Ecad_cell2_db4b6c.npz	[5.8402 4.9758]	[0.124, 1.388]
288	211029_25uM_Ecad_cell2_db4b6c.npz	[-8.9691 -6.8765]	[0.014, 2.435]
289	211029_25uM_Ecad_cell2_db4b6c.npz	[6.0227 4.6736]	[0.345, 0.345]
290	211029_25uM_Ecad_cell2_db4b6b.npz	[6.9736 5.4954]	[0.014, 0.008]
291	211029_25uM_Ecad_cell2_db4b6b.npz	[7.8358 5.3924]	[0.005, 0.006]
292	211029_25uM_Ecad_cell2_db4b6b.npz	[-8.9977 -8.5631]	[0.303, 1.07]
293	211029_25uM_Ecad_cell2_db4b6b.npz	[7.1422 5.6615]	[0.308, 0.221]
294	211029_25uM_Ecad_cell2_db4b6b.npz	[-9.1091 -7.0427 -6.7797 -6.8043]	[0.036, 1.201, 1.956, 4.833]
295	211029_25uM_Ecad_cell2_db4b6b.npz	[5.4858 4.5251 5.667 ]	[0.28, 0.591, 0.655]
296	211029_25uM_Ecad_cell2_db4b6b.npz	[6.2143 4.8632]	[0.034, 0.687]
297	211029_25uM_Ecad_cell2_db4b6b.npz	[6.9317 5.4559]	[0.195, 0.931]
298	211029_25uM_Ecad_cell2_db4b6b.npz	[-10.1242 -7.7772]	[0.015, 0.239]
299	211029_25uM_Ecad_cell2_db4b6b.npz	[6.5094 6.1383]	[0.35, 0.189]
300	211029_25uM_Ecad_cell2_db4b6b.npz	[-7.5421 -7.1728]	[0.075, 0.066]
301	211029_25uM_Ecad_cell2_db4b6b.npz	[7.0439 6.6605 5.8752]	[0.061, 0.123, 0.186]
302	211029_25uM_Ecad_cell2_db4b6b.npz	[-8.1328 -7.8392]	[0.113, 0.103]
303	211029_25uM_Ecad_cell2_db4b6b.npz	[8.7894 6.8661]	[0.015, 0.858]
304	211029_25uM_Ecad_cell2_db4b6b.npz	[-9.3976 -7.7144 -5.8911]	[0.014, 0.74, 2.19]
305	211029_25uM_Ecad_cell2_db4b6b.npz	[-6.2203 -4.8651]	[0.041, 1.095]
306	211029_25uM_Ecad_cell2_db4b6b.npz	[5.5829 4.3479 5.438 ]	[0.971, 3.644, 1.553]
307	211029_25uM_Ecad_cell2_db4b6b.npz	[-8.6271 -6.8038]	[0.039, 1.951]
308	211029_25uM_Ecad_cell2_db4b6b.npz	[5.9512 4.7029]	[2.883, 0.16]
309	211029_25uM_Ecad_cell2_db4b6b.npz	[5.8431 4.7518]	[1.334, 0.463]
310	211029_25uM_Ecad_cell2_db4b6b.npz	[6.7435 5.4397]	[0.069, 1.039]
311	211029_25uM_Ecad_cell2_db4b6b.npz	[6.219 6.0639 5.8414 4.4055]	[0.038, 0.074, 0.242, 0.046]
312	211029_25uM_Ecad_cell2_db4b6b.npz	[-9.4319 -6.8396 -6.108 ]	[0.01, 2.544, 3.747]
313	211029_25uM_Ecad_cell2_db4b6b.npz	[-8.1261 -7.9586]	[0.279, 0.198]
314	211030_ternarydH1_cell3_db3b5.npz	[10.2202 8.2753]	[0.021, 1.618]
315	211030_ternarydH1_cell3_db3b5.npz	[9.5781 8.8408 7.5219]	[0.292, 0.036, 0.383]
316	211030_ternarydH1_cell3_db3b5.npz	[12.1185 9.3591 9.2406 9.1681]	[0.011, 11.876, 2.21, 14.094]
317	211030_ternarydH1_cell3_db3b5.npz	[10.2953 11.0359 8.7914 8.6215]	[0.049, 0.042, 2.941, 2.235]
318	211030_ternarydH1_cell3_db3b5.npz	[12.0829 9.2477]	[0.072, 0.159]
319	211030_ternarydH1_cell3_db3b5.npz	[-15.312 -10.3974 -10.2156]	[0.073, 0.075, 2.067]
320	211030_ternarydH1_cell3_db3b5.npz	[10.5178 8.1993 7.7187]	[0.015, 0.251, 0.237]
321	211030_ternarydH1_cell3_db3b5.npz	[-10.2863 -9.7586 -7.9178]	[0.318, 0.655, 1.149]
322	211030_ternarydH1_cell3_db3b5.npz	[-10.8129 -10.5779 -10.3679]	[0.329, 1.351, 1.051]
323	211030_ternarydH1_cell3_db3b5.npz	[10.2147 9.5151 8.0265]	[0.033, 0.103, 1.814]
324	211030_ternarydH1_cell3_db3b5.npz	[13.8362 11.8646 10.1498]	[0.047, 0.962, 0.399]
325	211030_ternarydH1_cell2_db6b14.npz	[11.3694 10.2835]	[0.017, 0.02]
326	211029_25uM_Ecad_cell1_db1b1.npz	[-11.5834 -8.1405 -7.7477 -6.9711]	[0.013, 0.098, 0.226, 0.191]
327	211029_25uM_Ecad_cell1_db1b1.npz	[-10.4602 -7.5915 -5.4162]	[0.015, 0.854, 0.225]
328	211029_25uM_Ecad_cell1_db1b1.npz	[-8.1251 -6.5581]	[0.007, 1.031]
329	211029_25uM_Ecad_cell1_db1b1.npz	[-7.2608 -6.9024]	[0.79, 0.199]
330	211029_25uM_Ecad_cell1_db1b1.npz	[7.359 6.3425]	[0.019, 0.04]
331	211029_25uM_Ecad_cell1_db1b1.npz	[9.6286 6.8513]	[0.003, 0.27]
332	211029_25uM_Ecyto_cell6_db4b12.npz	[5.8724 6.9186]	[0.014, 0.038]
333	211029_25uM_Ecyto_cell6_db4b12.npz	[-8.074 -6.8437]	[0.034, 2.811]
334	211029_25uM_Ecyto_cell6_db4b12.npz	[-5.7268 -5.3825]	[2.168, 0.702]
335	211029_25uM_Ecyto_cell6_db4b12.npz	[6.3202 6.1351]	[0.125, 1.221]
336	211029_25uM_Ecyto_cell6_db4b12.npz	[-6.7568 -5.5468]	[0.019, 0.11]
337	211029_25uM_Ecyto_cell6_db4b12.npz	[-7.5819 -5.9779]	[0.013, 0.584]
338	211029_25uM_Ecyto_cell6_db4b12.npz	[-10.227 -8.5881 -7.0112]	[0.02, 0.028, 0.107]
339	211029_25uM_Ecyto_cell6_db4b12.npz	[-9.0079 -7.4633]	[0.049, 0.207]
340	211029_25uM_Ecyto_cell6_db4b12.npz	[-10.3329 -8.2283]	[0.015, 0.045]
341	211029_25uM_Ecyto_cell6_db4b12.npz	[9.5532 8.107 ]	[0.021, 0.253]
342	211029_25uM_Ecyto_cell6_db4b12.npz	[10.3615 11.7197 10.8033 7.9472]	[0.015, 0.078, 0.012, 0.665]
343	211029_25uM_Ecyto_cell6_db4b12.npz	[-8.8057 -8.2038]	[0.014, 0.247]
344	211029_25uM_Ecyto_cell6_db4b12.npz	[8.7477 8.2554]	[0.197, 0.03]
345	211029_25uM_Ecyto_cell6_db4b12.npz	[-9.7094 -7.4205]	[0.032, 0.692]
346	211029_25uM_Ecyto_cell6_db4b12.npz	[-9.7338 -6.3702]	[0.029, 0.015]
347	211029_25uM_Ecyto_cell6_db4b12.npz	[-6.8036 -6.0723]	[0.029, 0.318]
348	211029_25uM_Ecyto_cell6_db4b12.npz	[-9.9436 -7.7108]	[0.012, 0.907]
349	211029_25uM_Ecyto_cell6_db4b12.npz	[10.0445 8.2724]	[0.355, 0.955]
350	211029_25uM_Ecyto_cell6_db4b12.npz	[-9.0097 -6.7759]	[0.098, 3.068]
351	211029_25uM_Ecyto_cell6_db4b12.npz	[-9.8629 -7.6088]	[0.028, 2.236]
352	211029_25uM_Ecyto_cell6_db4b12.npz	[-8.2924 -7.1166]	[4.531, 1.501]
353	211031_25uM_ternarydH1_cell5_db4b7.npz	[-7.3537 -6.6169 -4.6474 -1.5441]	[0.084, 0.4, 1.076, 2.099]
354	211031_25uM_ternarydH1_cell5_db4b7.npz	[10.8798 8.8039 6.2214]	[0.271, 1.952, 0.033]
355	211031_25uM_ternarydH1_cell5_db4b7.npz	[-14.9384 -12.2499 -11.0838]	[0.034, 0.015, 0.022]
356	211031_25uM_ternarydH1_cell5_db4b7.npz	[6.8373 9.3349]	[0.012, 0.225]
357	211031_25uM_ternarydH1_cell5_db4b7.npz	[-15.7232 -8.6 -6.3593 -4.2852 -1.5353]	[0.017, 0.031, 0.015, 0.04, 1.383]
358	211031_25uM_ternarydH1_cell3_db2b6.npz	[-12.6396 -11.0182 -10.7414]	[0.009, 0.256, 0.379]
359	211031_25uM_ternarydH1_cell3_db2b6.npz	[-13.7543 -10.1963]	[0.008, 0.188]
360	211031_25uM_ternarydH1_cell3_db2b6.npz	[-9.4232 -4.396 ]	[0.352, 0.029]
361	211031_25uM_ternarydH1_cell3_db2b6.npz	[8.326 6.6977]	[0.015, 0.156]
362	211031_25uM_ternarydH1_cell3_db2b6.npz	[-11.0725 -10.5983]	[0.204, 0.163]
363	211031_25uM_ternarydH1_cell3_db2b6.npz	[7.2662 6.4119]	[0.025, 0.112]
364	211031_25uM_ternarydH1_cell3_db2b6.npz	[7.9781 6.5386]	[0.044, 0.064]
365	211031_25uM_ternarydH1_cell3_db2b6.npz	[7.6461 6.8963]	[0.015, 0.375]
366	211031_25uM_ternarydH1_cell3_db2b6.npz	[-7.6005 -5.3103 -4.8641]	[0.078, 0.196, 0.28]
367	211031_25uM_ternarydH1_cell3_db2b6.npz	[6.8593 6.5782]	[0.015, 0.155]
368	211031_25uM_ternarydH1_cell3_db2b6.npz	[7.5761 6.7555]	[0.027, 0.15]
369	211031_25uM_ternarydH1_cell3_db2b6.npz	[7.5395 6.4649]	[0.019, 0.08]
370	211031_25uM_ternary_cell1_db1b1.npz	[6.5351 4.6433 3.9461]	[0.143, 2.441, 2.963]
371	211029_25uM_Ecyto_cell6_db4b6.npz	[8.1415 7.7667]	[0.016, 1.851]
372	211029_25uM_Ecyto_cell6_db4b6.npz	[-8.2629 -5.6642]	[0.584, 2.355]
373	211029_25uM_Ecyto_cell6_db4b6.npz	[-11.5121 -8.9274]	[3.096, 1.471]
374	211029_25uM_Ecyto_cell6_db4b6.npz	[8.6084 8.1822 7.5763]	[0.032, 0.021, 0.047]
375	211029_25uM_Ecyto_cell6_db4b6.npz	[5.9496 4.172 ]	[2.555, 0.345]
376	211029_25uM_Ecyto_cell6_db4b6.npz	[8.3697 6.6166 6.1658]	[0.119, 1.571, 0.12]
377	211029_25uM_Ecyto_cell6_db4b6.npz	[7.3952 7.66 ]	[0.029, 0.063]
378	211029_25uM_Ecyto_cell6_db4b6.npz	[9.8038 8.6138]	[0.032, 0.016]
379	211029_25uM_Ecyto_cell6_db4b6.npz	[7.7149 7.7146 7.7384]	[0.135, 0.499, 0.084]
380	211029_25uM_Ecyto_cell6_db4b6.npz	[-9.9315 -9.5368]	[0.075, 1.462]
381	211029_25uM_Ecyto_cell6_db4b6.npz	[-14.6559 -13.6633 -9.6451]	[0.008, 0.019, 0.032]
382	211029_25uM_Ecyto_cell6_db4b6.npz	[6.8571 5.5192]	[1.1, 1.408]
383	211029_25uM_Ecyto_cell6_db4b6.npz	[8.3131 7.0156]	[0.018, 0.078]
384	211114_25uMterndH1_40nmosc_cell2_db1b4.npz	[-2.5586 -1.8772 -0.7338]	[2.649, 6.548, 0.079]
385	211114_25uMterndH1_40nmosc_cell2_db1b4.npz	[3.3462 2.0451 0.8761]	[0.161, 0.344, 0.642]
386	211114_25uMterndH1_40nmosc_cell2_db1b4.npz	[-2.9339 -1.4706 -1.2484]	[2.002, 1.46, 6.992]
387	211114_25uMterndH1_40nmosc_cell2_db1b4.npz	[-2.8871 -1.2356]	[1.106, 5.131]
388	211114_25uMterndH1_40nmosc_cell2_db1b4.npz	[2.9042 1.6973]	[0.771, 5.258]
389	211114_25uMterndH1_40nmosc_cell2_db1b4.npz	[2.6757 2.0833]	[1.647, 1.956]
390	211114_25uMterndH1_40nmosc_cell2_db1b4.npz	[-4.885 -4.276 -3.0593 -1.031 ]	[0.113, 0.737, 0.235, 0.63]
391	211114_25uMterndH1_40nmosc_cell2_db1b4.npz	[2.4613 2.0573 1.1645]	[0.851, 1.093, 1.093]
392	211114_25uMterndH1_40nmosc_cell2_db1b4.npz	[-4.3217 -3.7897 -2.7759 -0.5516]	[0.1, 0.126, 0.203, 3.623]
393	211114_25uMterndH1_40nmosc_cell2_db1b4.npz	[-3.1845 -2.4339 -1.9143 -0.9702]	[0.097, 3.247, 3.884, 9.346]
394	211114_25uMterndH1_40nmosc_cell2_db1b4.npz	[2.7427 1.8063 0.9818]	[0.041, 0.798, 0.708]
395	211114_25uMterndH1_40nmosc_cell2_db1b4.npz	[2.706 2.323 0.8628]	[1.32, 0.337, 2.24]
396	211114_25uMterndH1_40nmosc_cell2_db1b4.npz	[-3.9122 -3.3159 -1.7149 -0.7708]	[0.069, 0.988, 0.89, 5.326]
397	211114_25uMterndH1_40nmosc_cell2_db1b4.npz	[2.9318 2.1196]	[0.246, 0.206]
398	211114_25uMterndH1_40nmosc_cell2_db1b4.npz	[-4.2819 -2.3066]	[0.793, 0.347]
399	211114_25uMterndH1_40nmosc_cell2_db1b4.npz	[-4.9198 -4.2604 -3.1756 -1.7948]	[0.064, 0.351, 0.724, 1.518]
400	211114_25uMterndH1_40nmosc_cell2_db1b4.npz	[3.1456 2.6682 1.8324 1.0314]	[0.511, 0.438, 5.195, 1.471]
401	211031_25uM_ternary_cell1_db2b4.npz	[-9.3407 -8.829 -9.4429]	[0.115, 0.043, 0.889]
402	211031_25uM_ternary_cell1_db2b4.npz	[5.4615 5.1192]	[0.416, 0.057]
403	211031_25uM_ternary_cell1_db2b4.npz	[5.1302 3.7205 4.6658]	[0.026, 0.645, 0.322]
404	211031_25uM_ternary_cell1_db2b4.npz	[5.3068 4.1753 4.5375 4.3769]	[0.982, 0.278, 0.06, 1.498]
405	211031_25uM_ternary_cell1_db2b4.npz	[5.6616 5.438 ]	[0.122, 0.653]
406	211031_25uM_ternary_cell1_db2b4.npz	[5.4364 2.767 ]	[0.324, 0.964]
407	211031_25uM_ternary_cell1_db2b4.npz	[-8.9499 -8.6656]	[0.69, 1.086]
408	211031_25uM_ternary_cell1_db2b4.npz	[5.5573 3.8534]	[0.09, 0.079]
409	211031_25uM_ternary_cell1_db2b4.npz	[-7.7251 -7.324 -7.1718]	[1.04, 1.646, 7.718]
410	211031_25uM_ternary_cell1_db2b4.npz	[-9.4314 -8.9732]	[0.19, 0.482]
411	211031_25uM_ternary_cell1_db2b4.npz	[6.3011 4.8823]	[0.166, 0.108]
412	211031_25uM_ternary_cell1_db2b4.npz	[5.4788 4.0871]	[0.095, 0.416]
413	211031_25uM_ternary_cell1_db2b4.npz	[-8.5447 -6.3609]	[0.546, 0.246]
414	211031_25uM_ternary_cell1_db2b4.npz	[5.765 4.8166 3.8443 4.4959]	[0.391, 0.917, 0.029, 1.496]
415	211029_25uM_Ecad_cell2_db4b6d.npz	[6.0011 4.7381 5.8513]	[0.065, 0.296, 0.089]
416	211029_25uM_Ecad_cell2_db4b6d.npz	[5.3949 4.3422 5.4203 4.2699 5.2755 4.3476 5.2942 4.3128]	[0.088, 0.321, 0.211, 0.179, 0.592, 0.049, 0.643, 0.553]
417	211029_25uM_Ecad_cell2_db4b6d.npz	[5.9018 4.5473]	[0.281, 0.428]
418	211029_25uM_Ecad_cell2_db4b6d.npz	[-8.6248 -7.0475]	[0.012, 0.163]
419	211029_25uM_Ecad_cell2_db4b6d.npz	[-8.9788 -7.0788]	[0.014, 0.706]
420	211029_25uM_Ecad_cell2_db4b6d.npz	[4.4034 3.8514 4.3898]	[0.043, 0.209, 0.093]
421	211029_25uM_Ecad_cell2_db4b6d.npz	[5.007 4.0806]	[0.164, 0.202]
422	211029_25uM_Ecad_cell2_db4b6d.npz	[-7.9912 -6.9943]	[0.027, 1.597]
423	211029_25uM_Ecad_cell2_db4b6d.npz	[-9.0049 -6.958 ]	[0.007, 0.066]
424	211029_25uM_Ecad_cell2_db4b6d.npz	[-8.2419 -6.0045]	[0.028, 3.697]
425	211029_25uM_Ecad_cell2_db4b6d.npz	[2.6052 3.9074 5.0027]	[0.017, 0.089, 1.627]
426	211029_25uM_Ecad_cell2_db4b6d.npz	[-7.2125 -6.075 ]	[0.012, 0.226]
427	211029_25uM_Ecad_cell2_db4b6d.npz	[-6.8436 -5.1901]	[0.089, 0.322]
428	211029_25uM_Ecad_cell2_db4b6d.npz	[4.1121 4.002 ]	[0.051, 0.045]
429	211029_25uM_Ecad_cell2_db4b6d.npz	[-8.2765 -6.0842]	[0.018, 0.218]
430	211029_25uM_Ecad_cell2_db4b6d.npz	[3.1741 2.85 ]	[0.166, 0.258]
431	211029_25uM_Ecad_cell2_db4b6d.npz	[-8.433 -6.7634]	[0.018, 1.018]
432	211029_25uM_Ecad_cell2_db4b6d.npz	[-9.6307 -8.4849]	[0.015, 0.607]
433	211029_25uM_Ecad_cell2_db4b6d.npz	[-8.4646 -6.534 ]	[0.036, 0.16]
434	211029_25uM_Ecad_cell2_db4b6d.npz	[6.1696 4.5 ]	[0.227, 0.086]
435	211029_25uM_Ecad_cell2_db4b6d.npz	[6.2781 4.7929]	[0.424, 0.69]
436	211029_25uM_Ecad_cell2_db4b6d.npz	[-8.4181 -6.2075]	[0.058, 0.057]
437	211029_25uM_Ecad_cell2_db4b6d.npz	[4.4019 3.9765]	[0.979, 0.269]
438	211029_25uM_Ecad_cell2_db4b6d.npz	[-9.5443 -7.1057]	[0.041, 0.664]
439	211029_25uM_Ecad_cell2_db4b6d.npz	[-8.2224 -8.2615]	[0.459, 0.954]
440	211029_25uM_Ecad_cell2_db4b6d.npz	[-7.7254 -7.5569]	[1.44, 1.163]
441	211031_25uM_ternarydH1_cell4_db3b5.npz	[-10.9341 -8.1096]	[0.02, 0.138]
442	211114_25uMterndH1_40nmosc_cell2_db1b3.npz	[2.7126 1.4442]	[0.086, 0.226]
443	211114_25uMterndH1_40nmosc_cell2_db1b3.npz	[3.1099 2.7793]	[0.392, 1.189]
444	211114_25uMterndH1_40nmosc_cell2_db1b3.npz	[-3.083 -3.7309 -2.9054 -4.0886]	[0.148, 0.023, 0.551, 0.203]
445	211114_25uMterndH1_40nmosc_cell2_db1b3.npz	[-2.9946 -3.0451]	[0.017, 0.586]
446	211114_25uMterndH1_40nmosc_cell2_db1b3.npz	[3.4208 2.6613 3.3987 3.3413]	[0.117, 0.425, 2.754, 1.787]
447	211113_25uM_ternarydH1_cell4_db1b1.npz	[4.7906 4.1951]	[0.074, 0.182]
448	211113_25uM_ternarydH1_cell4_db1b1.npz	[-3.1834 -2.8265]	[1.783, 0.393]
449	211113_25uM_ternarydH1_cell4_db1b1.npz	[-4.3002 -3.8988]	[0.979, 2.29]
450	211113_25uM_ternarydH1_cell4_db1b1.npz	[-3.1362 -2.7466 -2.475 ]	[0.36, 0.748, 1.283]
451	211113_25uM_ternarydH1_cell4_db1b1.npz	[4.2885 4.0554]	[0.243, 0.115]
452	211113_25uM_ternarydH1_cell4_db1b1.npz	[-4.2087 -3.6631]	[1.633, 0.139]
453	211113_25uM_ternarydH1_cell4_db1b1.npz	[-3.1653 -2.7083]	[0.499, 4.444]
454	211113_25uM_ternarydH1_cell4_db1b1.npz	[-2.5361 -2.2293]	[1.198, 0.98]
455	211030_ternarydH1_cell3_db3b3.npz	[-12.585 -9.6973]	[0.007, 0.297]
456	211030_ternarydH1_cell3_db3b3.npz	[8.9388 7.1587]	[0.013, 0.005]
457	211030_ternarydH1_cell3_db3b3.npz	[-11.9524 -10.7958 -8.754 ]	[0.07, 0.028, 0.614]
458	211030_ternarydH1_cell3_db3b3.npz	[-12.8572 -12.5682 -9.8879]	[0.035, 0.098, 1.269]
459	211030_ternarydH1_cell3_db3b3.npz	[7.1804 6.7534]	[0.203, 4.219]
460	211030_ternarydH1_cell3_db3b3.npz	[9.5487 7.9981]	[0.013, 0.273]
461	211030_ternarydH1_cell3_db3b3.npz	[5.5928 6.7931 6.4978]	[0.01, 0.032, 0.939]
462	211030_ternarydH1_cell3_db3b3.npz	[8.4923 7.3855]	[0.029, 0.302]
463	211030_ternarydH1_cell3_db3b3.npz	[8.8707 6.6955]	[0.008, 0.553]
464	211030_ternarydH1_cell3_db3b3.npz	[-12.3166 -8.7371]	[0.156, 4.466]
465	211030_ternarydH1_cell3_db3b3.npz	[-13.2242 -11.0211]	[0.081, 0.198]
466	211030_ternarydH1_cell3_db3b3.npz	[-11.3085 -11.1531]	[0.118, 0.46]
467	211113_25uM_ternarydH1_cell3_db4b12.npz	[4.1004 3.9395]	[0.128, 0.21]
468	211113_25uM_ternarydH1_cell3_db4b12.npz	[2.8457 2.1783]	[0.118, 0.1]
469	211113_25uM_ternarydH1_cell3_db4b12.npz	[-3.7401 -5.1267]	[0.099, 0.085]
470	211113_25uM_ternarydH1_cell3_db4b12.npz	[-5.3775 -4.8146]	[0.051, 0.172]
471	211113_25uM_ternarydH1_cell3_db4b12.npz	[-4.8599 -4.6149]	[0.028, 0.188]
472	211113_25uM_ternarydH1_cell3_db4b12.npz	[-5.9502 -5.2236]	[0.36, 0.202]
473	211113_25uM_ternarydH1_cell3_db4b12.npz	[2.9759 2.9485]	[0.237, 0.171]
474	211113_25uM_ternarydH1_cell3_db4b12.npz	[-4.3673 -4.283 ]	[0.059, 0.125]
475	211113_25uM_ternarydH1_cell3_db4b12.npz	[4.2335 3.9323]	[0.051, 0.093]
476	211113_25uM_ternarydH1_cell3_db4b12.npz	[-5.5034 -3.5246]	[0.075, 0.3]
477	211113_25uM_ternarydH1_cell3_db4b12.npz	[4.3797 4.1285]	[0.03, 0.18]
478	211113_25uM_ternarydH1_cell3_db4b12.npz	[4.8025 4.6927 4.604 ]	[0.064, 0.106, 0.14]
479	211113_25uM_ternarydH1_cell3_db4b12.npz	[-7.3768 -5.2468]	[0.144, 0.08]
480	211113_25uM_ternarydH1_cell3_db4b12.npz	[3.442 3.3218]	[0.141, 0.102]
481	211113_25uM_ternarydH1_cell3_db4b12.npz	[-5.3565 -3.8729 -5.4092 -3.6174 -5.2429]	[0.246, 0.104, 0.295, 0.202, 0.435]
482	211113_25uM_ternarydH1_cell3_db4b12.npz	[-4.8182 -4.7571]	[0.023, 0.047]
483	211113_25uM_ternarydH1_cell3_db4b12.npz	[-4.7071 -3.3159]	[0.51, 0.279]
484	211113_25uM_ternarydH1_cell3_db4b12.npz	[-6.809 -6.2024]	[0.052, 0.359]
485	211113_25uM_ternarydH1_cell3_db4b12.npz	[-5.6862 -5.209 ]	[0.1, 0.423]
486	211113_25uM_ternarydH1_cell3_db4b12.npz	[3.5099 3.1945]	[0.087, 0.04]
487	211113_25uM_ternarydH1_cell3_db4b12.npz	[-3.7699 -4.6395]	[0.055, 0.102]
488	211113_25uM_ternarydH1_cell3_db4b12.npz	[-6.2555 -5.8619]	[0.074, 0.086]
489	211029_25uM_Ecyto_cell6_db4b10.npz	[-10.3218 -7.6703]	[0.012, 4.205]
490	211029_25uM_Ecyto_cell6_db4b10.npz	[-10.4158 -8.1674]	[0.497, 1.551]
491	211029_25uM_Ecyto_cell6_db4b10.npz	[11.725 9.6264]	[0.008, 0.092]
492	211029_25uM_Ecyto_cell6_db4b10.npz	[-11.4775 -9.3154]	[0.292, 1.46]
493	211029_25uM_Ecyto_cell6_db4b10.npz	[-9.7865 -9.1951 -8.0253]	[1.721, 0.518, 2.803]
494	211029_25uM_Ecyto_cell6_db4b10.npz	[-11.2128 -9.4858 -7.7043]	[0.006, 0.095, 0.407]
495	211029_25uM_Ecyto_cell6_db4b10.npz	[8.9385 6.9992]	[0.264, 2.292]
496	211029_25uM_Ecyto_cell6_db4b10.npz	[-8.5539 -8.3052]	[0.998, 1.202]
497	211030_ternarydH1_cell2_db4b8.npz	[-4.7117 -3.63 -3.3175 -1.7373]	[2.023, 1.331, 0.066, 0.273]
498	211030_ternarydH1_cell2_db4b8.npz	[-10.7097 -9.3918 -6.7381]	[0.017, 0.029, 0.511]
499	211030_ternarydH1_cell2_db4b8.npz	[8.3834 7.2997 6.5087]	[0.05, 0.069, 3.783]
500	211030_ternarydH1_cell2_db4b8.npz	[-12.1888 -9.2426]	[0.009, 0.009]
501	211030_ternarydH1_cell2_db4b8.npz	[8.0492 8.5609 6.3908 6.4468]	[0.01, 0.018, 0.237, 2.034]
502	211030_ternarydH1_cell2_db4b8.npz	[-9.3921 -8.7125 -8.3606]	[0.07, 0.593, 0.355]
503	211030_ternarydH1_cell2_db4b8.npz	[-13.8342 -10.2827]	[0.007, 0.337]
504	211030_ternarydH1_cell2_db4b8.npz	[8.0634 7.183 5.7255]	[0.046, 0.077, 2.575]
505	211030_ternarydH1_cell2_db4b8.npz	[8.8877 6.8089]	[0.038, 5.03]
506	211029_25uM_Ecad_cell1_db3b6.npz	[-8.6307 -7.0686]	[0.008, 0.209]
507	211029_25uM_Ecad_cell1_db3b6.npz	[8.0536 6.5147]	[0.005, 0.84]
508	211029_25uM_Ecad_cell1_db3b6.npz	[-7.8333 -6.369 -6.2255]	[0.017, 0.064, 0.363]
509	211029_25uM_Ecad_cell1_db3b6.npz	[-8.355 -6.5484 -6.0944]	[0.022, 0.236, 0.365]
510	211029_25uM_Ecad_cell1_db3b6.npz	[8.3229 7.9205 7.2112]	[0.25, 0.145, 0.043]
511	211029_25uM_Ecad_cell1_db3b6.npz	[8.2328 7.8725]	[0.072, 0.615]
512	211029_25uM_Ecad_cell1_db3b6.npz	[8.1232 5.7562 5.3385]	[0.005, 0.178, 0.14]
513	211029_25uM_Ecad_cell1_db3b6.npz	[8.8336 6.5231]	[0.017, 1.756]
514	211029_25uM_Ecad_cell1_db3b6.npz	[-7.7655 -5.8025]	[0.075, 1.623]
515	211029_25uM_Ecad_cell1_db3b6.npz	[9.5788 7.1008]	[0.01, 0.05]
516	211029_25uM_Ecad_cell1_db3b6.npz	[-8.7102 -6.6846]	[0.006, 0.609]
517	211029_25uM_Ecyto_cell6_db4b6b.npz	[-12.2934 -9.2764]	[0.045, 0.805]
518	211029_25uM_Ecyto_cell6_db4b6b.npz	[-10.9278 -9.9012 -9.9388]	[0.104, 1.193, 1.087]
519	211029_25uM_Ecyto_cell6_db4b6b.npz	[-9.6546 -3.3806]	[1.003, 3.758]
520	211029_25uM_Ecyto_cell6_db4b6b.npz	[9.6416 7.3805]	[0.035, 0.395]
521	211029_25uM_Ecyto_cell6_db4b6b.npz	[-11.9076 -8.5718]	[0.034, 0.404]
522	211029_25uM_Ecyto_cell6_db4b6b.npz	[9.2497 6.3815]	[0.085, 0.049]
523	211029_25uM_Ecyto_cell6_db4b6b.npz	[8.5987 8.4234 8.3223]	[0.193, 2.382, 0.308]
524	211029_25uM_Ecyto_cell6_db4b6b.npz	[-9.4626 -8.6163 -7.6214 -5.9403]	[0.014, 0.166, 0.703, 2.262]
525	211029_25uM_Ecyto_cell6_db4b6b.npz	[9.884 7.6847]	[0.027, 0.202]
526	211029_25uM_Ecyto_cell6_db4b6b.npz	[7.6805 5.6464]	[0.085, 0.32]
527	211029_25uM_Ecyto_cell6_db4b6b.npz	[-9.9296 -4.2037]	[0.008, 0.377]
528	211029_25uM_Ecyto_cell6_db4b6b.npz	[7.4911 5.7156]	[0.353, 0.113]
529	211029_25uM_Ecyto_cell6_db4b6b.npz	[7.5814 5.536 ]	[0.06, 1.288]
530	211029_25uM_Ecyto_cell6_db4b6b.npz	[-11.0107 -8.8571]	[0.015, 0.942]
531	211029_25uM_Ecyto_cell6_db4b12.npz	[-9.3554 -8.25 -8.1868]	[0.009, 0.665, 1.487]
532	211029_25uM_Ecyto_cell6_db4b12.npz	[7.8931 7.1302]	[0.846, 5.291]
533	211029_25uM_Ecyto_cell6_db4b12.npz	[-8.0352 -7.8784]	[0.314, 0.236]
534	211029_25uM_Ecyto_cell6_db4b12.npz	[-10.6453 -7.7393 -7.3318]	[0.011, 0.339, 0.376]
535	211029_25uM_Ecyto_cell6_db4b12.npz	[7.8029 7.3369]	[0.376, 0.034]
536	211029_25uM_Ecyto_cell6_db4b12.npz	[7.0004 6.1727]	[0.852, 0.055]
537	211029_25uM_Ecyto_cell6_db4b12.npz	[-10.3221 -7.7026]	[0.019, 1.27]
538	211029_25uM_Ecyto_cell6_db4b12.npz	[-9.8823 -7.3524]	[0.031, 0.19]
539	211029_25uM_Ecyto_cell6_db4b12.npz	[8.1911 8.3333]	[1.859, 0.869]
540	211029_25uM_Ecyto_cell6_db4b12.npz	[7.7143 7.4495]	[0.354, 0.081]
541	211029_25uM_Ecyto_cell6_db4b12.npz	[-9.7559 -7.83 -7.0171]	[0.01, 0.786, 1.677]
542	211029_25uM_Ecyto_cell6_db4b12.npz	[6.5428 7.4835 5.5228 4.438 ]	[0.096, 1.471, 2.912, 4.326]
543	211029_25uM_Ecyto_cell6_db4b12.npz	[-9.3213 -7.9811 -5.4098 -3.1575]	[0.01, 0.02, 0.046, 0.576]
544	211029_25uM_Ecyto_cell6_db4b12.npz	[7.0648 6.0217]	[0.01, 4.474]
545	211029_25uM_Ecyto_cell6_db4b12.npz	[6.1215 5.9838]	[0.536, 2.419]
546	211029_25uM_Ecyto_cell6_db4b12.npz	[-6.148 -2.332]	[0.071, 0.114]
547	211113_25uM_ternarydH1_cell3_db2b4.npz	[2.9574 2.7847]	[0.576, 1.836]
548	211113_25uM_ternarydH1_cell3_db2b4.npz	[-3.7122 -2.9021]	[0.12, 1.838]
549	211113_25uM_ternarydH1_cell3_db2b4.npz	[-2.4244 -2.172 ]	[0.617, 2.549]
550	211113_25uM_ternarydH1_cell3_db2b4.npz	[-4.3908 -4.1595]	[0.16, 0.819]
551	211113_25uM_ternarydH1_cell3_db2b4.npz	[2.2403 0.993 ]	[0.65, 3.664]
552	211113_25uM_ternarydH1_cell3_db2b4.npz	[-4.0447 -3.8127 -4.8499]	[0.025, 0.507, 0.581]
553	211113_25uM_ternarydH1_cell3_db2b4.npz	[2.8618 2.3948]	[0.548, 0.157]
554	211113_25uM_ternarydH1_cell3_db2b4.npz	[3.1408 3.8556 2.9057 4.1801]	[0.093, 0.329, 0.311, 1.815]
555	211113_25uM_ternarydH1_cell3_db2b4.npz	[1.9887 0.8539]	[2.902, 0.392]
556	211113_25uM_ternarydH1_cell3_db2b4.npz	[-3.1012 -2.8287]	[0.467, 0.074]
557	211113_25uM_ternarydH1_cell3_db2b4.npz	[3.1809 2.8236]	[0.206, 0.245]
558	211113_25uM_ternarydH1_cell3_db2b4.npz	[-2.4468 -2.3247]	[2.836, 4.441]
559	211113_25uM_ternarydH1_cell3_db2b4.npz	[-3.5832 -3.0925]	[2.769, 0.711]
560	211113_25uM_ternarydH1_cell3_db2b4.npz	[-3.8709 -3.7274]	[1.083, 1.08]
561	211113_25uM_ternarydH1_cell3_db2b4.npz	[-3.412 -3.2236]	[0.467, 1.47]
562	211113_25uM_ternarydH1_cell3_db2b4.npz	[3.0619 2.619 ]	[0.437, 0.444]
563	211113_25uM_ternarydH1_cell3_db2b4.npz	[3.1966 2.9275]	[0.438, 0.134]
564	211113_25uM_ternarydH1_cell3_db2b4.npz	[3.1447 3.0468]	[0.414, 0.751]
565	211031_25uM_ternary_cell1_db3b6.npz	[8.7314 6.6599 6.6029 4.4594]	[0.193, 0.078, 3.063, 0.137]
566	211031_25uM_ternary_cell1_db3b6.npz	[7.0301 5.8052]	[0.021, 0.143]
567	211031_25uM_ternary_cell1_db3b6.npz	[9.594 7.0672]	[0.024, 0.06]
568	211031_25uM_ternary_cell1_db3b6.npz	[8.6867 6.7256]	[0.012, 0.409]
569	211031_25uM_ternary_cell1_db3b6.npz	[8.6194 8.0462]	[0.191, 0.782]
570	211031_25uM_ternary_cell1_db3b6.npz	[9.167 7.5534 7.4036 7.393 ]	[0.02, 0.429, 1.244, 0.662]
571	211031_25uM_ternary_cell1_db3b6.npz	[-8.0884 -5.3521 -4.9092]	[0.012, 1.116, 4.03]
572	211031_25uM_ternary_cell1_db3b6.npz	[-6.0327 -4.9607 -5.9001]	[0.873, 0.729, 0.496]
573	211031_25uM_ternary_cell1_db3b6.npz	[9.1589 7.04 ]	[0.016, 2.358]
574	211031_25uM_ternary_cell1_db3b6.npz	[-6.2274 -4.7498 -5.3003]	[0.339, 0.362, 1.795]
575	211031_25uM_ternary_cell1_db3b6.npz	[-7.1846 -6.2418]	[0.026, 0.06]
576	211031_25uM_ternary_cell1_db3b6.npz	[10.0495 7.0086]	[0.015, 0.318]
577	211031_25uM_ternary_cell1_db3b6.npz	[-6.5076 -6.1524 -4.5691]	[0.297, 0.905, 0.204]
578	211031_25uM_ternary_cell1_db3b6.npz	[10.1132 9.5706 8.2169]	[0.143, 0.092, 0.388]
579	211031_25uM_ternary_cell1_db3b6.npz	[-7.7564 -7.2246 -5.341 -5.0877 -4.6258 -5.7943 -4.6813 -3.5739]	[0.063, 0.278, 2.146, 3.454, 1.318, 0.185, 0.788, 0.102]
580	211029_25uM_Ecyto_cell6_db4b10.npz	[-6.4184 -4.5758 -6.1062 -4.5015]	[0.537, 0.627, 0.791, 0.209]
581	211029_25uM_Ecyto_cell6_db4b10.npz	[8.3688 8.0346]	[0.455, 1.176]
582	211029_25uM_Ecyto_cell6_db4b10.npz	[-10.2562 -9.1342 -9.5046 -7.4959]	[1.173, 0.207, 0.491, 1.119]
583	211029_25uM_Ecyto_cell6_db4b10.npz	[7.9322 7.9799 7.7527]	[0.056, 0.115, 0.142]
584	211029_25uM_Ecyto_cell6_db4b10.npz	[8.6273 7.4233]	[0.053, 0.213]
585	211029_25uM_Ecyto_cell6_db4b10.npz	[-12.2901 -11.1226 -9.6558]	[0.027, 0.18, 0.226]
586	211029_25uM_Ecyto_cell6_db4b10.npz	[8.8903 8.4435]	[0.108, 0.202]
587	211029_25uM_Ecyto_cell6_db4b10.npz	[7.9858 8.2692]	[0.121, 0.029]
588	211029_25uM_Ecyto_cell6_db4b10.npz	[-11.6616 -9.4171 -7.5716]	[0.087, 0.009, 0.056]
589	211029_25uM_Ecyto_cell6_db4b10.npz	[-9.6086 -8.0173]	[0.123, 0.028]
590	211029_25uM_Ecyto_cell6_db4b10.npz	[-9.7772 -9.1899]	[0.024, 0.128]
591	211029_25uM_Ecyto_cell6_db4b10.npz	[-10.0612 -9.0956 -7.6637]	[0.023, 0.702, 0.932]
592	211029_25uM_Ecyto_cell6_db4b10.npz	[7.2823 6.3357]	[0.674, 3.308]
593	211029_25uM_Ecyto_cell6_db4b10.npz	[-9.1055 -8.053 -7.4159 -4.5684 -4.083 -1.9266]	[0.066, 0.972, 1.065, 0.384, 0.593, 5.192]
594	211029_25uM_Ecyto_cell6_db4b10.npz	[-9.4363 -8.0841]	[0.584, 0.945]
595	211029_25uM_Ecyto_cell6_db4b10.npz	[7.4194 8.4904 6.44 ]	[0.009, 0.079, 0.226]
596	211029_25uM_Ecyto_cell6_db4b10.npz	[9.4924 6.9711 5.5578]	[0.026, 2.242, 0.371]
597	211029_25uM_Ecyto_cell6_db4b10.npz	[-9.1359 -7.0694 -6.1002]	[0.35, 1.557, 3.049]
598	211031_25uM_ternary_cell1_db3b9.npz	[11.4522 9.8225]	[0.041, 2.322]
599	211031_25uM_ternary_cell1_db3b9.npz	[10.3747 8.7426]	[0.031, 0.031]
600	211031_25uM_ternary_cell1_db3b9.npz	[7.581 7.2005]	[2.06, 0.663]
601	211031_25uM_ternary_cell1_db3b9.npz	[-8.2256 -6.1226]	[0.066, 1.895]
602	211031_25uM_ternary_cell1_db3b9.npz	[8.9672 7.1449 7.1888 7.2498]	[0.015, 0.358, 0.701, 0.231]
603	211031_25uM_ternary_cell1_db3b9.npz	[-7.454 -7.2227 -7.2961]	[0.096, 0.337, 1.726]
604	211031_25uM_ternary_cell1_db3b9.npz	[11.8365 10.3592]	[0.024, 0.363]
605	211031_25uM_ternary_cell1_db3b9.npz	[10.2855 9.8975 10.1144]	[0.104, 0.063, 0.102]
606	211031_25uM_ternary_cell1_db3b9.npz	[7.4043 7.293 7.1294]	[0.061, 0.091, 0.39]
607	211031_25uM_ternary_cell1_db3b9.npz	[-7.9668 -7.1704 -5.8505 -5.7864]	[0.046, 0.111, 0.842, 0.52]
608	211031_25uM_ternary_cell1_db3b9.npz	[7.5345 5.8641 1.2389]	[4.444, 0.974, 13.029]
609	211031_25uM_ternary_cell1_db3b9.npz	[11.1049 8.6168]	[0.012, 0.778]
610	211031_25uM_ternary_cell1_db3b9.npz	[-8.4057 -6.0673]	[0.069, 4.629]
611	211031_25uM_ternary_cell1_db3b9.npz	[-9.1536 -6.894 ]	[0.009, 1.573]
612	211031_25uM_ternary_cell1_db3b9.npz	[11.0442 8.9155 7.2849]	[0.017, 1.375, 0.42]
613	211031_25uM_ternary_cell1_db3b9.npz	[-7.3711 -7.285 ]	[0.362, 0.328]
614	211030_ternarydH1_cell2_db6b10.npz	[-3.4343 -3.1368 -2.2094]	[0.128, 0.636, 4.926]
615	211030_ternarydH1_cell2_db6b10.npz	[-3.2999 -1.6944]	[0.038, 15.692]
616	211031_25uM_ternarydH1_cell5_db1b1.npz	[-10.9521 -7.583 ]	[0.191, 0.244]
617	211031_25uM_ternarydH1_cell5_db1b1.npz	[-12.7918 -8.8286]	[0.026, 0.451]
618	211031_25uM_ternarydH1_cell5_db1b1.npz	[8.8259 8.9339 8.4335]	[0.029, 0.086, 0.061]
619	211031_25uM_ternarydH1_cell5_db1b1.npz	[9.5009 7.0045]	[0.02, 0.196]
620	211031_25uM_ternarydH1_cell5_db1b1.npz	[4.0073 4.2013]	[0.061, 0.025]
621	211031_25uM_ternary_cell1_db3b9.npz	[9.4741 6.5435]	[0.02, 2.355]
622	211031_25uM_ternary_cell1_db3b9.npz	[-8.7581 -6.2947]	[0.012, 0.112]
623	211031_25uM_ternary_cell1_db3b9.npz	[10.098 7.4368 6.3329]	[0.014, 1.521, 0.115]
624	211031_25uM_ternary_cell1_db3b9.npz	[-10.1 -6.0191 -2.8613 -1.5626]	[0.023, 1.663, 0.31, 0.651]
625	211031_25uM_ternary_cell1_db3b9.npz	[9.2477 1.5431]	[0.472, 1.021]
626	211031_25uM_ternary_cell1_db3b9.npz	[9.8621 1.7396]	[0.245, 1.58]
627	211031_25uM_ternary_cell1_db3b9.npz	[-10.0878 -7.567 -7.4366 -3.5135 -1.6275]	[0.032, 0.653, 0.569, 3.562, 0.913]
628	211031_25uM_ternary_cell1_db3b9.npz	[13.3042 11.193 8.1959 6.0371 2.172 ]	[0.014, 0.063, 0.022, 0.526, 4.136]
629	211031_25uM_ternary_cell1_db3b9.npz	[-11.4629 -9.5479 -6.8425 -5.6232 -3.4862]	[0.019, 0.592, 0.755, 0.689, 0.055]
630	211031_25uM_ternary_cell1_db3b9.npz	[9.3296 8.722 9.3204]	[0.321, 0.028, 0.344]
631	211031_25uM_ternary_cell1_db3b9.npz	[-7.8114 -6.8966 -6.9297]	[0.015, 0.045, 0.085]
632	211031_25uM_ternary_cell1_db3b9.npz	[9.3108 7.6192]	[0.499, 0.311]
633	211031_25uM_ternary_cell1_db3b9.npz	[10.7523 10.1089 8.5248 2.4182 1.1556]	[0.174, 0.066, 0.145, 1.211, 2.296]
634	211031_25uM_ternary_cell1_db3b9.npz	[-9.257 -7.3529]	[0.067, 0.121]
635	211031_25uM_ternary_cell1_db3b9.npz	[13.1514 10.8744 8.3267 5.3303 3.6873]	[0.182, 0.004, 1.22, 0.849, 0.16]
636	211031_25uM_ternary_cell1_db3b9.npz	[11.9913 10.874 ]	[0.149, 0.13]
637	211031_25uM_ternary_cell1_db3b9.npz	[-14.1105 -11.728 -9.5024 -5.351 -4.8118]	[0.017, 0.362, 0.64, 0.118, 0.086]
638	211031_25uM_ternary_cell1_db3b9.npz	[9.527 8.578]	[0.093, 0.04]
639	211031_25uM_ternary_cell1_db3b9.npz	[-10.0668 -8.5402 -5.495 -3.0485]	[0.041, 0.516, 0.161, 0.086]
640	211031_25uM_ternary_cell1_db3b9.npz	[-8.2976 -7.9398]	[0.019, 0.271]
641	211031_25uM_ternary_cell1_db3b7.npz	[-8.9891 -7.7386 -7.2018]	[0.01, 0.203, 0.164]
642	211031_25uM_ternary_cell1_db3b7.npz	[11.1459 10.3409]	[0.034, 0.088]
643	211031_25uM_ternary_cell1_db3b7.npz	[-8.1816 -5.9811]	[0.727, 1.987]
644	211031_25uM_ternary_cell1_db3b7.npz	[-8.1374 -5.8216]	[0.015, 0.012]
645	211031_25uM_ternary_cell1_db3b7.npz	[-8.2398 -6.3602]	[0.295, 5.979]
646	211031_25uM_ternary_cell1_db3b7.npz	[-8.0596 -7.628 -7.4907]	[2.609, 8.025, 1.29]
647	211031_25uM_ternary_cell1_db3b7.npz	[10.0993 9.5974 9.4532 9.0023]	[0.286, 0.255, 0.297, 0.117]
648	211031_25uM_ternary_cell1_db3b7.npz	[-7.6207 -7.3752]	[4.227, 2.092]
649	211031_25uM_ternary_cell1_db3b7.npz	[9.0674 8.5002]	[0.173, 0.577]
650	211031_25uM_ternary_cell1_db3b7.npz	[-8.7068 -3.4454]	[0.048, 0.014]
651	211031_25uM_ternary_cell1_db3b7.npz	[9.5348 7.9126 2.2001]	[0.066, 1.245, 0.284]
652	211031_25uM_ternary_cell1_db3b7.npz	[-7.0626 -5.1383 -6.8006 -4.9257 -6.1369 -4.7469]	[0.141, 17.097, 0.228, 4.295, 1.777, 0.472]
653	211031_25uM_ternary_cell1_db3b7.npz	[10.0801 8.5966 5.5325]	[0.107, 1.985, 4.534]
654	211031_25uM_ternary_cell1_db3b7.npz	[-8.1546 -6.216 -6.5069]	[0.049, 0.549, 1.172]
655	211031_25uM_ternary_cell1_db3b7.npz	[-8.0511 -5.9896 -5.8471]	[0.12, 0.167, 1.778]
656	211031_25uM_ternary_cell1_db3b7.npz	[-9.816 -7.391]	[0.019, 0.449]
657	211029_25uM_Ecyto_cell6_db4b6b.npz	[-10.2987 -8.0282]	[0.04, 1.992]
658	211029_25uM_Ecyto_cell6_db4b6b.npz	[6.8417 5.1146]	[0.149, 1.187]
659	211029_25uM_Ecyto_cell6_db4b6b.npz	[8.7404 6.6199]	[0.065, 6.476]
660	211029_25uM_Ecyto_cell6_db4b6b.npz	[-10.1396 -8.2695]	[0.974, 6.938]
661	211029_25uM_Ecyto_cell6_db4b6b.npz	[-10.5819 -9.1844]	[0.194, 0.023]
662	211029_25uM_Ecyto_cell6_db4b6b.npz	[-9.9127 -9.7754 -9.3404]	[0.286, 1.578, 2.037]
663	211029_25uM_Ecyto_cell6_db4b6b.npz	[-11.1857 -9.5984]	[0.022, 1.118]
664	211029_25uM_Ecyto_cell6_db4b6b.npz	[-12.3053 -8.5636]	[0.054, 1.771]
665	211029_25uM_Ecyto_cell6_db4b6b.npz	[-10.8424 -8.8984]	[0.024, 0.173]
666	211029_25uM_Ecyto_cell6_db4b6b.npz	[-11.9752 -8.8099]	[0.052, 0.011]
667	211029_25uM_Ecyto_cell6_db4b6b.npz	[-10.3406 -8.6054]	[0.018, 1.014]
668	211029_25uM_Ecyto_cell6_db4b6b.npz	[8.2441 6.5094]	[0.029, 1.117]
669	211029_25uM_Ecyto_cell6_db4b6b.npz	[7.3053 7.1827]	[0.202, 0.151]
670	211029_25uM_Ecyto_cell6_db4b6b.npz	[-9.2248 -8.7899]	[0.102, 0.069]
671	211029_25uM_Ecyto_cell6_db4b6b.npz	[5.6839 4.6361]	[0.046, 1.751]
672	211029_25uM_Ecyto_cell6_db4b6b.npz	[5.4553 4.2546 3.3799 4.0375 3.4931 4.3799 3.5357 4.3171 3.4717 4.3693 3.334 4.1133 3.5672 4.3388 3.4087 4.5056 3.559 4.7294 4.0395 4.5114 3.6213 4.5775 3.8368 4.9588 4.0573 5.0829 4.1006]	[0.045, 1.896, 0.237, 0.319, 0.094, 0.451, 1.21, 0.211, 0.404, 0.105, 0.187, 0.07, 2.256, 0.314, 0.11, 0.152, 1.283, 2.858, 0.185, 1.59, 2.721, 0.4, 0.712, 8.839, 12.42, 0.248, 4.451]
673	211029_25uM_Ecyto_cell6_db4b6b.npz	[-10.7482 -6.836 ]	[0.021, 2.562]
674	211029_25uM_Ecyto_cell6_db4b6b.npz	[-8.3096 -8.045 ]	[1.387, 1.622]
675	211029_25uM_Ecyto_cell6_db4b6b.npz	[5.174 4.2547]	[0.028, 1.4]
676	211029_25uM_Ecad_cell2_db4b6.npz	[9.2284 8.7788]	[0.214, 0.148]
677	211029_25uM_Ecad_cell2_db4b6.npz	[-11.1321 -8.3832]	[0.018, 0.498]
678	211029_25uM_Ecad_cell2_db4b6.npz	[9.3273 9.8515 7.2776]	[0.008, 0.066, 0.71]
679	211029_25uM_Ecad_cell2_db4b6.npz	[-9.2921 -8.5494]	[0.479, 1.827]
680	211029_25uM_Ecad_cell2_db4b6.npz	[9.296 7.5798]	[0.029, 0.845]
681	211029_25uM_Ecad_cell2_db4b6.npz	[9.9115 7.4246]	[0.043, 1.002]
682	211029_25uM_Ecad_cell2_db4b6.npz	[7.6284 6.3338]	[0.01, 0.269]
683	211029_25uM_Ecad_cell2_db4b6.npz	[9.0417 6.717 ]	[0.011, 1.005]
684	211029_25uM_Ecad_cell2_db4b6.npz	[8.5364 6.721 ]	[0.088, 0.347]
685	211029_25uM_Ecad_cell2_db4b6.npz	[-8.6328 -8.4847 -8.3625]	[0.673, 0.931, 1.448]
686	211029_25uM_Ecad_cell2_db4b6.npz	[-9.3423 -7.0002]	[0.016, 1.082]
687	211029_25uM_Ecad_cell2_db4b6.npz	[-8.9908 -8.6309]	[0.085, 0.054]
688	211029_25uM_Ecad_cell2_db4b6.npz	[-8.9615 -6.173 -5.9936 -5.5135]	[0.03, 0.685, 3.66, 5.072]
689	211029_25uM_Ecad_cell2_db4b6.npz	[7.6942 5.9127]	[0.092, 0.185]
690	211029_25uM_Ecad_cell2_db4b6.npz	[-10.0957 -7.4125]	[0.024, 1.626]
691	211029_25uM_Ecad_cell2_db4b6.npz	[-9.5605 -9.1311]	[0.053, 0.118]
692	211114_25uMterndH1_40nmosc_cell2_db1b2b.npz	[-4.5369 -2.9422]	[0.284, 5.114]
693	211114_25uMterndH1_40nmosc_cell2_db1b2b.npz	[2.6858 1.7503]	[0.148, 0.079]
694	211114_25uMterndH1_40nmosc_cell2_db1b2b.npz	[-4.2423 -3.0864]	[0.629, 0.506]
695	211114_25uMterndH1_40nmosc_cell2_db1b2b.npz	[1.186 0.9783]	[0.768, 1.79]
696	211114_25uMterndH1_40nmosc_cell2_db1b2b.npz	[-2.5333 -1.7612]	[0.05, 2.068]
697	211114_25uMterndH1_40nmosc_cell2_db1b2b.npz	[-2.4644 -3.2522]	[0.254, 3.415]
698	211114_25uMterndH1_40nmosc_cell2_db1b2b.npz	[-4.435 -2.8322 -1.5003]	[0.085, 0.55, 3.953]
699	211114_25uMterndH1_40nmosc_cell2_db1b2b.npz	[1.1913 0.8612]	[6.351, 2.085]
700	211029_25uM_Ecad_cell2_db4b6.npz	[-9.139 -8.5435]	[0.055, 0.191]
701	211029_25uM_Ecad_cell2_db4b6.npz	[-8.9235 -7.0784]	[0.092, 0.111]
702	211029_25uM_Ecad_cell2_db4b6.npz	[-10.0693 -8.1661]	[0.009, 0.114]
703	211029_25uM_Ecad_cell2_db4b6.npz	[-8.4409 -8.0831]	[0.222, 0.321]
704	211029_25uM_Ecad_cell2_db4b6.npz	[9.4476 7.6631]	[0.013, 0.392]
705	211029_25uM_Ecad_cell2_db4b6.npz	[-9.3777 -8.9108]	[0.006, 0.434]
706	211029_25uM_Ecad_cell2_db4b6.npz	[8.8025 6.7112]	[0.035, 0.195]
707	211029_25uM_Ecad_cell2_db4b6.npz	[-10.5665 -8.3413 -7.6577]	[0.071, 0.745, 0.86]
708	211029_25uM_Ecad_cell2_db4b6.npz	[-9.8285 -7.8147 -7.4224]	[0.014, 0.938, 1.885]
709	211029_25uM_Ecad_cell2_db4b6.npz	[-12.4586 -9.6073]	[0.008, 0.068]
710	211029_25uM_Ecad_cell2_db4b6.npz	[8.3766 5.1744]	[0.057, 0.007]
711	211029_25uM_Ecad_cell2_db4b6.npz	[-8.1728 -7.9507]	[0.286, 3.818]
712	211029_25uM_Ecad_cell2_db4b6.npz	[-9.8912 -8.7261 -2.4458]	[0.015, 0.618, 0.065]
713	211029_25uM_Ecad_cell2_db4b6.npz	[-6.992 -6.7705]	[1.827, 1.146]
714	211029_25uM_Ecad_cell2_db4b6.npz	[7.6921 7.2877]	[0.125, 0.164]
715	211029_25uM_Ecad_cell2_db4b6.npz	[-11.8545 -9.4766]	[0.008, 0.197]
716	211029_25uM_Ecad_cell2_db4b6.npz	[7.5405 5.7831]	[0.008, 1.539]
717	211029_25uM_Ecad_cell2_db4b6.npz	[9.7202 8.0576 6.5585]	[0.033, 0.142, 0.011]
718	211029_25uM_Ecad_cell2_db4b6.npz	[-9.7466 -8.7737 -8.2278]	[0.009, 0.175, 0.071]
719	211029_25uM_Ecad_cell2_db4b6.npz	[8.3113 6.1899]	[0.006, 0.9]
720	211029_25uM_Ecad_cell2_db4b6.npz	[-8.5589 -8.3332]	[0.351, 0.357]
721	211029_25uM_Ecad_cell2_db4b6.npz	[8.8368 6.6131]	[0.009, 0.013]
722	211029_25uM_Ecad_cell1_db2b3.npz	[12.2385 8.452 ]	[0.009, 0.317]
723	211029_25uM_Ecad_cell1_db2b3.npz	[13.9609 10.4001]	[0.006, 0.038]
724	211029_25uM_Ecad_cell1_db2b3.npz	[-7.7287 -6.0299 -2.5824]	[0.035, 0.054, 0.044]
725	211029_25uM_Ecad_cell1_db2b3.npz	[12.1796 8.9862]	[0.006, 0.03]
726	211029_25uM_Ecad_cell1_db2b3.npz	[-10.4959 -8.4553]	[0.007, 1.46]
727	211029_25uM_Ecad_cell1_db2b3.npz	[-6.6674 -6.1594 -6.2422]	[0.067, 0.233, 0.496]
728	211029_25uM_Ecad_cell1_db2b3.npz	[13.8919 11.2148]	[0.049, 0.05]
729	211029_25uM_Ecad_cell1_db2b3.npz	[12.1245 8.4912]	[0.008, 0.281]
730	211029_25uM_Ecad_cell1_db2b3.npz	[11.241 9.9454]	[0.006, 0.102]
731	211031_25uM_ternary_cell1_db3b7.npz	[10.4252 9.6931 8.2496 4.0339 4.9745]	[0.367, 0.013, 1.187, 4.856, 6.889]
732	211031_25uM_ternary_cell1_db3b7.npz	[-7.5277 -5.6655]	[0.609, 0.839]
733	211031_25uM_ternary_cell1_db3b7.npz	[12.2077 11.5052]	[0.039, 0.011]
734	211031_25uM_ternary_cell1_db3b7.npz	[-9.2811 -6.9563]	[0.024, 1.458]
735	211031_25uM_ternary_cell1_db3b7.npz	[-8.1106 -6.0643 -5.7318]	[0.048, 0.178, 0.301]
736	211031_25uM_ternary_cell1_db3b7.npz	[10.652 8.7278 6.7195]	[0.365, 2.931, 0.326]
737	211031_25uM_ternary_cell1_db3b7.npz	[8.4109 8.2629 7.7847]	[0.07, 0.301, 0.129]
738	211031_25uM_ternary_cell1_db3b7.npz	[-7.391 -5.7218 -5.3602]	[0.07, 1.951, 1.59]
739	211031_25uM_ternary_cell1_db3b7.npz	[9.5555 7.5017]	[0.88, 16.16]
740	211031_25uM_ternary_cell1_db3b7.npz	[9.1048 8.7565 7.2241]	[0.435, 0.133, 16.518]
741	211031_25uM_ternary_cell1_db3b7.npz	[-9.1388 -6.4414]	[0.023, 0.393]
742	211031_25uM_ternarydH1_cell3_db1b4.npz	[-6.212 -8.963 -6.4942 -5.4233]	[0.021, 0.07, 0.318, 0.272]
743	211031_25uM_ternarydH1_cell3_db1b4.npz	[-9.6481 -8.3805 -8.0673]	[0.495, 0.222, 1.709]
744	211031_25uM_ternarydH1_cell3_db1b4.npz	[-10.5273 -8.9997]	[0.012, 1.245]
745	211031_25uM_ternarydH1_cell3_db1b4.npz	[-10.9964 -8.0822]	[0.009, 1.8]
746	211031_25uM_ternarydH1_cell3_db1b4.npz	[-10.7134 -7.2079 -6.2492]	[0.016, 2.151, 0.453]
747	211029_25uM_Ecyto_cell6_db3b4.npz	[-8.6057 -7.1792 -4.7686 -6.3338 -5.1077 -6.4202 -4.8838 -2.3765]	[0.868, 0.141, 6.475, 0.042, 0.057, 0.572, 1.135, 0.304]
748	211029_25uM_Ecyto_cell6_db3b4.npz	[-1.9895 -0.8559 -0.3187 0.6715]	[0.668, 0.25, 1.685, 8.339]
749	211029_25uM_Ecyto_cell6_db3b4.npz	[19.5313 17.7169 14.4737 12.4207 11.6473 10.9927 9.9695 6.6346 4.3045 1.5787]	[0.035, 0.801, 1.969, 0.222, 0.042, 1.368, 4.463, 0.98, 2.523, 25.154]
750	211114_25uMterndH1_35nmosc_db1b1.npz	[-1.2225 -0.9702]	[0.238, 0.424]
751	211114_25uMterndH1_35nmosc_db1b1.npz	[4.1211 4.1682 5.0162 3.7676 2.4348 2.1564 1.8424 1.2317]	[2.671, 0.558, 0.523, 1.856, 0.713, 5.856, 7.431, 4.157]
752	211114_25uMterndH1_35nmosc_db1b1.npz	[3.0684 2.0994]	[0.046, 1.37]
753	211029_25uM_Ecyto_cell6_db3b5.npz	[-9.1156 -8.2019]	[0.076, 0.59]
754	211029_25uM_Ecyto_cell6_db3b5.npz	[8.2841 7.7929]	[1.665, 0.467]
755	211029_25uM_Ecyto_cell6_db3b5.npz	[-10.7029 -7.8374]	[0.01, 0.538]
756	211029_25uM_Ecyto_cell6_db3b5.npz	[12.0903 10.3677]	[0.028, 0.18]
757	211029_25uM_Ecyto_cell6_db3b5.npz	[10.1948 9.271 8.8679]	[0.032, 0.107, 2.978]
758	211029_25uM_Ecyto_cell6_db3b5.npz	[-7.0779 -5.2647]	[0.033, 1.271]
759	211113_25uM_ternarydH1_cell4_db4b4.npz	[-3.7904 -3.6589]	[0.015, 0.075]
760	211113_25uM_ternarydH1_cell4_db4b4.npz	[3.3565 3.1255]	[0.574, 0.067]
761	211113_25uM_ternarydH1_cell4_db4b4.npz	[-2.6861 -2.2109]	[1.016, 0.677]
762	211113_25uM_ternarydH1_cell4_db4b4.npz	[2.5627 2.2869]	[1.532, 0.176]
763	211113_25uM_ternarydH1_cell4_db4b4.npz	[4.1758 3.9937]	[0.387, 0.22]
764	211113_25uM_ternarydH1_cell4_db4b4.npz	[3.2139 2.2694]	[3.826, 0.355]
765	211113_25uM_ternarydH1_cell4_db4b4.npz	[2.6347 2.9906]	[0.019, 0.434]
766	211113_25uM_ternarydH1_cell4_db4b4.npz	[-2.9564 -2.4774 -2.1231]	[0.332, 0.309, 0.788]
767	211031_25uM_ternarydH1_cell5_db1b4.npz	[6.8971 3.7705 2.0092 1.2042]	[0.428, 1.173, 0.268, 0.538]
768	211031_25uM_ternarydH1_cell5_db3b6.npz	[-6.9024 -5.3689]	[0.347, 0.675]
769	211031_25uM_ternarydH1_cell5_db3b6.npz	[-6.1379 -5.8498]	[0.08, 0.527]
770	211031_25uM_ternarydH1_cell5_db3b6.npz	[-6.2413 -4.5534]	[0.053, 0.68]
771	211031_25uM_ternarydH1_cell5_db3b6.npz	[7.9611 7.3175 6.3578]	[1.712, 0.029, 0.406]
772	211031_25uM_ternarydH1_cell5_db3b6.npz	[9.0336 7.169 ]	[0.033, 0.211]
773	211031_25uM_ternarydH1_cell5_db3b6.npz	[10.9693 10.6383]	[0.09, 0.613]
774	211031_25uM_ternarydH1_cell5_db3b6.npz	[-5.2684 -3.9753]	[0.512, 0.764]
775	211031_25uM_ternarydH1_cell5_db3b6.npz	[-6.5001 -4.27 ]	[0.071, 0.826]
776	211031_25uM_ternarydH1_cell5_db3b6.npz	[9.5913 7.4997 6.7788]	[0.023, 0.035, 0.358]
777	211031_25uM_ternarydH1_cell5_db3b6.npz	[11.2559 9.131 8.2927]	[0.01, 11.305, 0.297]
778	211031_25uM_ternarydH1_cell5_db3b6.npz	[-6.7622 -5.2411]	[0.039, 2.258]
779	211031_25uM_ternarydH1_cell5_db3b6.npz	[10.1769 7.576 7.4593]	[0.025, 0.125, 1.318]
780	211031_25uM_ternarydH1_cell5_db3b6.npz	[8.4652 6.1992 5.9409]	[0.121, 0.883, 0.457]
781	211031_25uM_ternarydH1_cell5_db3b6.npz	[11.6609 10.9197 9.1445 8.6118]	[0.116, 0.11, 0.274, 0.074]
782	211113_25uM_ternarydH1_cell4_db2b2.npz	[-6.2631 -5.9891]	[0.084, 0.349]
783	211113_25uM_ternarydH1_cell4_db2b2.npz	[-6.5521 -4.3029]	[0.134, 2.669]
784	211113_25uM_ternarydH1_cell4_db2b2.npz	[6.9934 4.7476]	[0.283, 0.918]
785	211113_25uM_ternarydH1_cell4_db2b2.npz	[-6.554 -5.0734]	[0.091, 0.232]
786	211113_25uM_ternarydH1_cell4_db2b2.npz	[7.1422 4.7109]	[0.194, 0.555]
787	211113_25uM_ternarydH1_cell4_db2b2.npz	[-6.4546 -4.4772]	[0.32, 0.021]
788	211113_25uM_ternarydH1_cell4_db2b2.npz	[-6.6204 -5.1002]	[0.281, 0.288]
789	211113_25uM_ternarydH1_cell4_db2b2.npz	[-5.8122 -4.1781]	[0.201, 1.234]
790	211113_25uM_ternarydH1_cell4_db2b2.npz	[5.8455 3.8005]	[0.071, 0.375]
791	211113_25uM_ternarydH1_cell4_db2b2.npz	[-6.3038 -4.55 ]	[0.663, 6.729]
792	211113_25uM_ternarydH1_cell4_db2b2.npz	[-7.4915 -5.4705]	[0.066, 0.226]
793	211113_25uM_ternarydH1_cell4_db2b2.npz	[-6.2636 -4.5163]	[0.054, 0.789]
794	211113_25uM_ternarydH1_cell4_db2b2.npz	[6.3587 5.0227]	[0.035, 1.891]
795	211113_25uM_ternarydH1_cell4_db2b2.npz	[6.8511 4.5184]	[0.059, 1.596]
796	211113_25uM_ternarydH1_cell4_db2b2.npz	[6.3587 4.0625]	[0.278, 0.564]
797	211113_25uM_ternarydH1_cell4_db2b2.npz	[5.6895 4.8937]	[0.025, 0.522]
798	211113_25uM_ternarydH1_cell4_db2b2.npz	[6.5214 4.3973]	[0.17, 0.542]
799	211113_25uM_ternarydH1_cell4_db2b2.npz	[-6.5458 -4.4684]	[0.289, 5.241]
800	211113_25uM_ternarydH1_cell4_db2b2.npz	[5.4406 3.5056]	[0.573, 0.337]
801	211113_25uM_ternarydH1_cell4_db2b2.npz	[-5.6732 -4.5599]	[0.163, 0.144]
802	211113_25uM_ternarydH1_cell4_db2b2.npz	[6.9464 4.8051 3.9841]	[0.168, 0.404, 2.669]
803	211113_25uM_ternarydH1_cell4_db2b2.npz	[6.2594 4.545 ]	[0.353, 0.28]
804	211113_25uM_ternarydH1_cell4_db2b2.npz	[-5.8208 -4.4535]	[0.16, 0.14]
805	211113_25uM_ternarydH1_cell4_db2b2.npz	[6.3173 4.6753]	[1.331, 0.601]
806	211113_25uM_ternarydH1_cell4_db2b2.npz	[-5.3308 -4.0334]	[0.97, 1.318]
807	211113_25uM_ternarydH1_cell4_db2b2.npz	[4.2334 3.8639 5.0899]	[0.03, 0.053, 0.336]
808	211113_25uM_ternarydH1_cell4_db2b2.npz	[-5.0248 -3.9237 -4.8527]	[0.522, 0.451, 2.118]
809	211113_25uM_ternarydH1_cell4_db2b2.npz	[6.473 4.5707]	[0.127, 0.284]
810	211113_25uM_ternarydH1_cell4_db2b2.npz	[5.3954 5.0405 3.619 5.1274]	[1.081, 2.784, 0.357, 1.651]
811	211113_25uM_ternarydH1_cell4_db2b2.npz	[6.2897 5.6104 4.3011 5.9616 4.4749 6.1221 4.641 6.4032 4.5912]	[0.098, 0.501, 0.02, 0.67, 4.396, 0.608, 0.774, 0.886, 3.479]
812	211113_25uM_ternarydH1_cell4_db2b2.npz	[7.1097 4.5401]	[0.194, 0.641]
813	211113_25uM_ternarydH1_cell4_db2b2.npz	[4.559 4.4042]	[0.013, 0.411]
814	211113_25uM_ternarydH1_cell4_db2b2.npz	[-4.8193 -3.912 -4.7616 -4.4922]	[1.267, 0.059, 2.336, 2.624]
815	211113_25uM_ternarydH1_cell4_db2b2.npz	[7.1293 5.0775]	[0.14, 0.638]
816	211114_25uMterndH1_35nmosc_db1b2.npz	[-2.7768 -2.4638]	[0.018, 0.573]
817	211114_25uMterndH1_35nmosc_db1b2.npz	[-4.2987 -3.5502]	[0.041, 0.072]
818	211114_25uMterndH1_35nmosc_db1b2.npz	[2.5835 1.9688]	[1.403, 0.63]
819	211114_25uMterndH1_35nmosc_db1b2.npz	[-2.5604 -2.2948]	[0.665, 1.651]
820	211114_25uMterndH1_35nmosc_db1b2.npz	[-2.3245 -2.0309]	[0.019, 0.402]
821	211114_25uMterndH1_35nmosc_db1b2.npz	[2.2472 1.6708]	[0.175, 0.191]
822	211114_25uMterndH1_35nmosc_db1b2.npz	[-3.8081 -2.5595]	[0.078, 3.964]
823	211114_25uMterndH1_35nmosc_db1b2.npz	[-2.862 -2.4033]	[0.358, 0.775]
824	211114_25uMterndH1_35nmosc_db1b2.npz	[3.6198 3.0205 2.4703]	[0.02, 0.246, 2.103]
825	211114_25uMterndH1_35nmosc_db1b2.npz	[4.1391 2.9632]	[0.092, 0.118]
826	211114_25uMterndH1_35nmosc_db1b2.npz	[-3.4856 -3.0003]	[0.028, 0.982]
827	211114_25uMterndH1_35nmosc_db1b2.npz	[-2.4566 -2.2854]	[0.02, 0.086]
828	211114_25uMterndH1_35nmosc_db1b2.npz	[-2.7716 -2.2127]	[0.031, 1.402]
829	211114_25uMterndH1_35nmosc_db1b2.npz	[1.8402 1.5441]	[0.127, 0.344]
830	211114_25uMterndH1_35nmosc_db1b2.npz	[2.2091 1.8901]	[0.096, 0.318]
831	211114_25uMterndH1_35nmosc_db1b2.npz	[2.2845 2.009 ]	[0.34, 1.546]
832	211114_25uMterndH1_35nmosc_db1b2.npz	[-3.2084 -2.6514]	[0.021, 0.805]
833	211114_25uMterndH1_35nmosc_db1b2.npz	[2.6147 2.1143]	[1.976, 1.931]
834	211114_25uMterndH1_35nmosc_db1b2.npz	[2.18 1.9986]	[0.155, 0.905]
835	211114_25uMterndH1_35nmosc_db1b2.npz	[-2.8664 -2.5599]	[0.874, 1.077]
836	211114_25uMterndH1_35nmosc_db1b2.npz	[2.4562 2.0104]	[0.443, 0.218]
837	211031_25uM_ternary_cell1_db2b4.npz	[7.4183 4.7488]	[0.074, 0.025]
838	211031_25uM_ternary_cell1_db2b4.npz	[-7.6117 -5.7271]	[0.659, 0.991]
839	211031_25uM_ternary_cell1_db2b4.npz	[-8.8644 -6.7056]	[0.144, 0.521]
840	211031_25uM_ternary_cell1_db2b4.npz	[-9.653 -6.5953]	[0.022, 1.229]
841	211031_25uM_ternary_cell1_db2b4.npz	[-7.4888 -7.2595]	[1.227, 2.682]
842	211031_25uM_ternary_cell1_db2b4.npz	[-7.8246 -7.7229 -7.4075]	[0.141, 0.616, 1.321]
843	211031_25uM_ternary_cell1_db2b4.npz	[-10.2013 -8.7586]	[0.018, 0.607]
844	211031_25uM_ternary_cell1_db2b4.npz	[-7.9845 -7.7709]	[0.384, 0.385]
845	211031_25uM_ternary_cell1_db2b4.npz	[5.1267 4.0826]	[0.019, 0.705]
846	211031_25uM_ternary_cell1_db2b4.npz	[-9.3052 -7.2147]	[0.009, 0.075]
847	211031_25uM_ternary_cell1_db2b4.npz	[5.7708 4.5666]	[0.069, 0.448]
848	211031_25uM_ternary_cell1_db2b4.npz	[-10.6564 -8.3169 -8.341 ]	[0.009, 0.328, 0.446]
849	211031_25uM_ternary_cell1_db2b4.npz	[-9.6658 -6.95 ]	[0.036, 3.332]
850	211031_25uM_ternary_cell1_db2b4.npz	[-8.7603 -6.542 ]	[0.291, 0.926]
851	211031_25uM_ternary_cell1_db2b4.npz	[5.348 3.926]	[0.009, 1.696]
852	211031_25uM_ternarydH1_cell3_db1b2.npz	[-11.6521 -10.7119 -8.6762]	[0.031, 0.044, 0.742]
853	211031_25uM_ternarydH1_cell3_db1b2.npz	[-6.6552 -4.1363 -5.3745]	[0.037, 1.907, 0.25]
854	211031_25uM_ternarydH1_cell3_db1b2.npz	[-7.5749 -6.2459 -4.5017 -5.6734 -4.692 -5.7739 -4.7951 -5.6665 -4.111 ]	[0.013, 0.221, 0.967, 0.533, 0.173, 1.526, 0.164, 0.745, 0.191]
855	211031_25uM_ternarydH1_cell3_db1b2.npz	[8.2178 5.8521]	[0.024, 1.291]
