# Supplementary material for: Mechanism of the cadherin–catenin F-actin catch bond interaction
Source: eLife. 2022 Aug 1;11:e80130. doi: 10.7554/eLife.80130 (PMC9402232; doi:10.7554/eLife.80130)
Supplement: Figure 6—figure supplement 1—source data 3. [file elife-80130-fig6-figsupp1-data3.xlsx]

## Sheet: terndH1_data
forces	lifetime
4.4152	0.181
5.2996	0.526
8.8622	0.265
4.2905	3.112
3.7313	3.361
7.6281	0.548
7.552	0.436
4.3514	1.24
4.2677	2.177
2.5523	1.088
2.4014	0.625
7.5626	0.026
6.3339	2.119
1.2871	2.829
2.6294	0.471
2.1563	0.684
3.1028	0.165
3.499	0.593
0.9362	3.859
3.132	0.802
3.1434	1.684
3.3865	0.769
2.4471	0.389
3.5635	1.095
3.6825	1.289
1.87	2.138
2.06	0.494
2.5581	0.76
3.573	3.335
6.0773	0.495
2.5565	2.272
7.2217	4.006
4.125	0.341
3.114	0.102
4.4004	0.839
3.3062	0.135
3.5748	0.053
3.9555	0.409
3.9509	1.794
1.3398	4.388
5.0397	0.275
7.915	0.222
6.5364	2.213
7.2104	0.084
6.8738	0.519
8.1169	0.135
8.7249	0.595
6.8154	0.091
9.2799	0.288
5.7879	0.043
6.1842	0.179
5.4483	4.735
4.2275	0.609
6.508	0.357
6.1671	0.081
6.2549	0.304
7.7687	0.679
6.0243	0.031
8.3117	0.263
7.6196	0.705
5.5758	2.702
5.3329	0.972
7.6506	1.167
8.2229	0.091
5.0426	0.01
7.3096	0.03
8.4287	0.423
5.5904	1.44
7.7308	0.135
1.7062	0.944
1.926	0.069
3.2523	0.259
4.2202	0.038
1.5447	0.076
1.8859	0.265
1.3818	2.27
1.7349	0.409
1.5696	0.215
3.2819	1.037
9.9795	0.04
10.3592	3.354
7.7212	2.115
8.3948	0.304
8.4029	0.57
8.1505	0.802
4.3729	5.377
9.022	0.979
8.1762	0.251
2.5004	7.988
8.1804	7.205
9.4711	3.311
8.3536	0.396
8.6043	1.541
7.0425	0.149
7.2972	1.419
9.1109	0.111
10.5583	12.675
10.8797	1.307
10.7705	0.044
8.3572	0.238
10.2949	0.26
7.1965	3.677
9.9285	0.51
10.8789	0.341
3.1265	0.078
1.4189	1.854
1.4241	1.46
2.5567	1.116
2.0317	1.897
2.3931	0.697
1.9225	0.113
2.4333	0.626
2.9466	0.139
3.1437	0.858
1.5423	0.322
1.9257	0.465
7.9288	0.178
10.1637	0.05
0.9616	0.724
3.0393	0.073
3.4542	0.675
2.3816	0.524
5.3014	0.187
1.5643	0.533
3.3523	2.133
8.2632	0.189
7.2589	0.637
4.5498	0.465
1.6531	6.677
7.6367	0.795
4.4731	0.265
8.5333	1.582
5.1445	3.191
8.9343	0.899
9.1319	0.381
5.7387	0.039
4.2637	2.245
5.709	0.466
5.8083	2.077
8.0135	0.585
8.6786	1.398
4.7218	1.014
8.1284	1.755
5.2997	1.429
5.6979	0.151
5.3782	0.318
8.6765	1.014
6.0154	1.487
5.1278	20.38
7.2584	2.119
4.8315	1.635
5.3617	0.142
4.3562	3.346
4.7931	0.588
4.5982	0.039
7.1116	0.452
7.1966	2.944
5.1333	0.051
4.2012	0.383
5.104	0.026
5.4616	0.026
6.0699	0.219
5.4187	0.021
5.6352	3.001
5.8676	0.896
7.6658	0.122
4.5031	0.152
5.4455	1.407
5.5475	0.775
5.3494	0.261
9.0104	3.431
5.0764	0.543
5.2664	0.166
6.111	0.834
5.4816	2.211
7.8111	0.657
4.9283	0.993
5.6034	4.628
5.8317	0.428
6.098	5.744
4.3961	0.118
7.6794	4.086
3.1451	0.159
1.284	0.201
1.7676	5.388
0.5613	0.229
7.3098	0.09
7.9074	0.142
7.1908	2.221
6.4886	0.316
4.9372	1.142
8.2627	0.405
8.3481	1.317
5.5865	0.525
4.0507	0.574
6.0342	1.816
8.832	2.379
3.7023	0.938
2.4005	0.079
11.1551	0.086
2.1684	2.593
2.4753	0.051
2.9096	3.297
2.6615	0.383
1.7985	1.895
6.2448	0.152
4.4646	0.583
3.7219	0.12
4.1546	2.503
4.1545	0.074
2.5222	1.146
4.8529	0.16
4.4553	0.753
4.0659	0.071
6.2653	0.616
4.3022	0.136
4.3326	1.783
4.3848	0.205
4.7274	1.111
4.6791	0.921
3.982	0.168
6.9828	3.568
5.1886	0.201
5.8269	0.091
5.2373	0.161
4.3149	0.552
5.1886	0.109
7.0572	0.708
4.1354	0.206
7.0227	1.59
7.0025	0.067
6.9914	0.35
5.9999	3.702
6.0591	0.227
5.1587	0.319
6.0524	0.218
6.7685	1.014
8.5001	0.604
6.4312	0.162
4.8163	0.082
4.8188	0.688
5.8485	0.062
7.1009	0.661
7.5865	1.186
6.4976	0.174
9.5253	0.993
9.5526	0.354
7.5939	0.16
8.2346	0.682
9.8203	0.121
7.6623	0.14
8.9821	0.154
11.205	0.133
9.6105	0.559
7.2673	0.074
9.3577	1.756
7.912	0.184
9.5288	0.184
9.4315	0.27
9.9779	0.254
7.916	0.978
7.3535	0.194
7.2041	1.943
7.7461	4.36
9.1862	2.505
7.4721	0.575
10.3072	0.19
7.2487	0.111
9.7178	4.951
6.7623	1.237
8.9526	0.013
5.1193	0.127
8.8781	3.771
11.598	0.047
9.1328	0.253
8.048	0.093
8.3623	0.288
9.6742	0.32
8.1558	0.653
3.0619	1.334
7.7501	1.509
4.4733	0.7
8.1739	0.704
6.6781	0.233
4.7359	0.894
7.2934	0.598
1.5757	1.778
4.9758	1.388
6.8765	2.435
4.6736	0.345
5.4954	0.008
5.3924	0.006
8.5631	1.07
5.6615	0.221
6.8043	4.833
5.667	0.655
4.8632	0.687
5.4559	0.931
7.7772	0.239
6.1383	0.189
7.1728	0.066
5.8752	0.186
7.8392	0.103
6.8661	0.858
5.8911	2.19
4.8651	1.095
5.438	1.553
6.8038	1.951
4.7029	0.16
4.7518	0.463
5.4397	1.039
4.4055	0.046
6.108	3.747
7.9586	0.198
8.2753	1.618
7.5219	0.383
9.1681	14.094
8.6215	2.235
9.2477	0.159
10.2156	2.067
7.7187	0.237
7.9178	1.149
10.3679	1.051
8.0265	1.814
10.1498	0.399
10.2835	0.02
6.9711	0.191
5.4162	0.225
6.5581	1.031
6.9024	0.199
6.3425	0.04
6.8513	0.27
6.9186	0.038
6.8437	2.811
5.3825	0.702
6.1351	1.221
5.5468	0.11
5.9779	0.584
7.0112	0.107
7.4633	0.207
8.2283	0.045
8.107	0.253
7.9472	0.665
8.2038	0.247
8.2554	0.03
7.4205	0.692
6.3702	0.015
6.0723	0.318
7.7108	0.907
8.2724	0.955
6.7759	3.068
7.6088	2.236
7.1166	1.501
1.5441	2.099
6.2214	0.033
11.0838	0.022
9.3349	0.225
1.5353	1.383
10.7414	0.379
10.1963	0.188
4.396	0.029
6.6977	0.156
10.5983	0.163
6.4119	0.112
6.5386	0.064
6.8963	0.375
4.8641	0.28
6.5782	0.155
6.7555	0.15
6.4649	0.08
3.9461	2.963
7.7667	1.851
5.6642	2.355
8.9274	1.471
7.5763	0.047
4.172	0.345
6.1658	0.12
7.66	0.063
8.6138	0.016
7.7384	0.084
9.5368	1.462
9.6451	0.032
5.5192	1.408
7.0156	0.078
0.7338	0.079
0.8761	0.642
1.2484	6.992
1.2356	5.131
1.6973	5.258
2.0833	1.956
1.031	0.63
1.1645	1.093
0.5516	3.623
0.9702	9.346
0.9818	0.708
0.8628	2.24
0.7708	5.326
2.1196	0.206
2.3066	0.347
1.7948	1.518
1.0314	1.471
9.4429	0.889
5.1192	0.057
4.6658	0.322
4.3769	1.498
5.438	0.653
2.767	0.964
8.6656	1.086
3.8534	0.079
7.1718	7.718
8.9732	0.482
4.8823	0.108
4.0871	0.416
6.3609	0.246
4.4959	1.496
5.8513	0.089
4.3128	0.553
4.5473	0.428
7.0475	0.163
7.0788	0.706
4.3898	0.093
4.0806	0.202
6.9943	1.597
6.958	0.066
6.0045	3.697
5.0027	1.627
6.075	0.226
5.1901	0.322
4.002	0.045
6.0842	0.218
2.85	0.258
6.7634	1.018
8.4849	0.607
6.534	0.16
4.5	0.086
4.7929	0.69
6.2075	0.057
3.9765	0.269
7.1057	0.664
8.2615	0.954
7.5569	1.163
8.1096	0.138
1.4442	0.226
2.7793	1.189
4.0886	0.203
3.0451	0.586
3.3413	1.787
4.1951	0.182
2.8265	0.393
3.8988	2.29
2.475	1.283
4.0554	0.115
3.6631	0.139
2.7083	4.444
2.2293	0.98
9.6973	0.297
7.1587	0.005
8.754	0.614
9.8879	1.269
6.7534	4.219
7.9981	0.273
6.4978	0.939
7.3855	0.302
6.6955	0.553
8.7371	4.466
11.0211	0.198
11.1531	0.46
3.9395	0.21
2.1783	0.1
5.1267	0.085
4.8146	0.172
4.6149	0.188
5.2236	0.202
2.9485	0.171
4.283	0.125
3.9323	0.093
3.5246	0.3
4.1285	0.18
4.604	0.14
5.2468	0.08
3.3218	0.102
5.2429	0.435
4.7571	0.047
3.3159	0.279
6.2024	0.359
5.209	0.423
3.1945	0.04
4.6395	0.102
5.8619	0.086
7.6703	4.205
8.1674	1.551
9.6264	0.092
9.3154	1.46
8.0253	2.803
7.7043	0.407
6.9992	2.292
8.3052	1.202
1.7373	0.273
6.7381	0.511
6.5087	3.783
9.2426	0.009
6.4468	2.034
8.3606	0.355
10.2827	0.337
5.7255	2.575
6.8089	5.03
7.0686	0.209
6.5147	0.84
6.2255	0.363
6.0944	0.365
7.2112	0.043
7.8725	0.615
5.3385	0.14
6.5231	1.756
5.8025	1.623
7.1008	0.05
6.6846	0.609
9.2764	0.805
9.9388	1.087
3.3806	3.758
7.3805	0.395
8.5718	0.404
6.3815	0.049
8.3223	0.308
5.9403	2.262
7.6847	0.202
5.6464	0.32
4.2037	0.377
5.7156	0.113
5.536	1.288
8.8571	0.942
8.1868	1.487
7.1302	5.291
7.8784	0.236
7.3318	0.376
7.3369	0.034
6.1727	0.055
7.7026	1.27
7.3524	0.19
8.3333	0.869
7.4495	0.081
7.0171	1.677
4.438	4.326
3.1575	0.576
6.0217	4.474
5.9838	2.419
2.332	0.114
2.7847	1.836
2.9021	1.838
2.172	2.549
4.1595	0.819
0.993	3.664
4.8499	0.581
2.3948	0.157
4.1801	1.815
0.8539	0.392
2.8287	0.074
2.8236	0.245
2.3247	4.441
3.0925	0.711
3.7274	1.08
3.2236	1.47
2.619	0.444
2.9275	0.134
3.0468	0.751
4.4594	0.137
5.8052	0.143
7.0672	0.06
6.7256	0.409
8.0462	0.782
7.393	0.662
4.9092	4.03
5.9001	0.496
7.04	2.358
5.3003	1.795
6.2418	0.06
7.0086	0.318
4.5691	0.204
8.2169	0.388
3.5739	0.102
4.5015	0.209
8.0346	1.176
7.4959	1.119
7.7527	0.142
7.4233	0.213
9.6558	0.226
8.4435	0.202
8.2692	0.029
7.5716	0.056
8.0173	0.028
9.1899	0.128
7.6637	0.932
6.3357	3.308
1.9266	5.192
8.0841	0.945
6.44	0.226
5.5578	0.371
6.1002	3.049
9.8225	2.322
8.7426	0.031
7.2005	0.663
6.1226	1.895
7.2498	0.231
7.2961	1.726
10.3592	0.363
10.1144	0.102
7.1294	0.39
5.7864	0.52
1.2389	13.029
8.6168	0.778
6.0673	4.629
6.894	1.573
7.2849	0.42
7.285	0.328
2.2094	4.926
1.6944	15.692
7.583	0.244
8.8286	0.451
8.4335	0.061
7.0045	0.196
4.2013	0.025
6.5435	2.355
6.2947	0.112
6.3329	0.115
1.5626	0.651
1.5431	1.021
1.7396	1.58
1.6275	0.913
2.172	4.136
3.4862	0.055
9.3204	0.344
6.9297	0.085
7.6192	0.311
1.1556	2.296
7.3529	0.121
3.6873	0.16
10.874	0.13
4.8118	0.086
8.578	0.04
3.0485	0.086
7.9398	0.271
7.2018	0.164
10.3409	0.088
5.9811	1.987
5.8216	0.012
6.3602	5.979
7.4907	1.29
9.0023	0.117
7.3752	2.092
8.5002	0.577
3.5504	0.014
2.2001	0.284
4.7469	0.472
5.5325	4.534
6.5069	1.172
5.8471	1.778
7.391	0.449
8.0282	1.992
5.1146	1.187
6.6199	6.476
8.2695	6.938
9.1844	0.023
9.3404	2.037
9.5984	1.118
8.5636	1.771
8.8984	0.173
8.8099	0.011
8.6054	1.014
6.5094	1.117
7.1827	0.151
8.7899	0.069
4.6361	1.751
4.1006	4.451
6.836	2.562
8.045	1.622
4.2547	1.4
8.7788	0.148
8.3832	0.498
7.2776	0.71
8.5494	1.827
7.5798	0.845
7.4246	1.002
6.3338	0.269
6.717	1.005
6.721	0.347
8.3625	1.448
7.0002	1.082
8.6309	0.054
5.5135	5.072
5.9127	0.185
7.4125	1.626
9.1311	0.118
2.9422	5.114
1.7503	0.079
3.0864	0.506
0.9783	1.79
1.7612	2.068
3.2522	3.415
1.5003	3.953
0.8612	2.085
8.5435	0.191
7.0784	0.111
8.1661	0.114
8.0831	0.321
7.6631	0.392
8.9108	0.434
6.7112	0.195
7.6577	0.86
7.4224	1.885
9.6073	0.068
5.1744	0.007
7.9507	3.818
2.4458	0.065
6.7705	1.146
7.2877	0.164
9.4766	0.197
5.7831	1.539
6.5585	0.011
8.2278	0.071
6.1899	0.9
8.3332	0.357
6.6131	0.013
8.452	0.317
10.4001	0.038
2.5824	0.044
8.9862	0.03
8.4553	1.46
6.2422	0.496
11.2148	0.05
8.4912	0.281
9.9454	0.102
4.9745	6.889
5.6655	0.839
11.5052	0.011
6.9563	1.458
5.7318	0.301
6.7195	0.326
7.7847	0.129
5.3602	1.59
7.5017	16.16
7.2241	16.518
6.4414	0.393
5.4233	0.272
8.0673	1.709
8.9997	1.245
8.0822	1.8
6.2492	0.453
2.3765	0.304
0.6715	8.339
1.5787	25.154
0.9702	0.424
1.2317	4.157
2.0994	1.37
8.2019	0.59
7.7929	0.467
7.8374	0.538
10.3677	0.18
8.8679	2.978
5.2647	1.271
3.6589	0.075
3.1255	0.067
2.2109	0.677
2.2869	0.176
3.9937	0.22
2.2694	0.355
2.9906	0.434
2.1231	0.788
1.2042	0.538
5.3689	0.675
5.8498	0.527
4.5534	0.68
6.3578	0.406
7.169	0.211
10.6383	0.613
3.9753	0.764
4.27	0.826
6.7788	0.358
8.2927	0.297
5.2411	2.258
7.4593	1.318
5.9409	0.457
8.6118	0.074
5.9891	0.349
4.3029	2.669
4.7476	0.918
5.0734	0.232
4.7109	0.555
4.4772	0.021
5.1002	0.288
4.1781	1.234
3.8005	0.375
4.55	6.729
5.4705	0.226
4.5163	0.789
5.0227	1.891
4.5184	1.596
4.0625	0.564
4.8937	0.522
4.3973	0.542
4.4684	5.241
3.5056	0.337
4.5599	0.144
3.9841	2.669
4.545	0.28
4.4535	0.14
4.6753	0.601
4.0334	1.318
5.0899	0.336
4.8527	2.118
4.5707	0.284
5.1274	1.651
4.5912	3.479
4.5401	0.641
4.4042	0.411
4.4922	2.624
5.0775	0.638
2.4638	0.573
3.5502	0.072
1.9688	0.63
2.2948	1.651
2.0309	0.402
1.6708	0.191
2.5595	3.964
2.4033	0.775
2.4703	2.103
2.9632	0.118
3.0003	0.982
2.2854	0.086
2.2127	1.402
1.5441	0.344
1.8901	0.318
2.009	1.546
2.6514	0.805
2.1143	1.931
1.9986	0.905
2.5599	1.077
2.0104	0.218
4.7488	0.025
5.7271	0.991
6.7056	0.521
6.5953	1.229
7.2595	2.682
7.4075	1.321
8.7586	0.607
7.7709	0.385
4.0826	0.705
7.2147	0.075
4.5666	0.448
8.341	0.446
6.95	3.332
6.542	0.926
3.926	1.696
8.6762	0.742
5.3745	0.25
4.111	0.191
5.8521	1.291
0.7667	0.92
0.6054	0.619
0.6449	1.603
0.8824	1.245
1.2674	0.148
1.7015	3.465
1.4582	4.094
0.4009	2.11
1.2059	2.543
0.5869	1.998
0.2176	0.908
0.411	0.88
0.5582	1.509
1.2801	0.294
0.6936	1.313
1.5199	1.565
0.0769	4.274
2.0137	11.863
1.0587	5.784
0.4068	7.22
1.8551	10.054
0.0718	4.421
0.1042	6.481
0.6481	0.167
0.1586	2.061
0.5314	0.249
0.6993	0.587
0.5951	2.121
0.4516	1.045
0.7527	0.243
1.3074	3.588
1.3034	3.34
0.7554	16.533
1.9065	0.753
1.1641	0.355
0.547	1.959
0.9793	2.585
1.7489	0.426
1.1425	0.696
0.7777	28.69
0.8487	1.316
0.46	0.623
0.3767	1.661
0.1128	1.576
0.2509	0.49
0.5294	1.505
0.1771	0.911
0.2763	1.05
0.2091	8.088
0.6059	5.296
0.0608	1.198
0.2366	0.592
0.7133	5.696
1.5482	1.969
0.8139	4.197
0.1788	1.108
1.505	0.726
0.6551	0.549
0.5714	0.305
0.7169	0.705
0.3198	7.526
0.0695	3.596
1.2601	0.392
0.3496	1.271
0.2076	1.945
0.1173	6.655
1.6253	1.581
0.7489	4.66
0.7098	0.269
0.689	2.188
0.8061	4.021
1.4527	2.709
0.7327	1.195
0.2241	0.336
0.1085	2.271
0.1711	1.497
0.6264	0.469
1.1778	1.367
0.3152	5.88
0.2305	1.667
1.4077	1.027
1.47	0.48
1.5459	0.822
1.1205	3.464
0.116	0.426
1.9333	1.85
0.748	6.266
0.9812	5.927
2.2309	1.501
1.5072	2.51
0.8726	0.18
0.1083	3.755
2.2975	0.441
2.0905	0.531
1.4242	1.124
1.306	0.323
0.6792	0.167
1.8597	5.403
0.9649	0.19
1.674	0.685
1.8542	1.975
0.9624	2.57
1.2587	0.201
1.3987	0.108
1.6033	0.233
0.554	1.203
2.0448	0.259
1.4903	3.051
1.843	0.082
1.6679	2.702
0.8245	0.566
0.1697	0.239
0.8137	0.207
0.2367	7.819
1.5224	0.394
2.4866	1.216
2.5736	0.694
1.9945	2.558
0.7541	2.986
0.6444	0.173
0.3349	3.125
0.076	3.01
0.7154	1.071
0.9123	0.189
0.6966	3.91
2.1893	0.84
0.1758	1.145
0.3847	1.004
0.0868	2.924
0.5715	0.581
0.193	5.972
0.7338	1.043
1.4397	0.652
1.0602	6.85
0.3769	6.684
0.1759	1.337
1.1676	1.765
0.9002	0.521
0.6924	0.187
0.7719	0.093
0.393	0.228
0.1622	2.942
0.3577	1.778
1.5179	0.04
0.8349	0.186
